# Supplementary material
Source: bioRxiv or medRxiv preprint supplement (https://www.biorxiv.org/highwire/filestream/108602/field_highwire_adjunct_files/3/178806-12.pdf)

## **Supplementary Figure 12**

Each of the subsequent pages shows a GWAS Manhattan plot for the multi-trait GWAS carried out on the 23 groupings of IDPs described in **Supplementary Table 7**.

dMRI Probtrackx

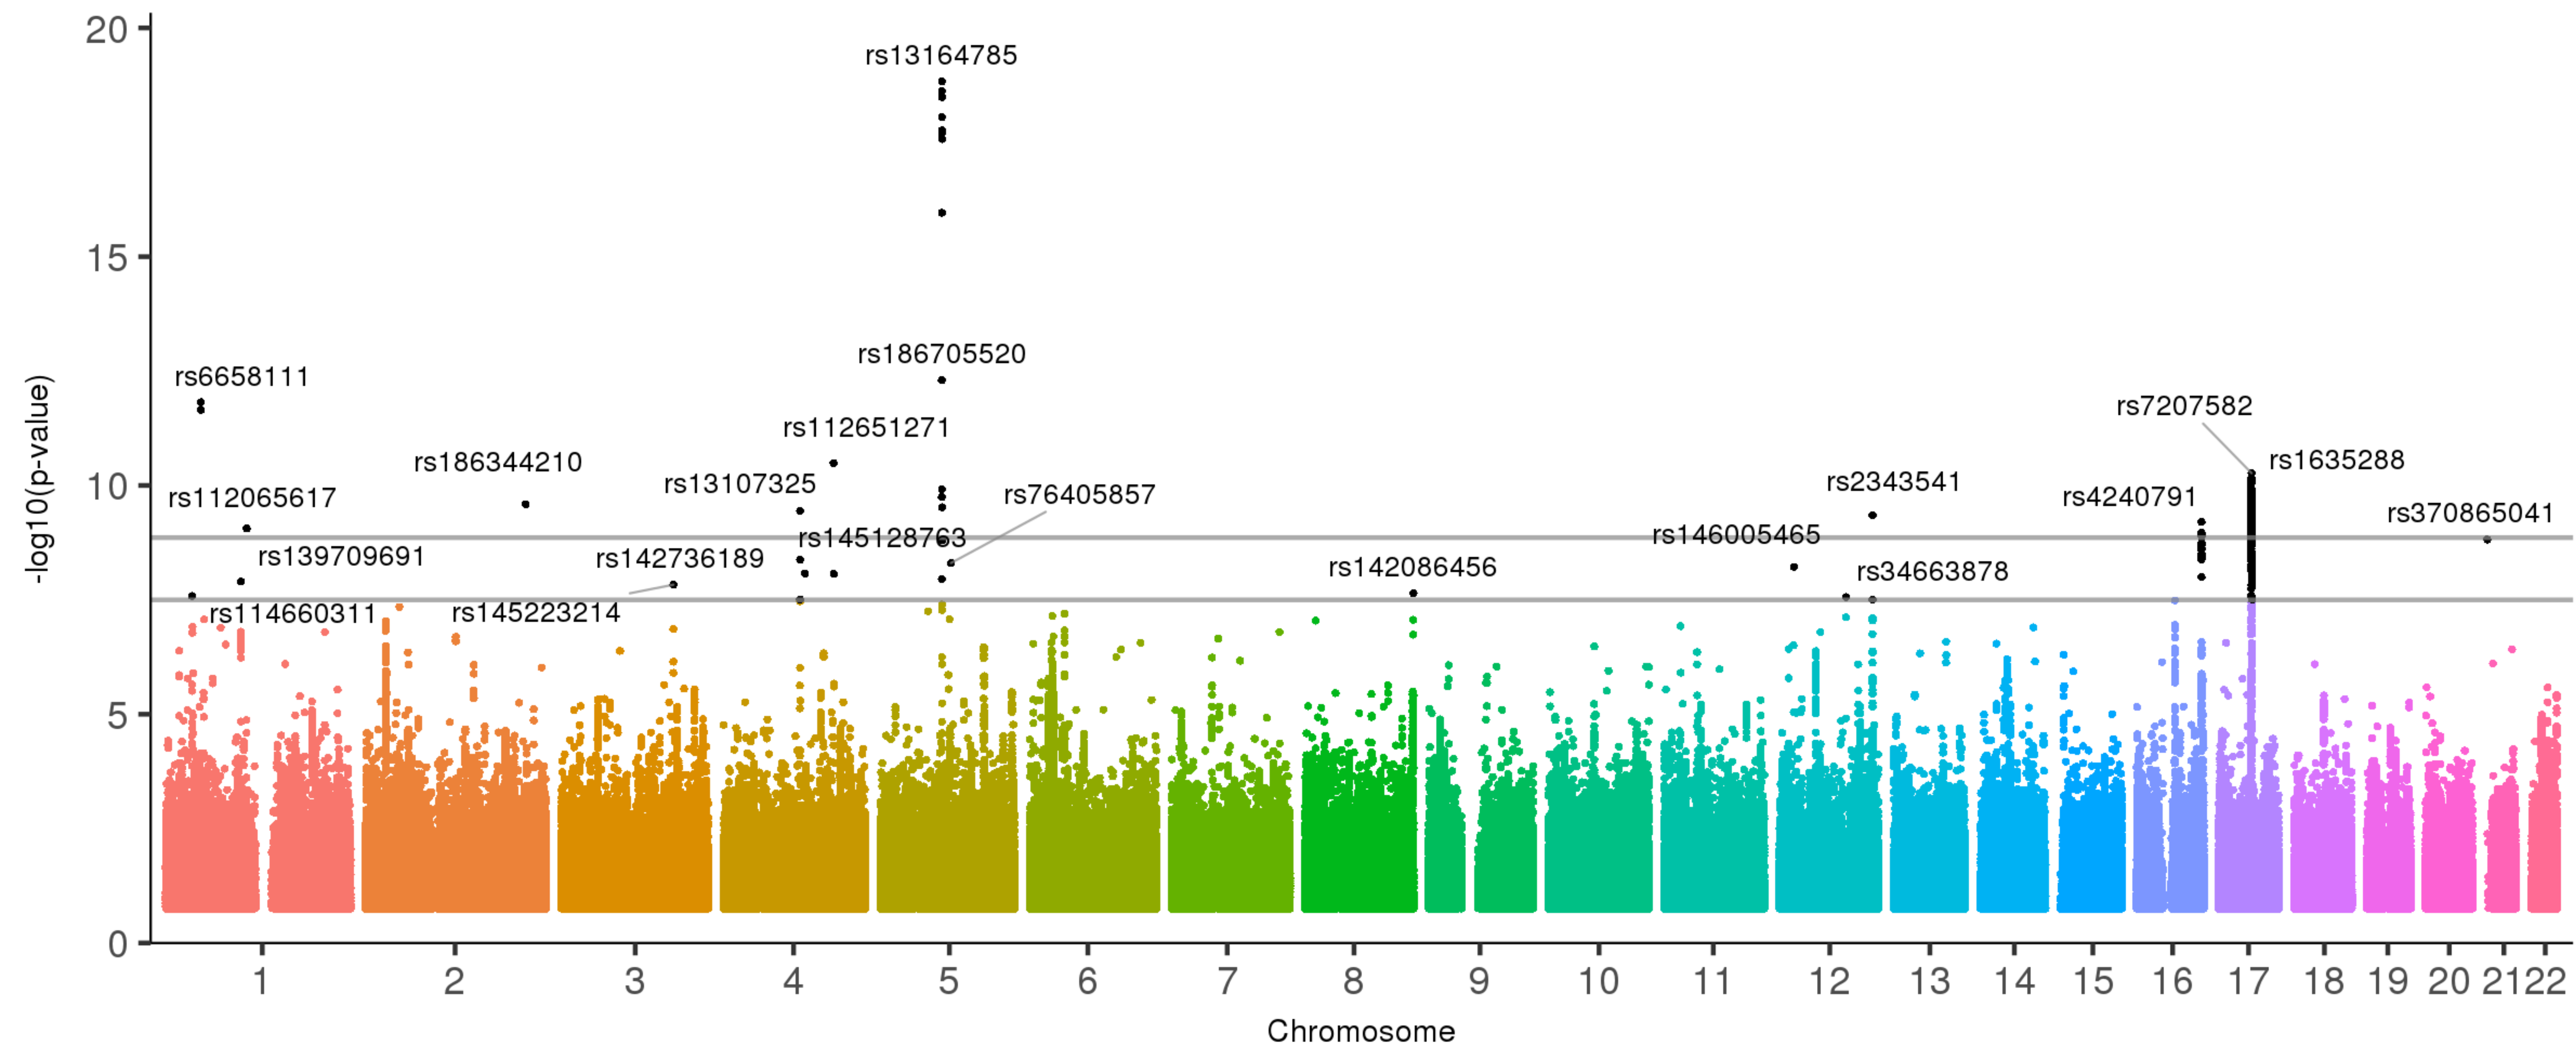

dMRI Probtrackx

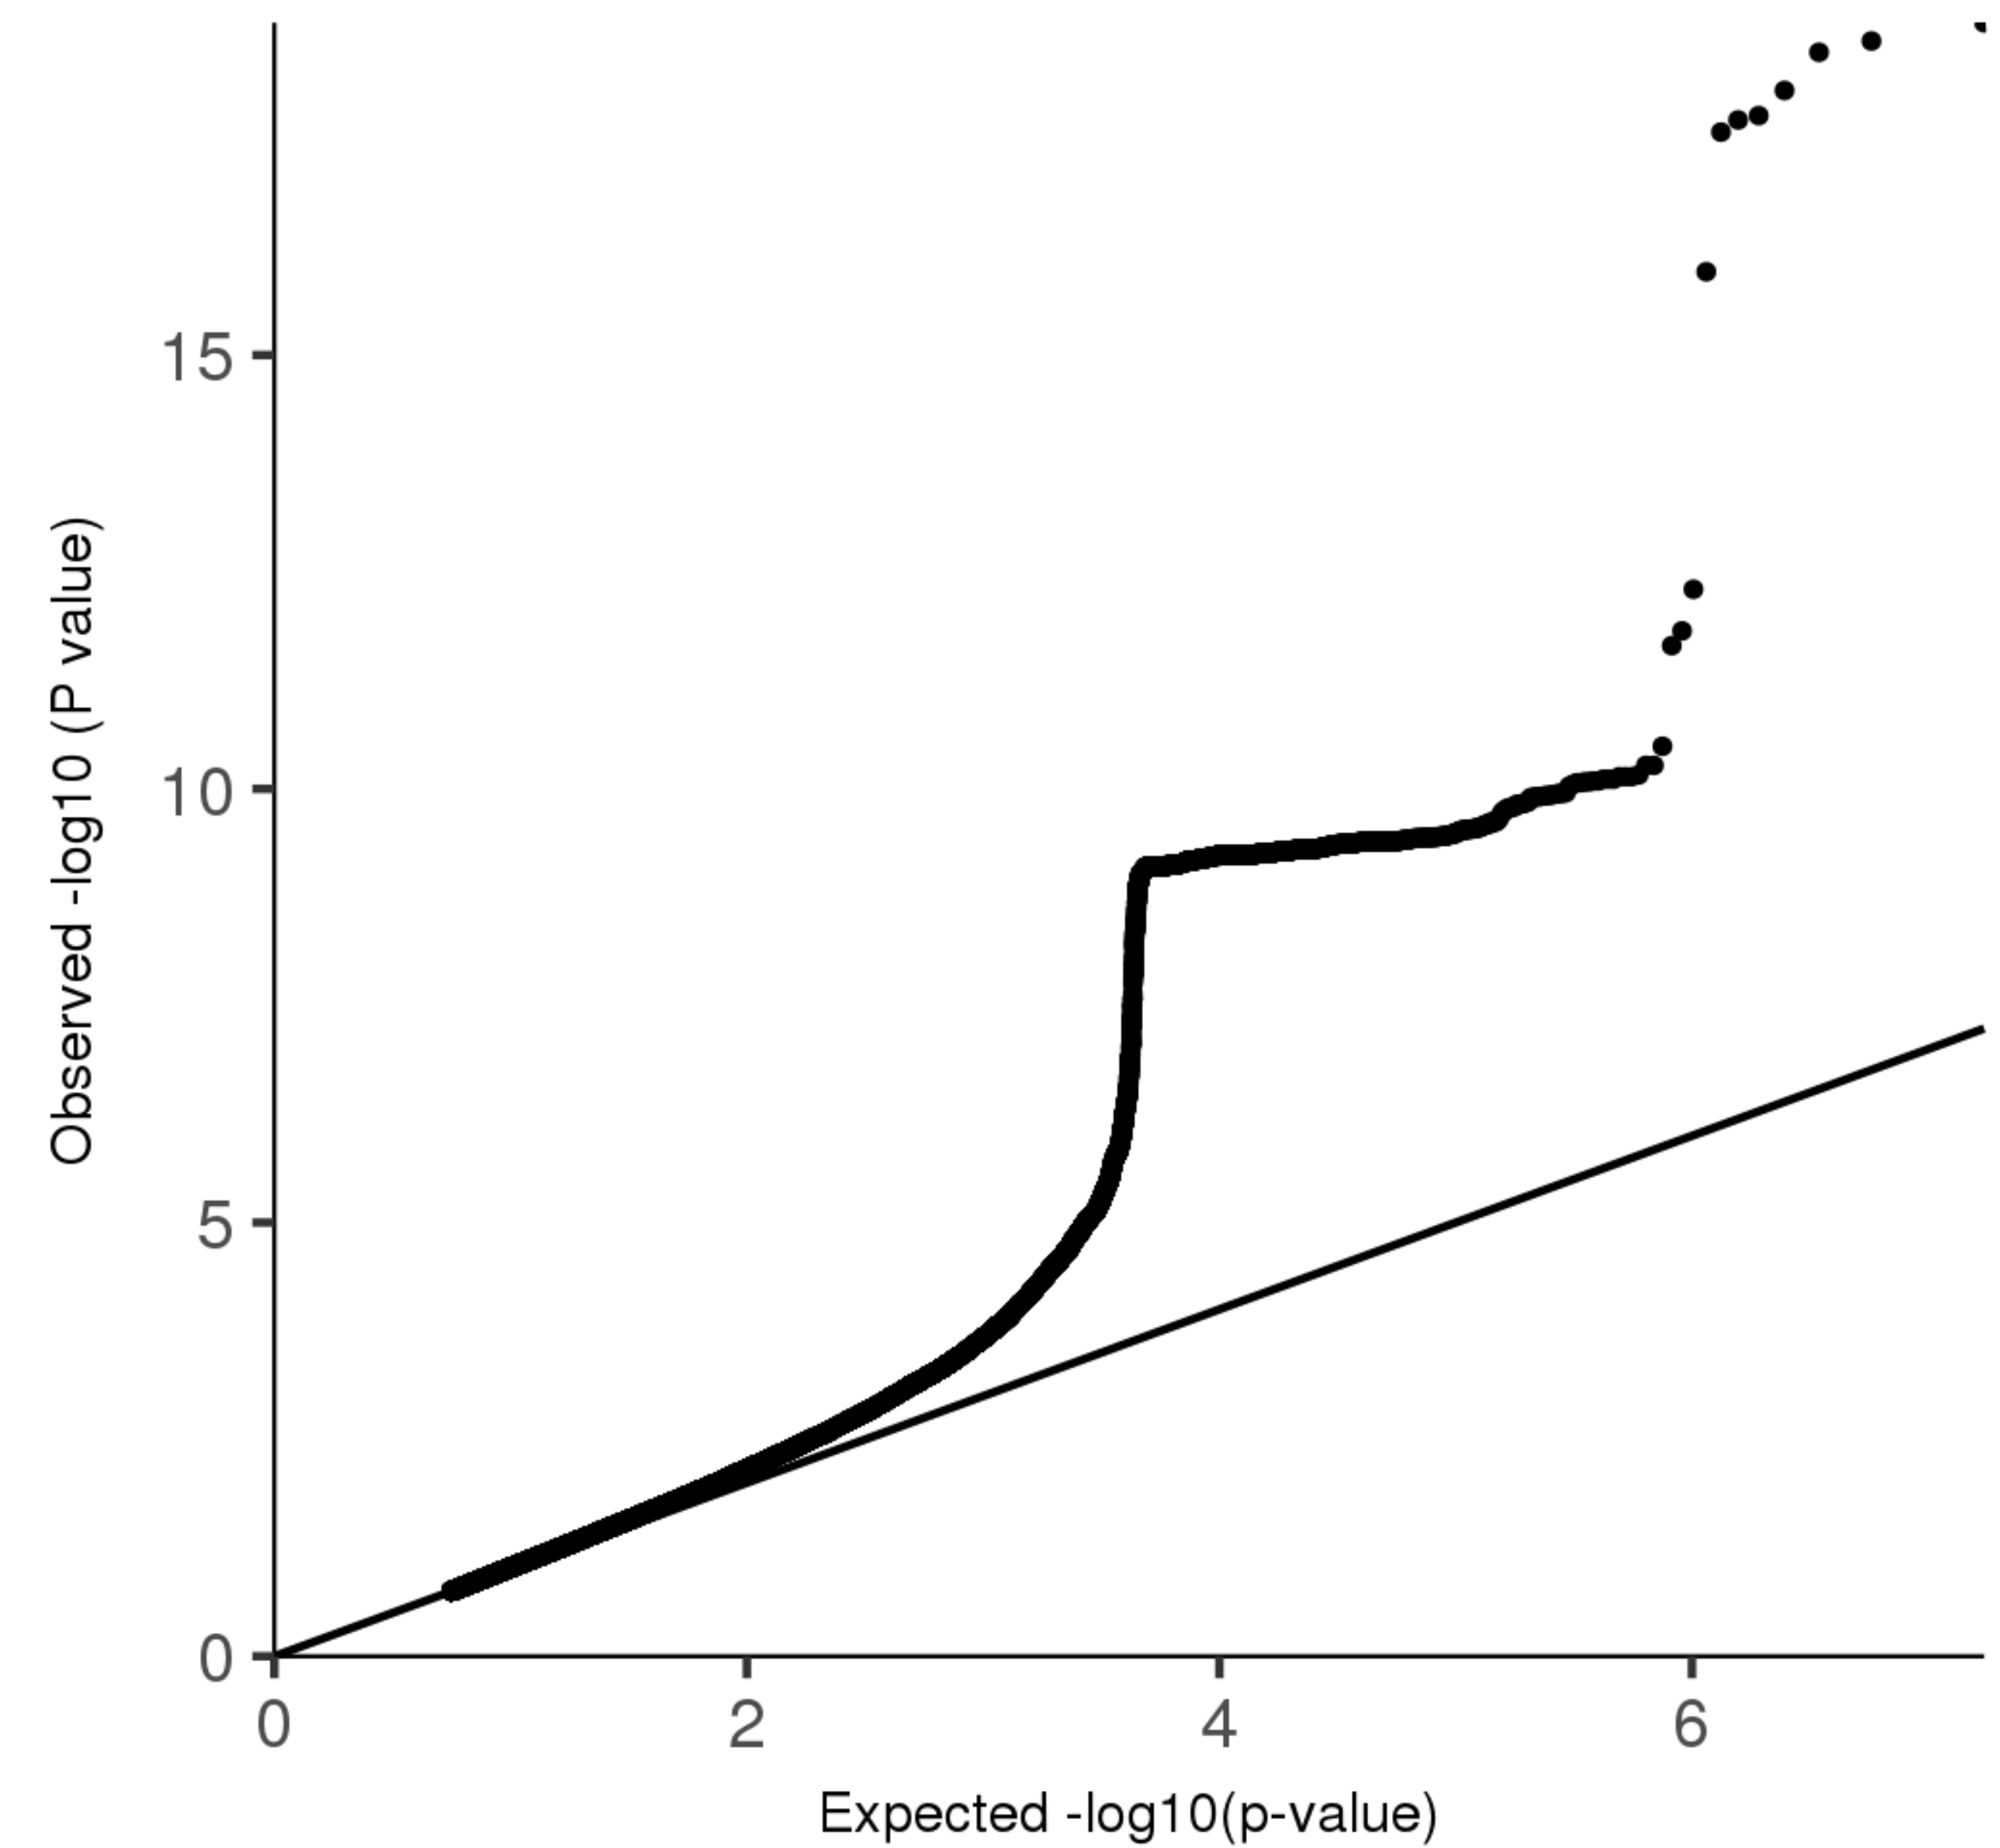

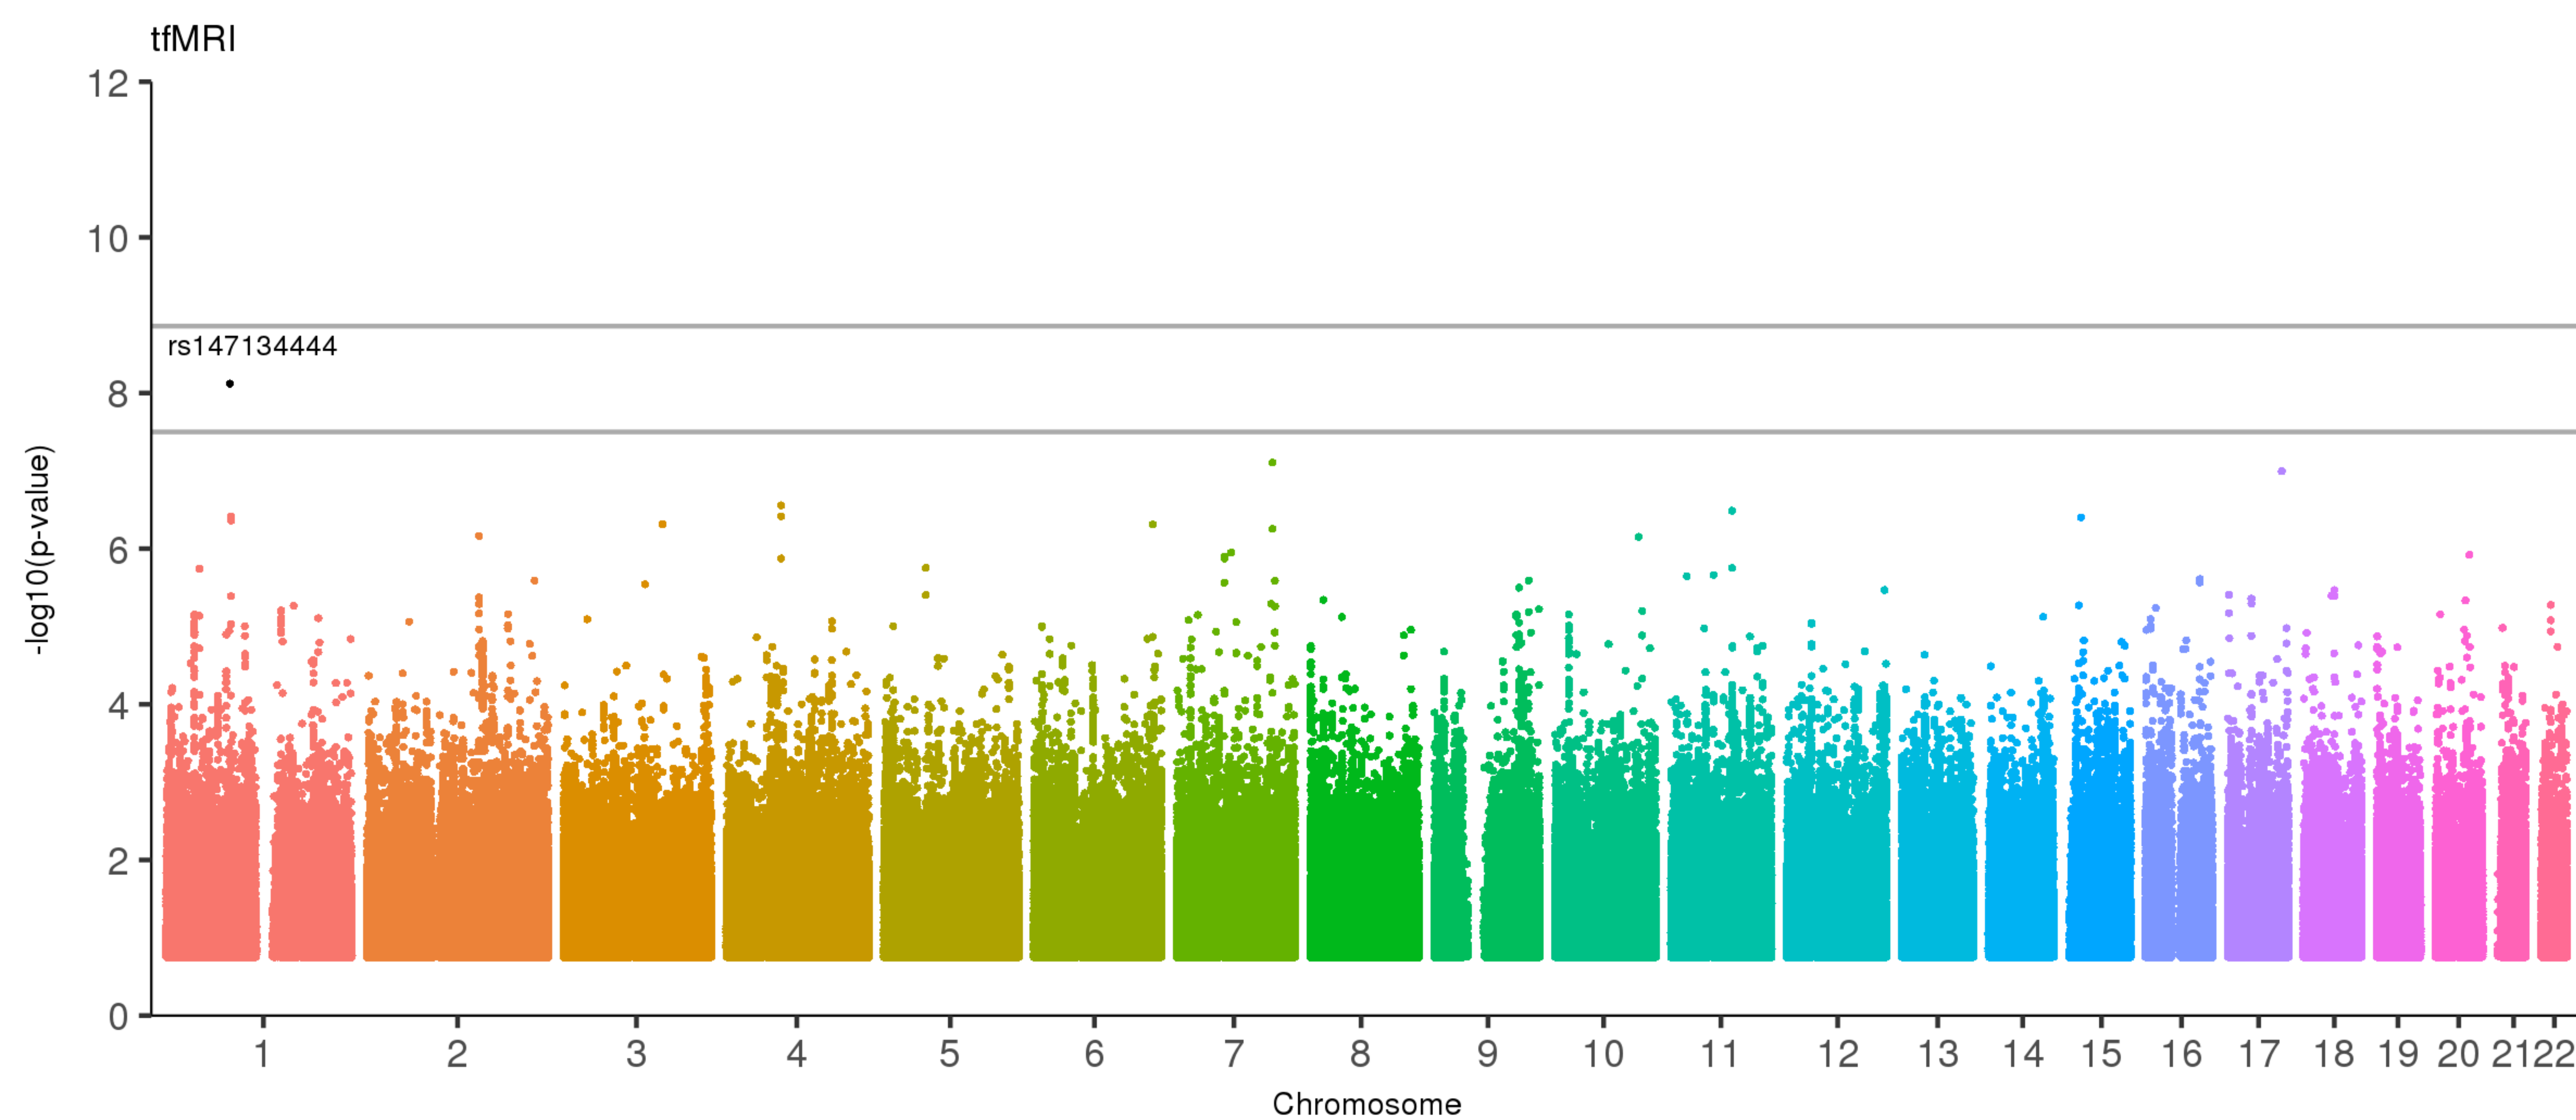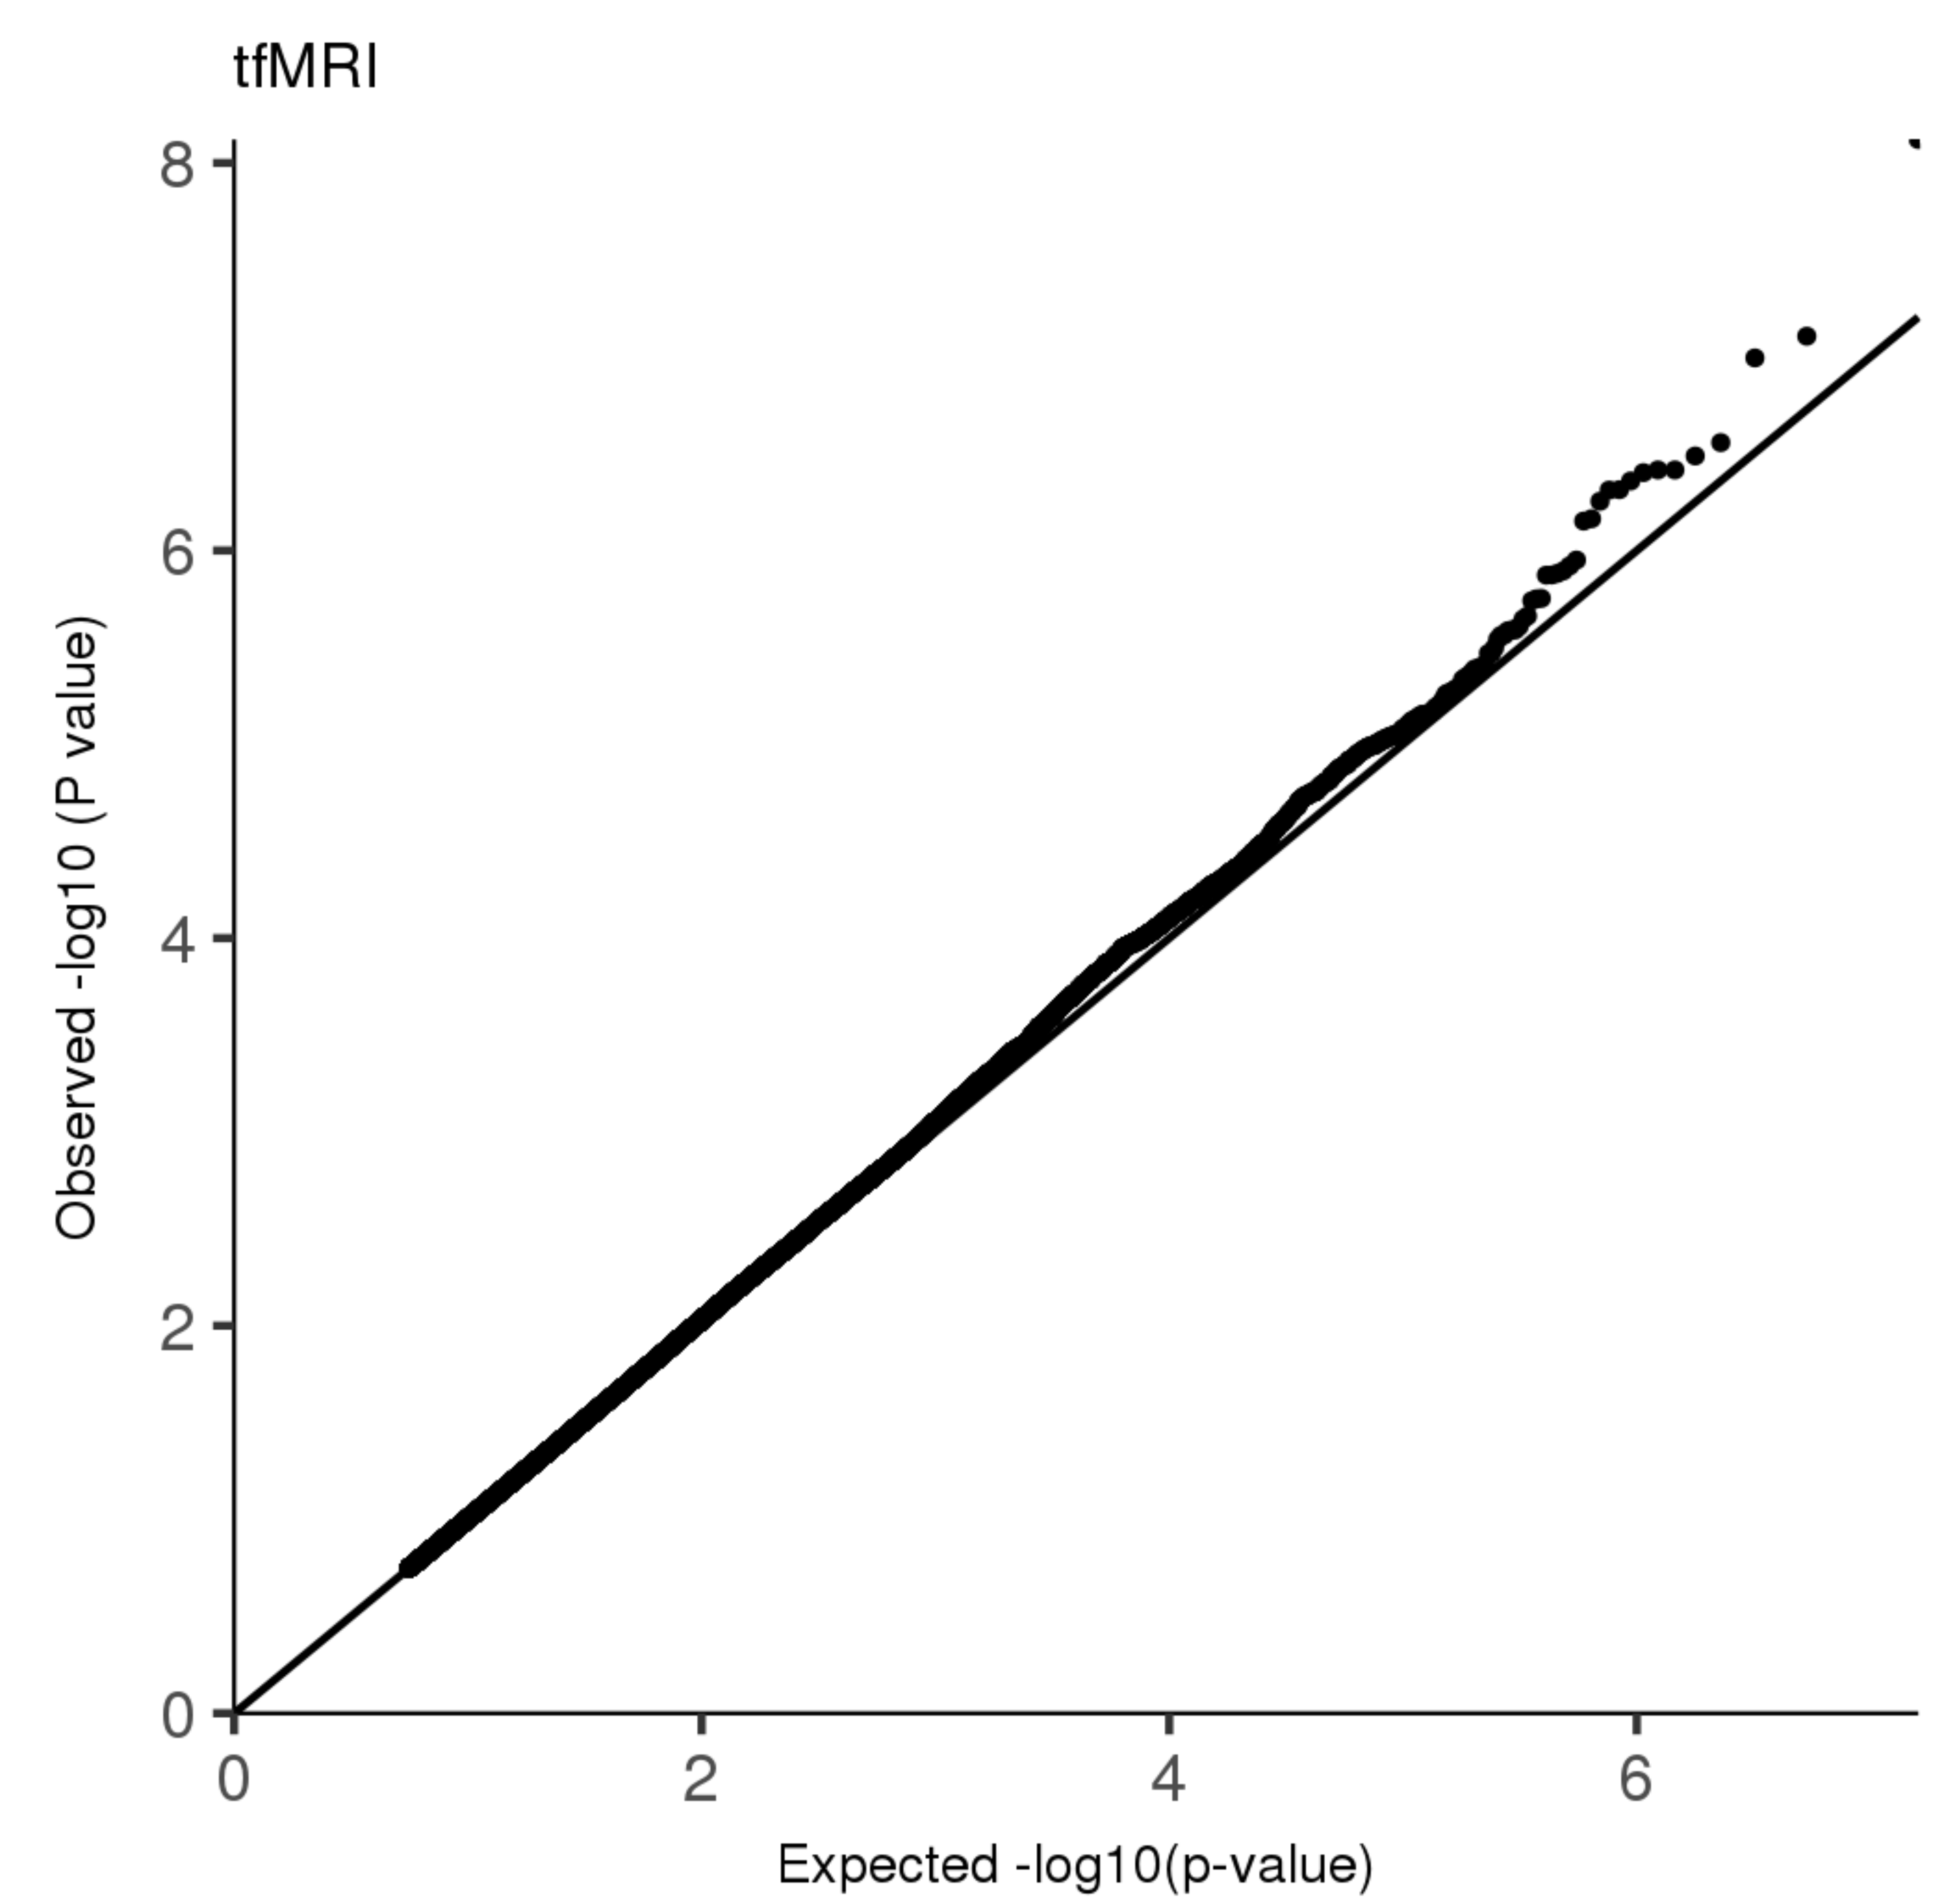

rfMRI 25

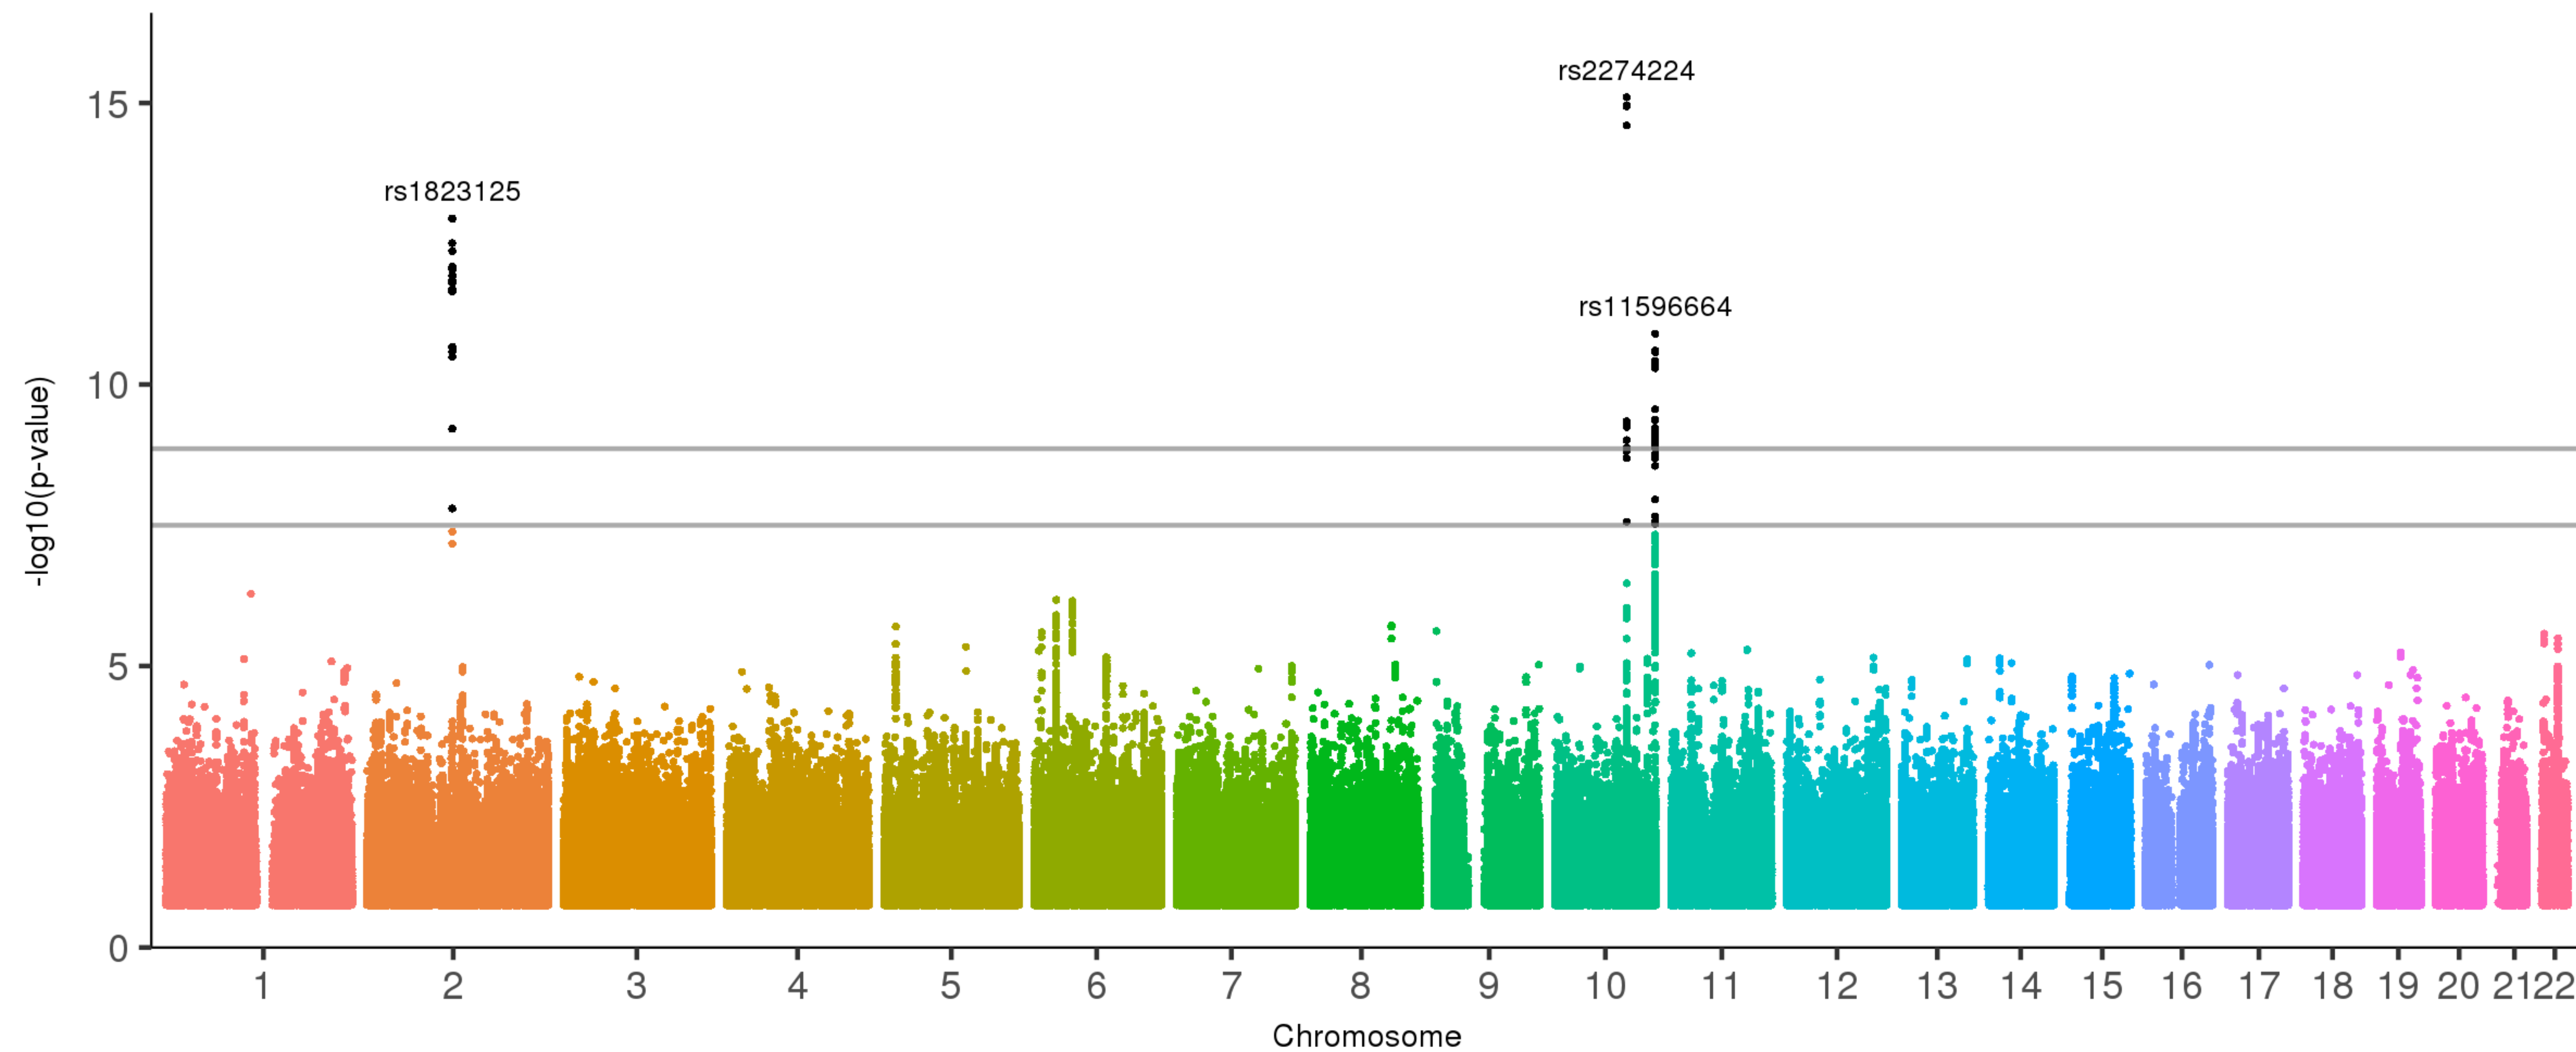

rfMRI 25

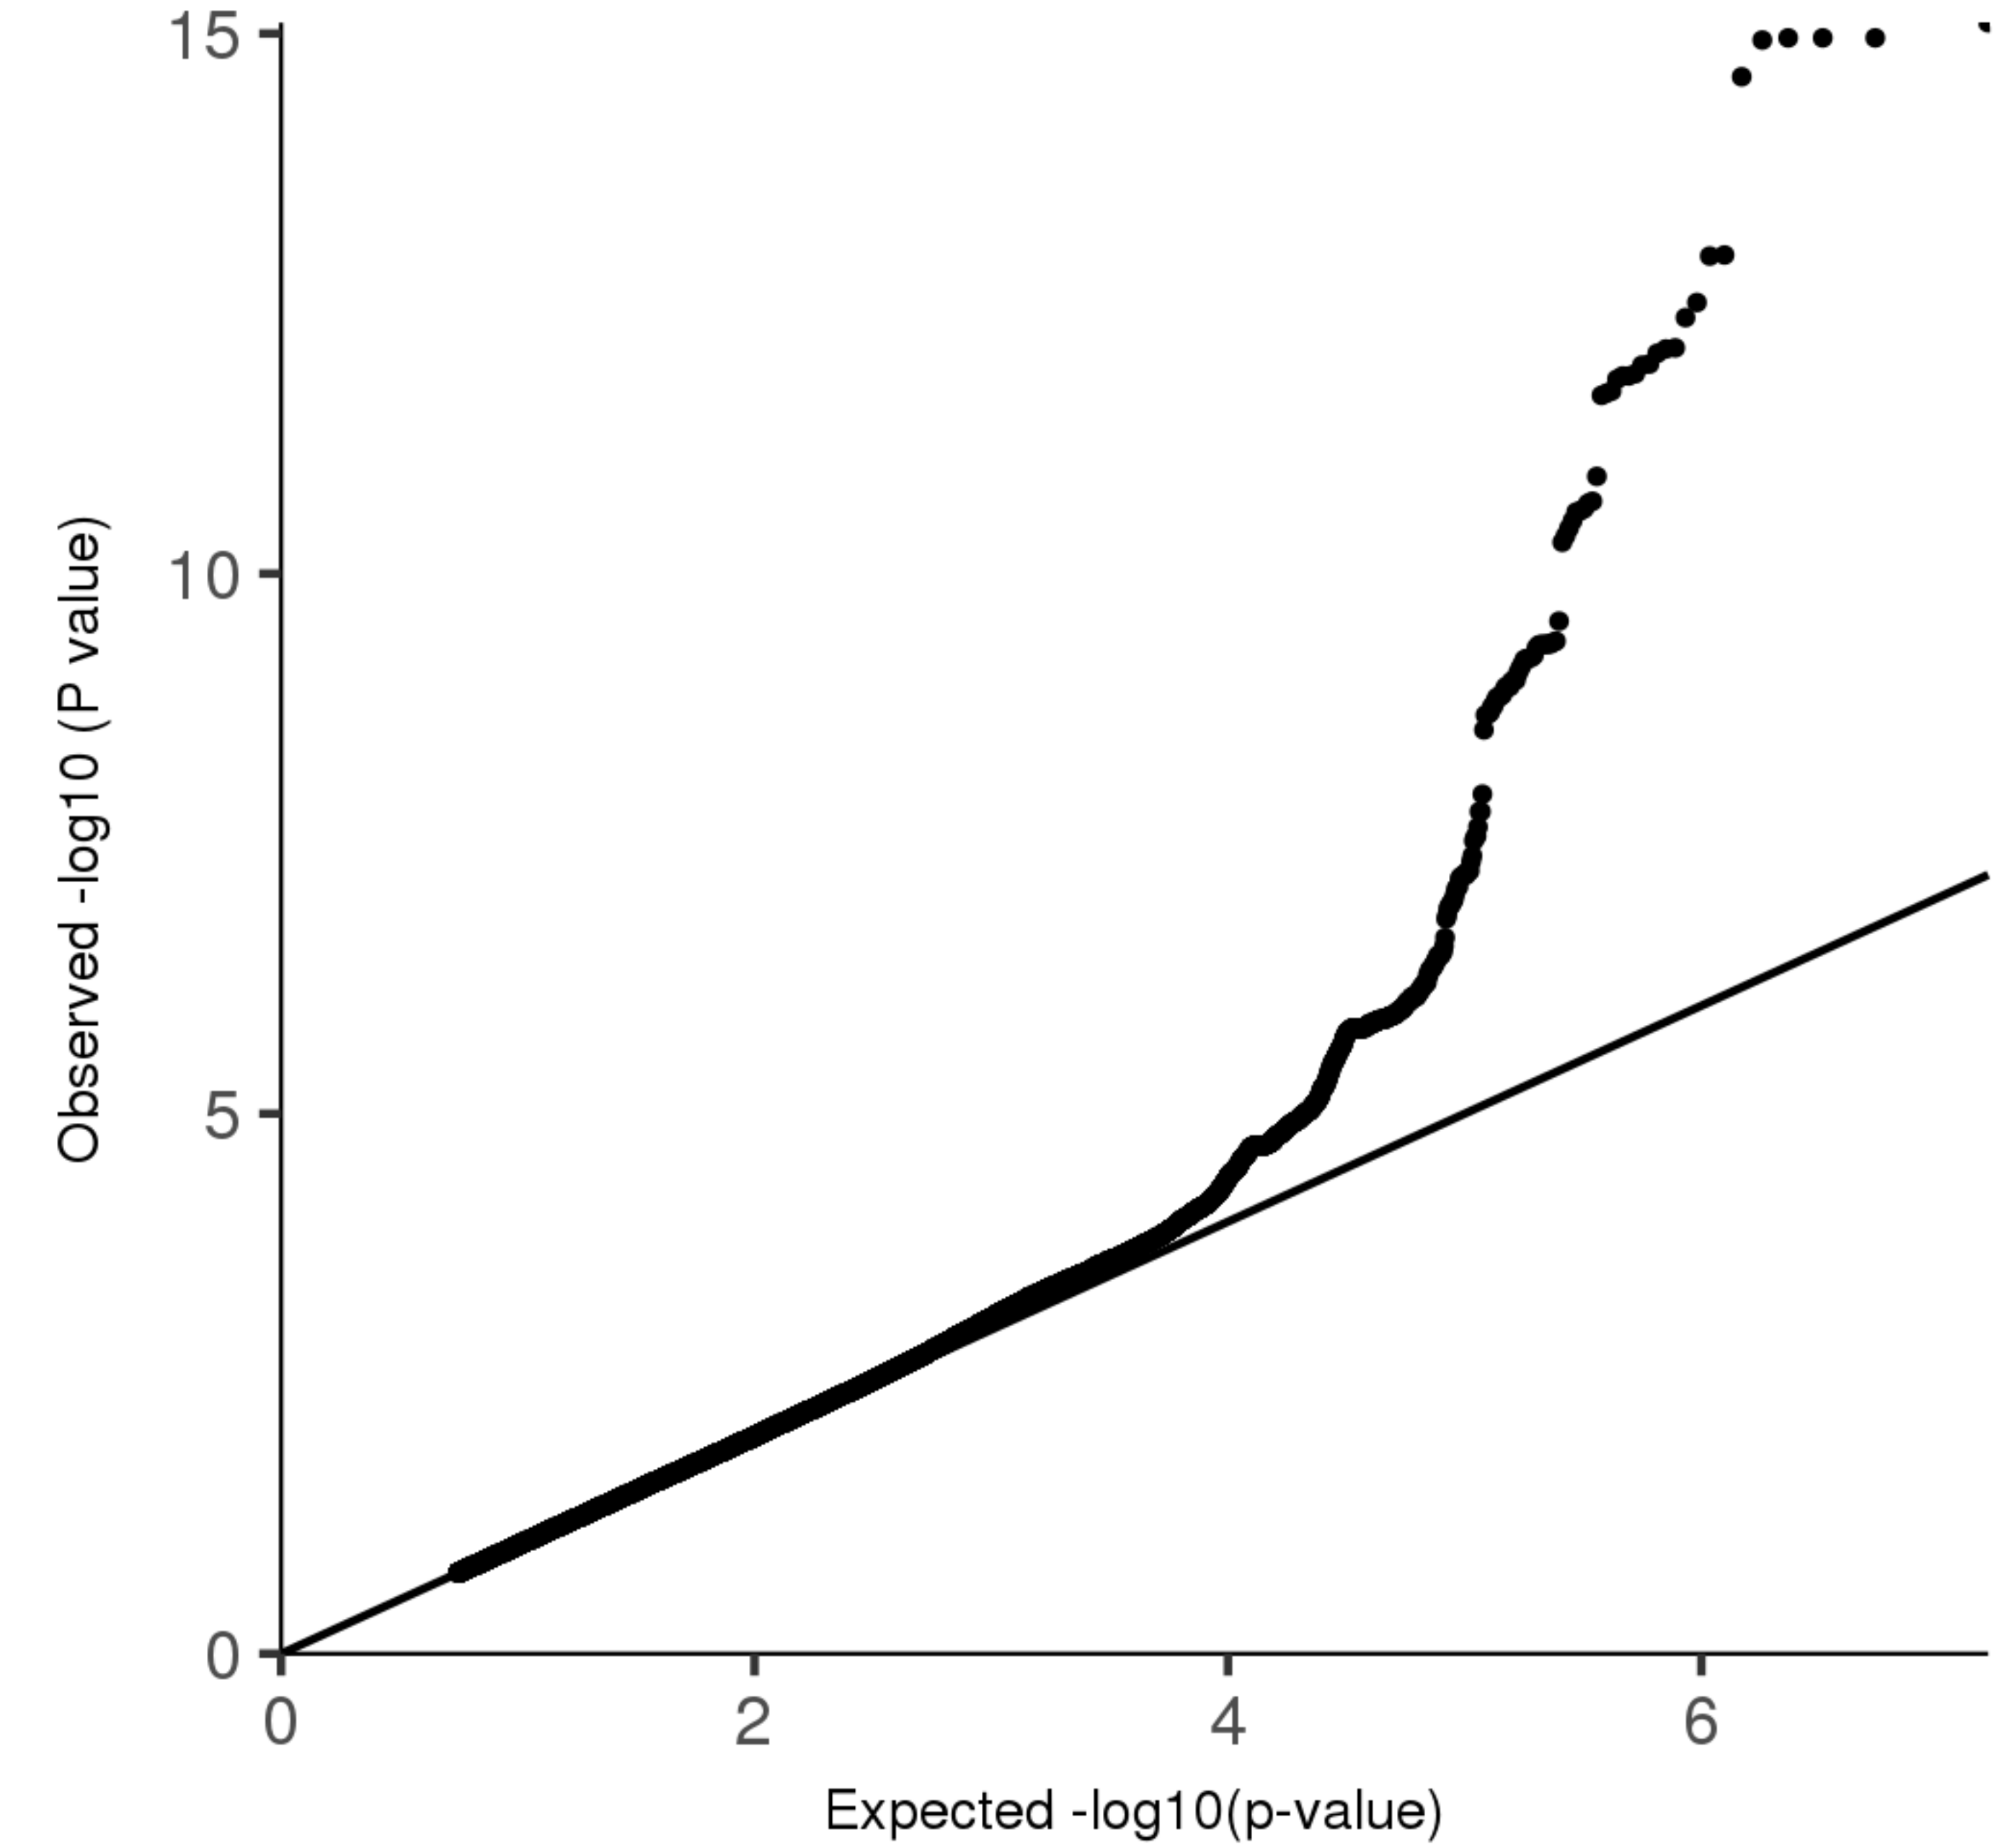

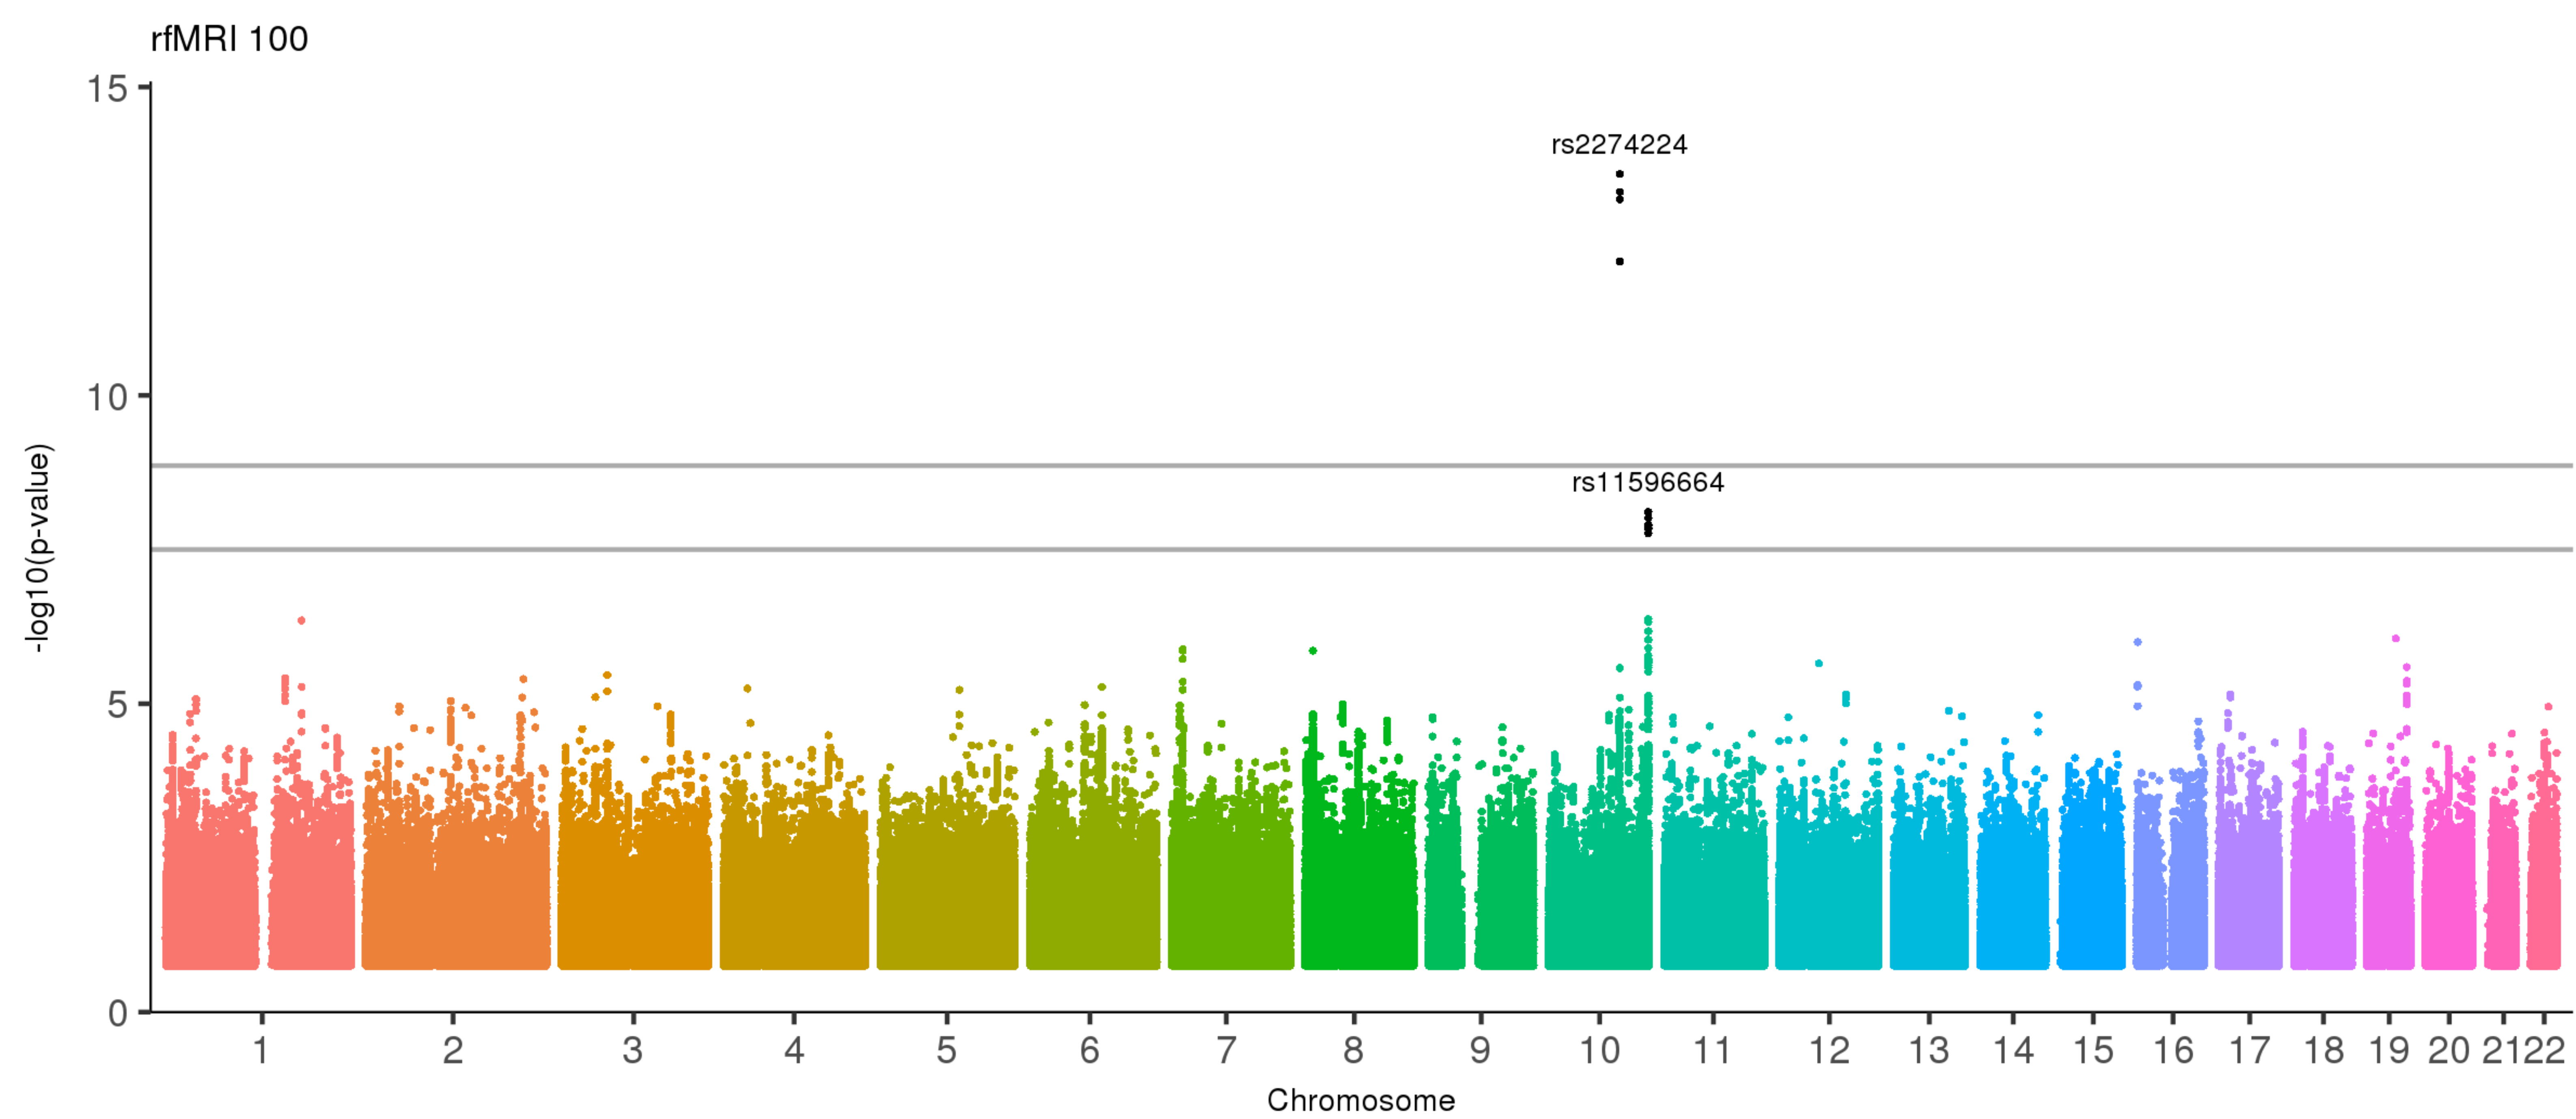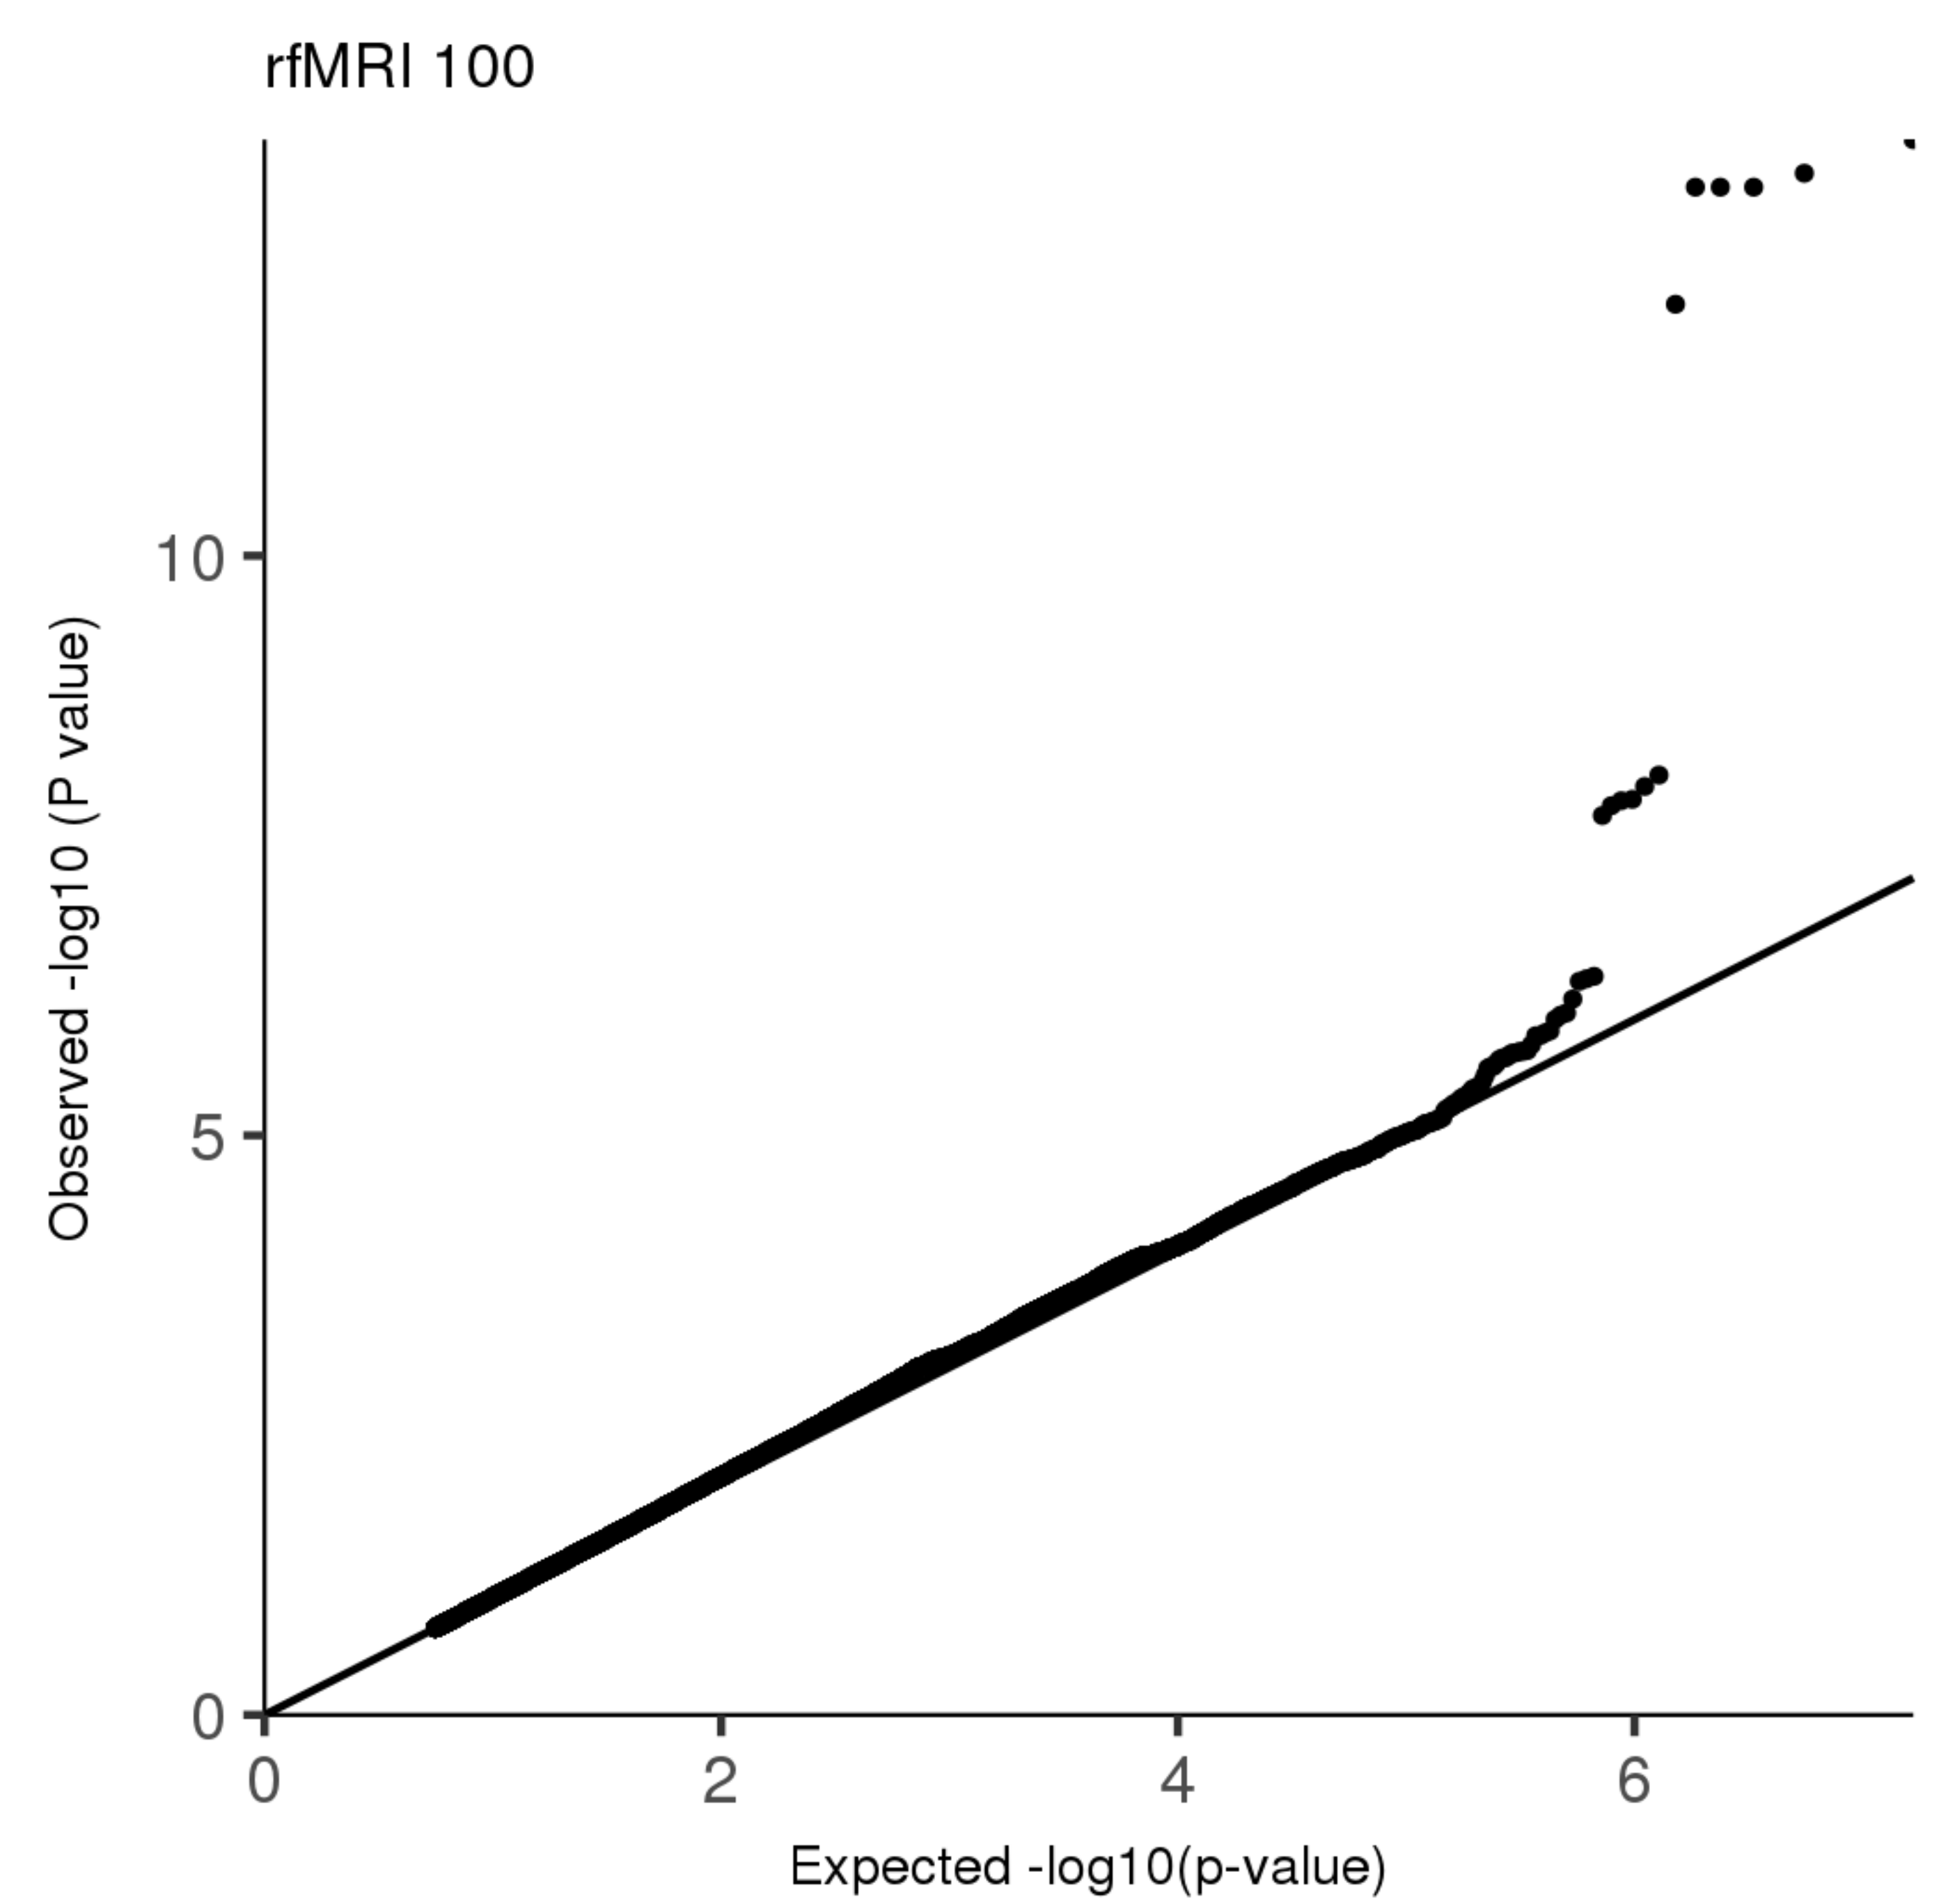

T1 FAST ROIs

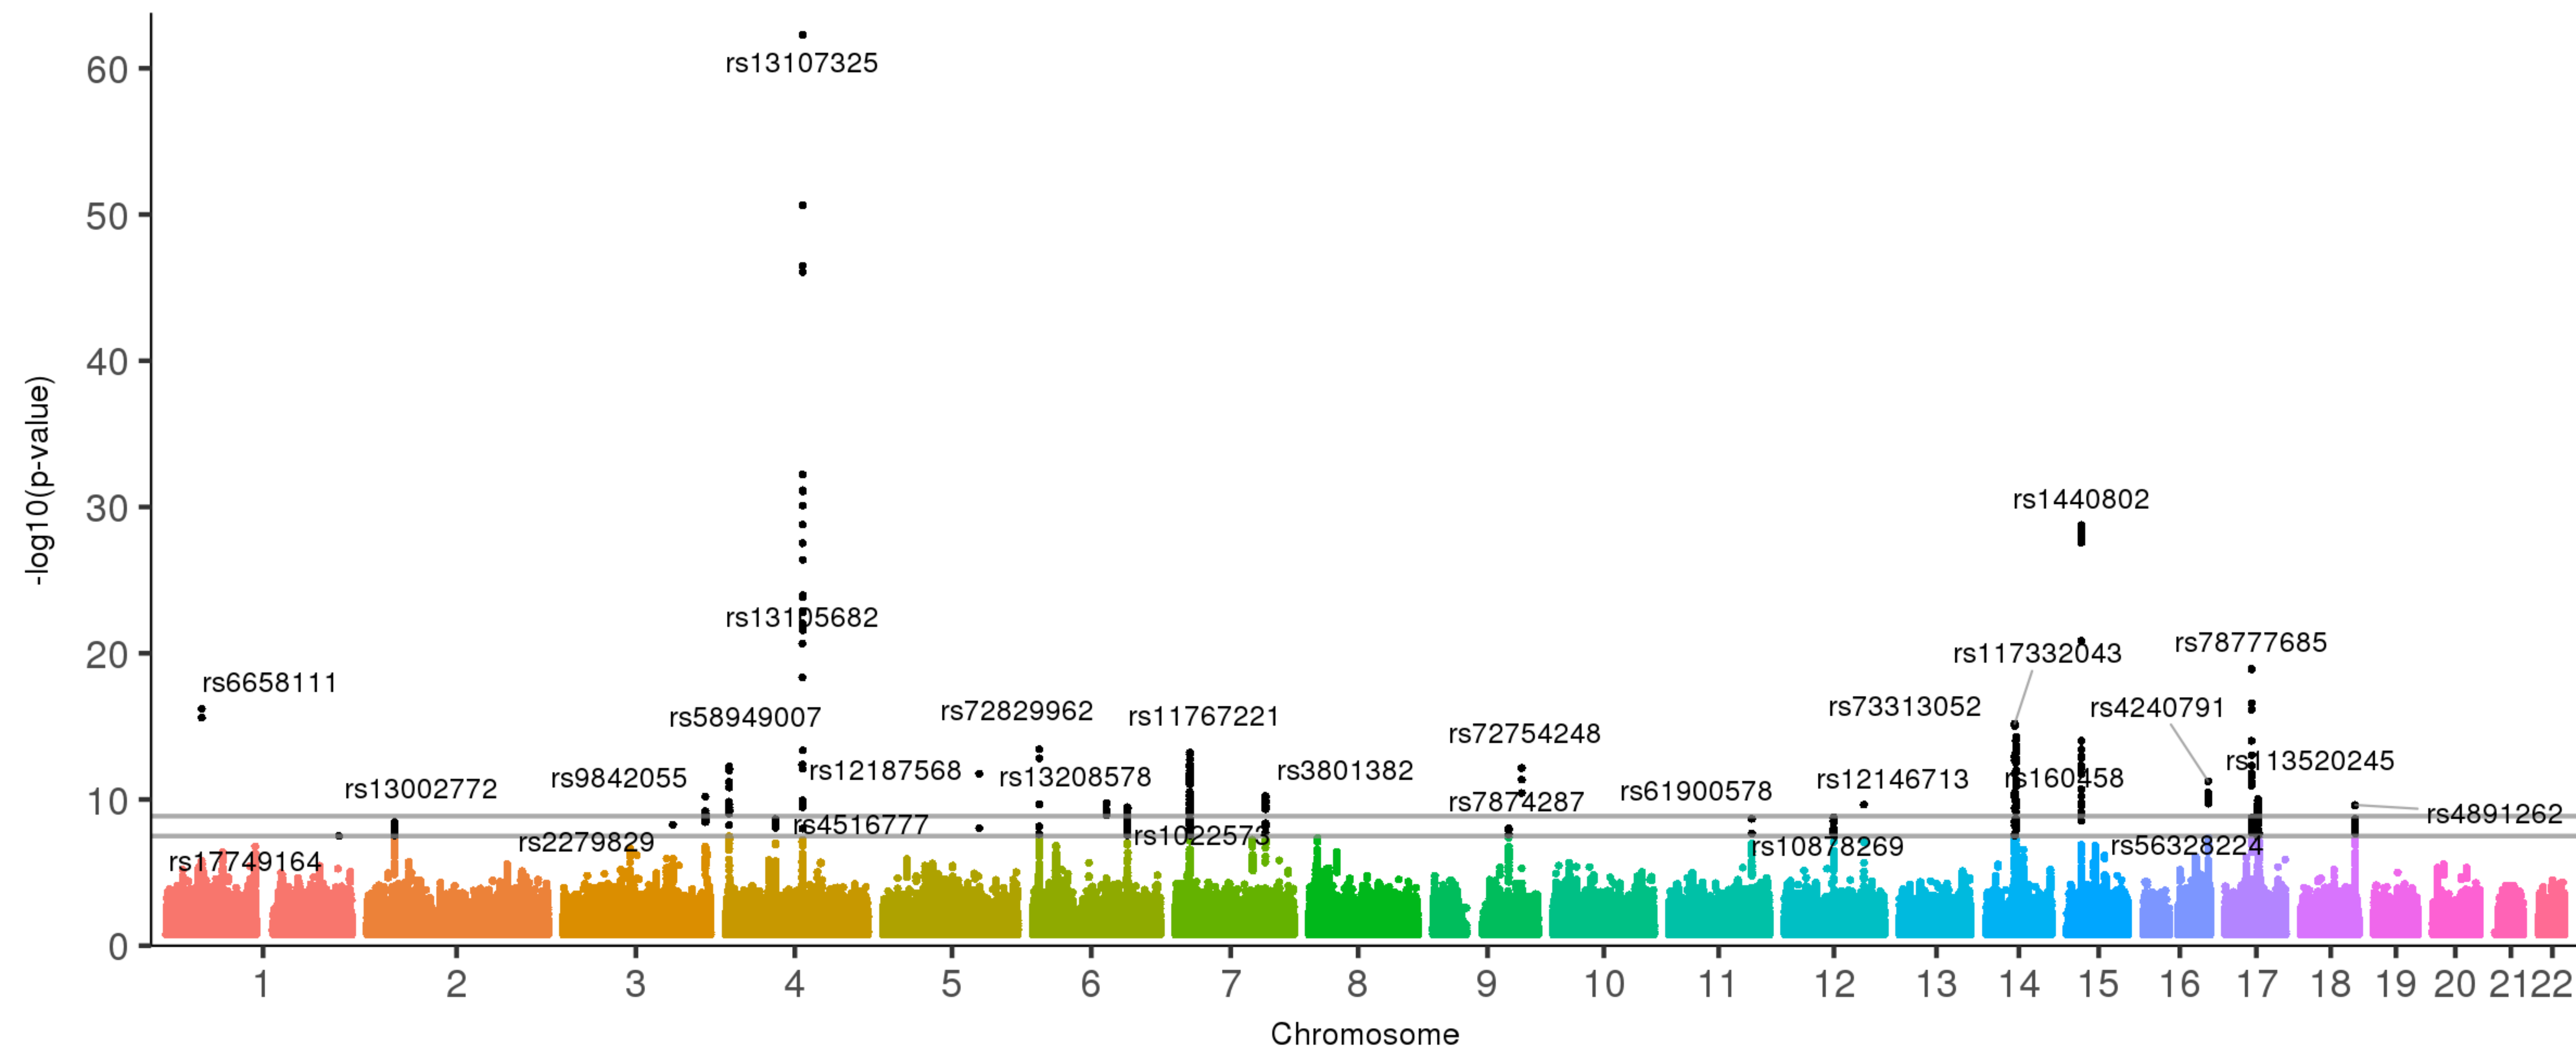

T1 FAST ROIs

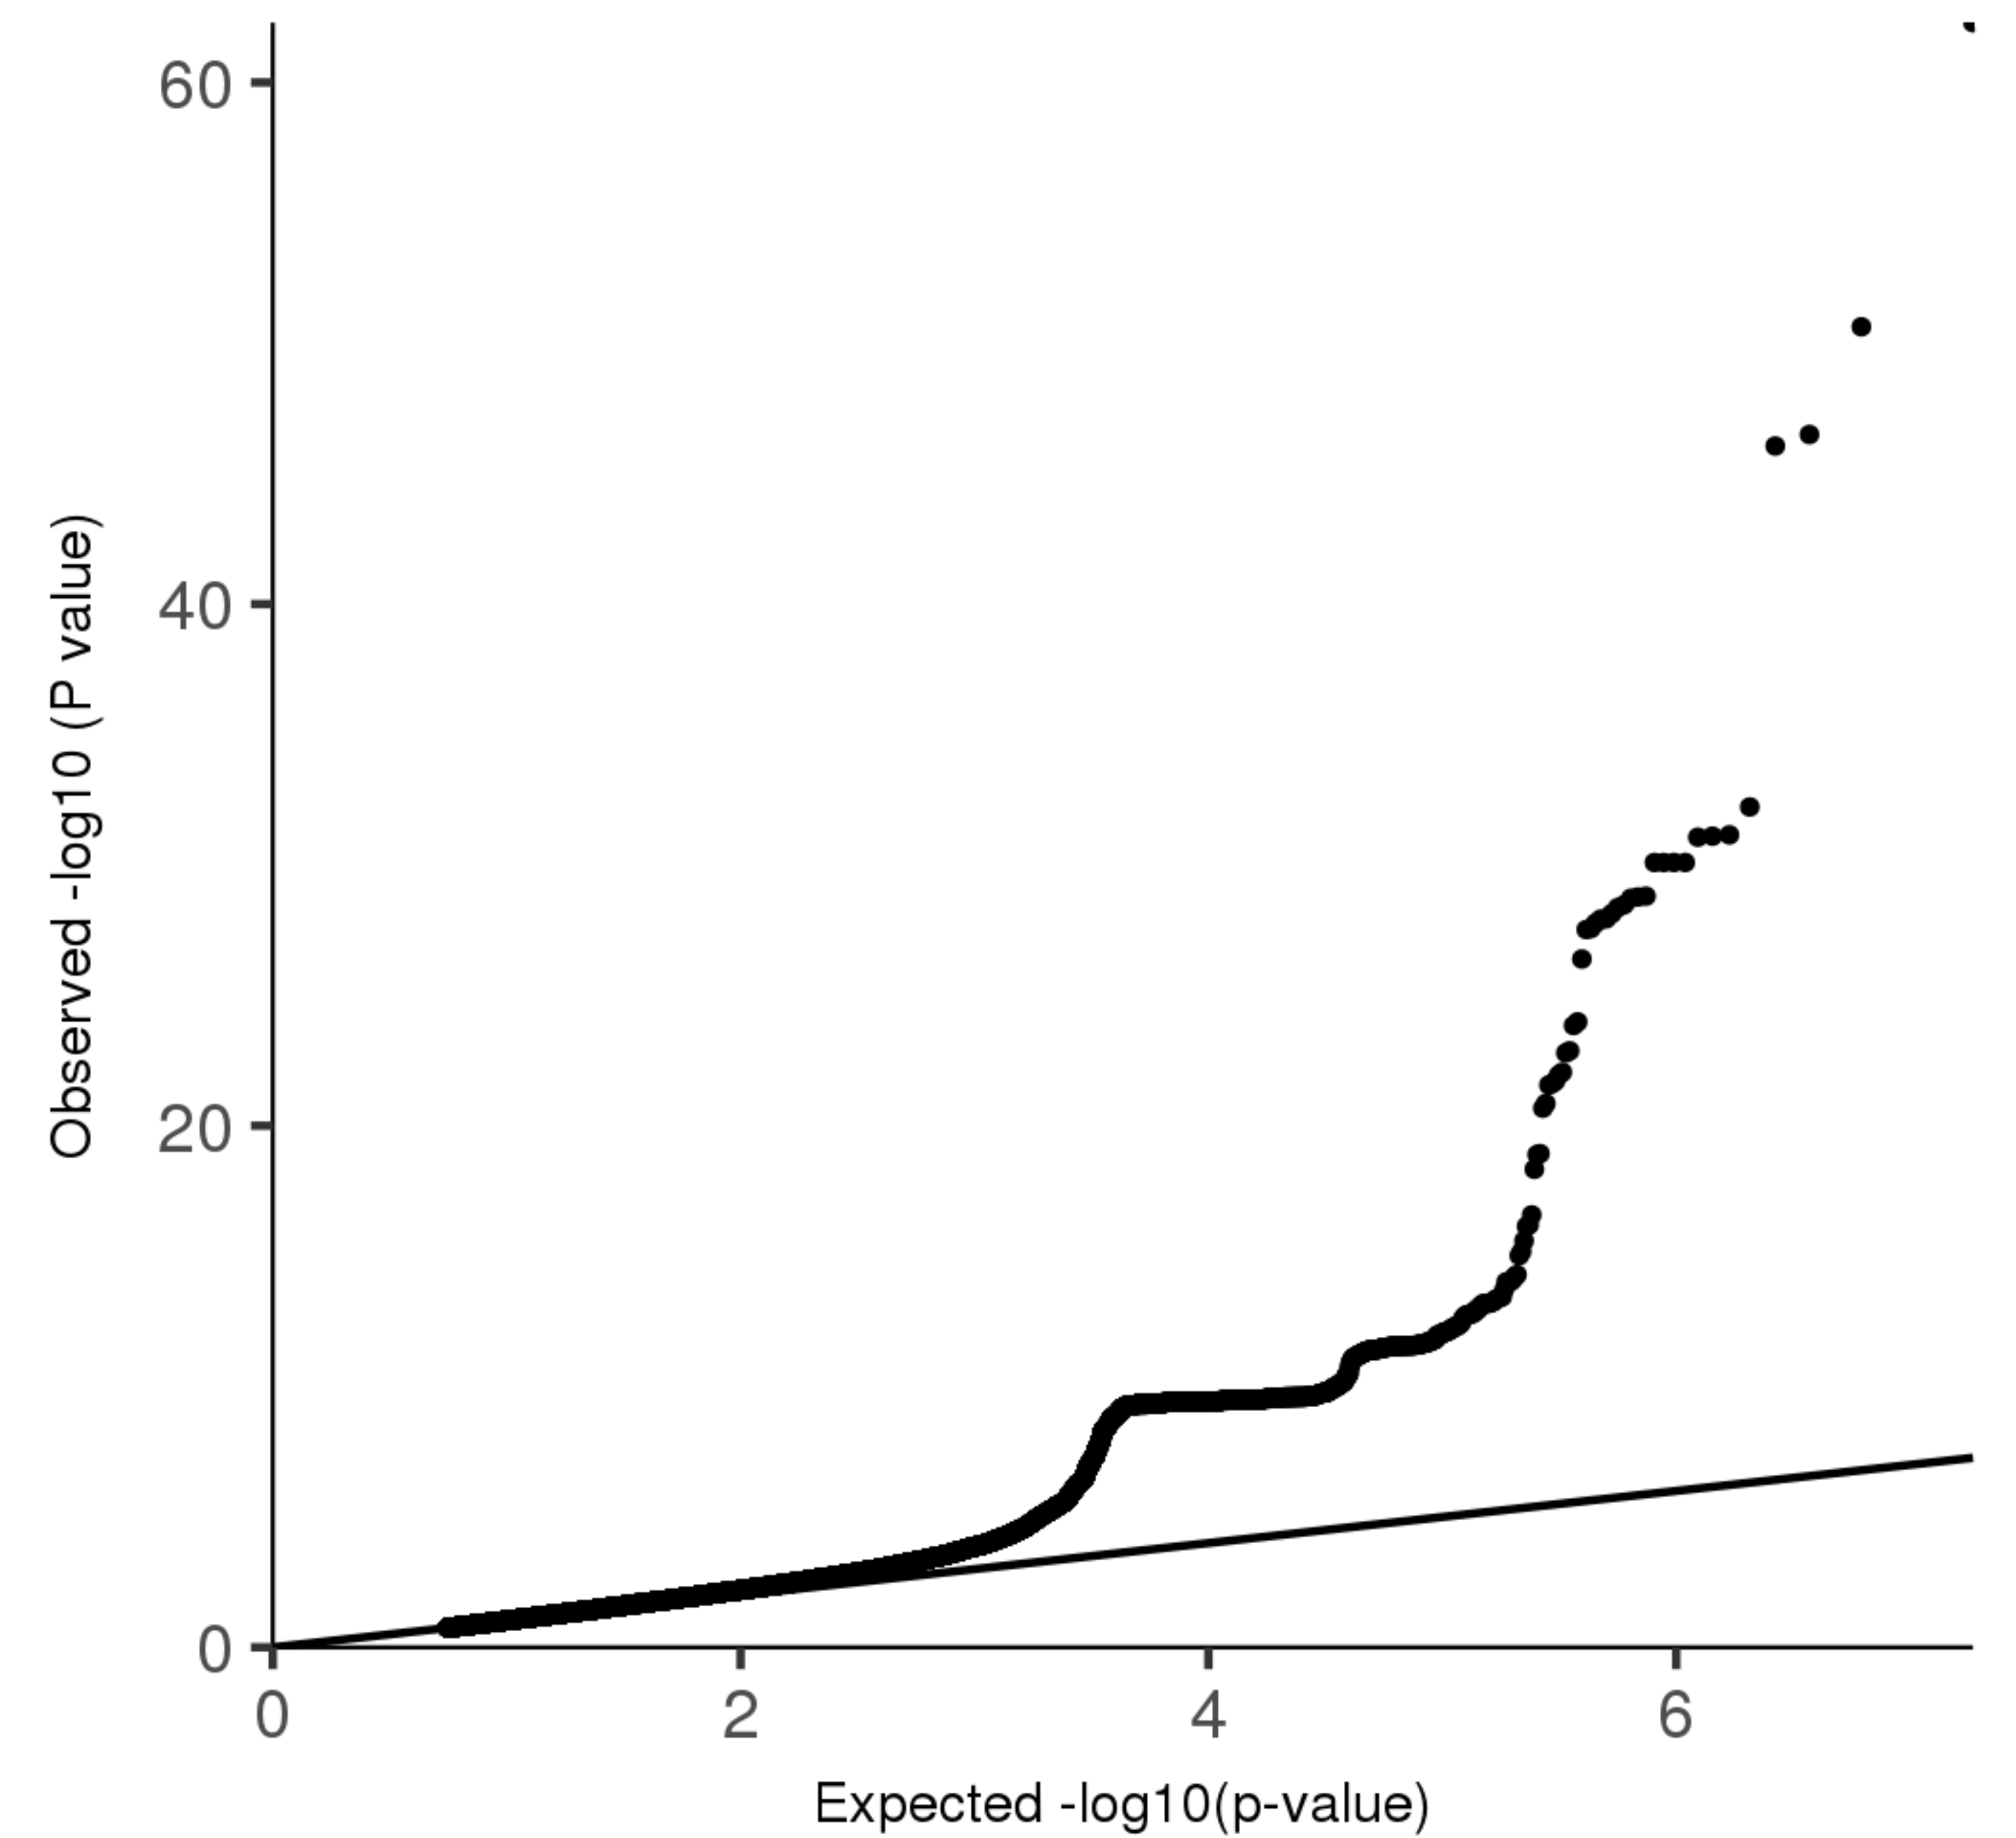

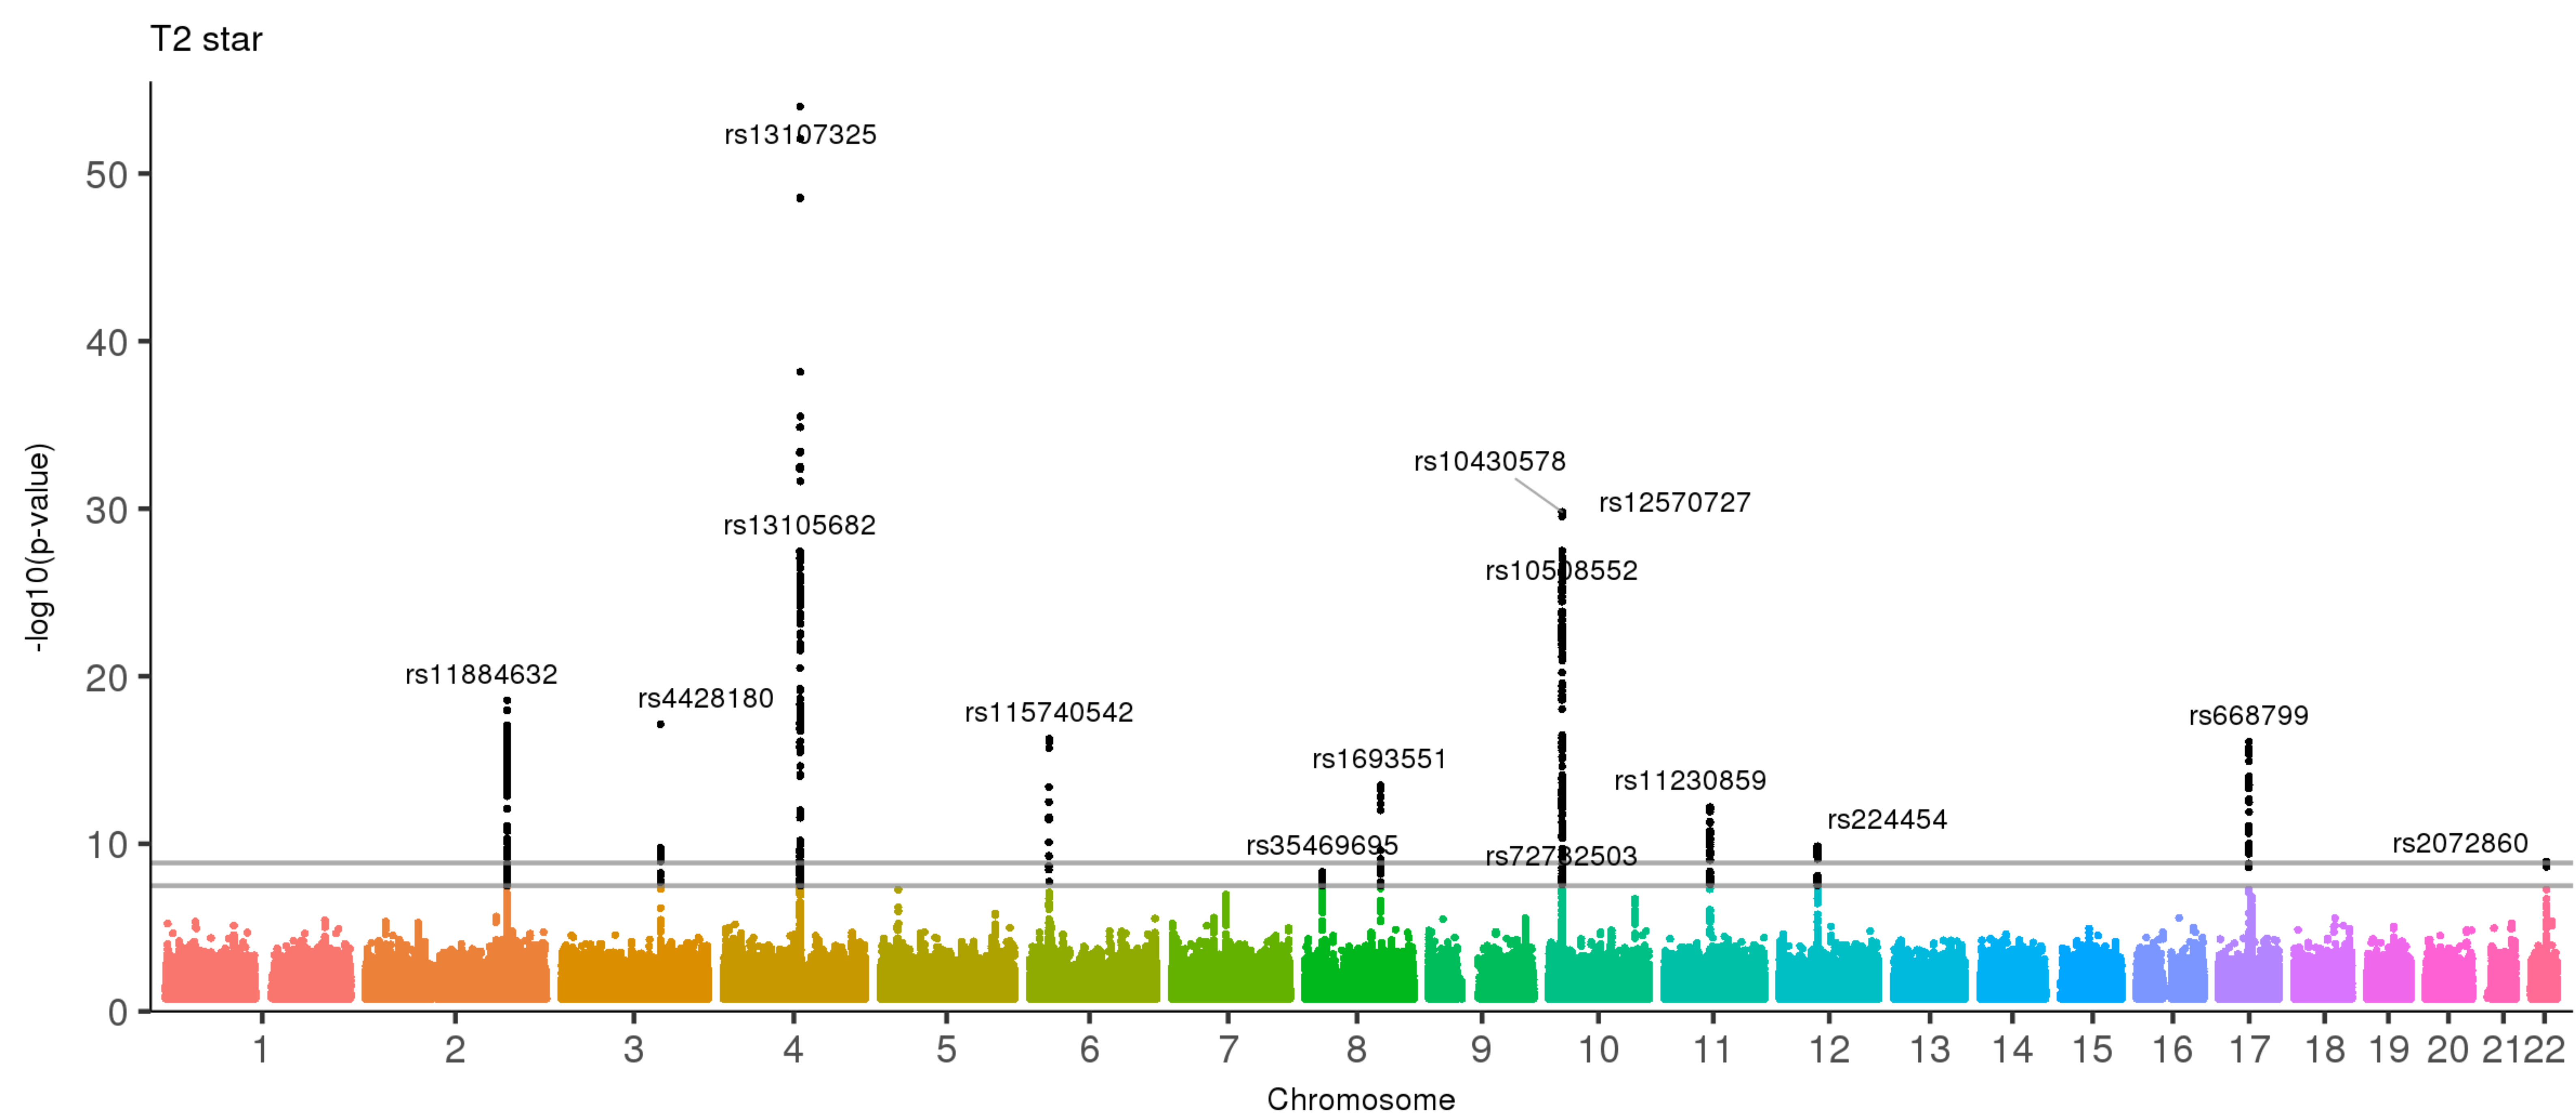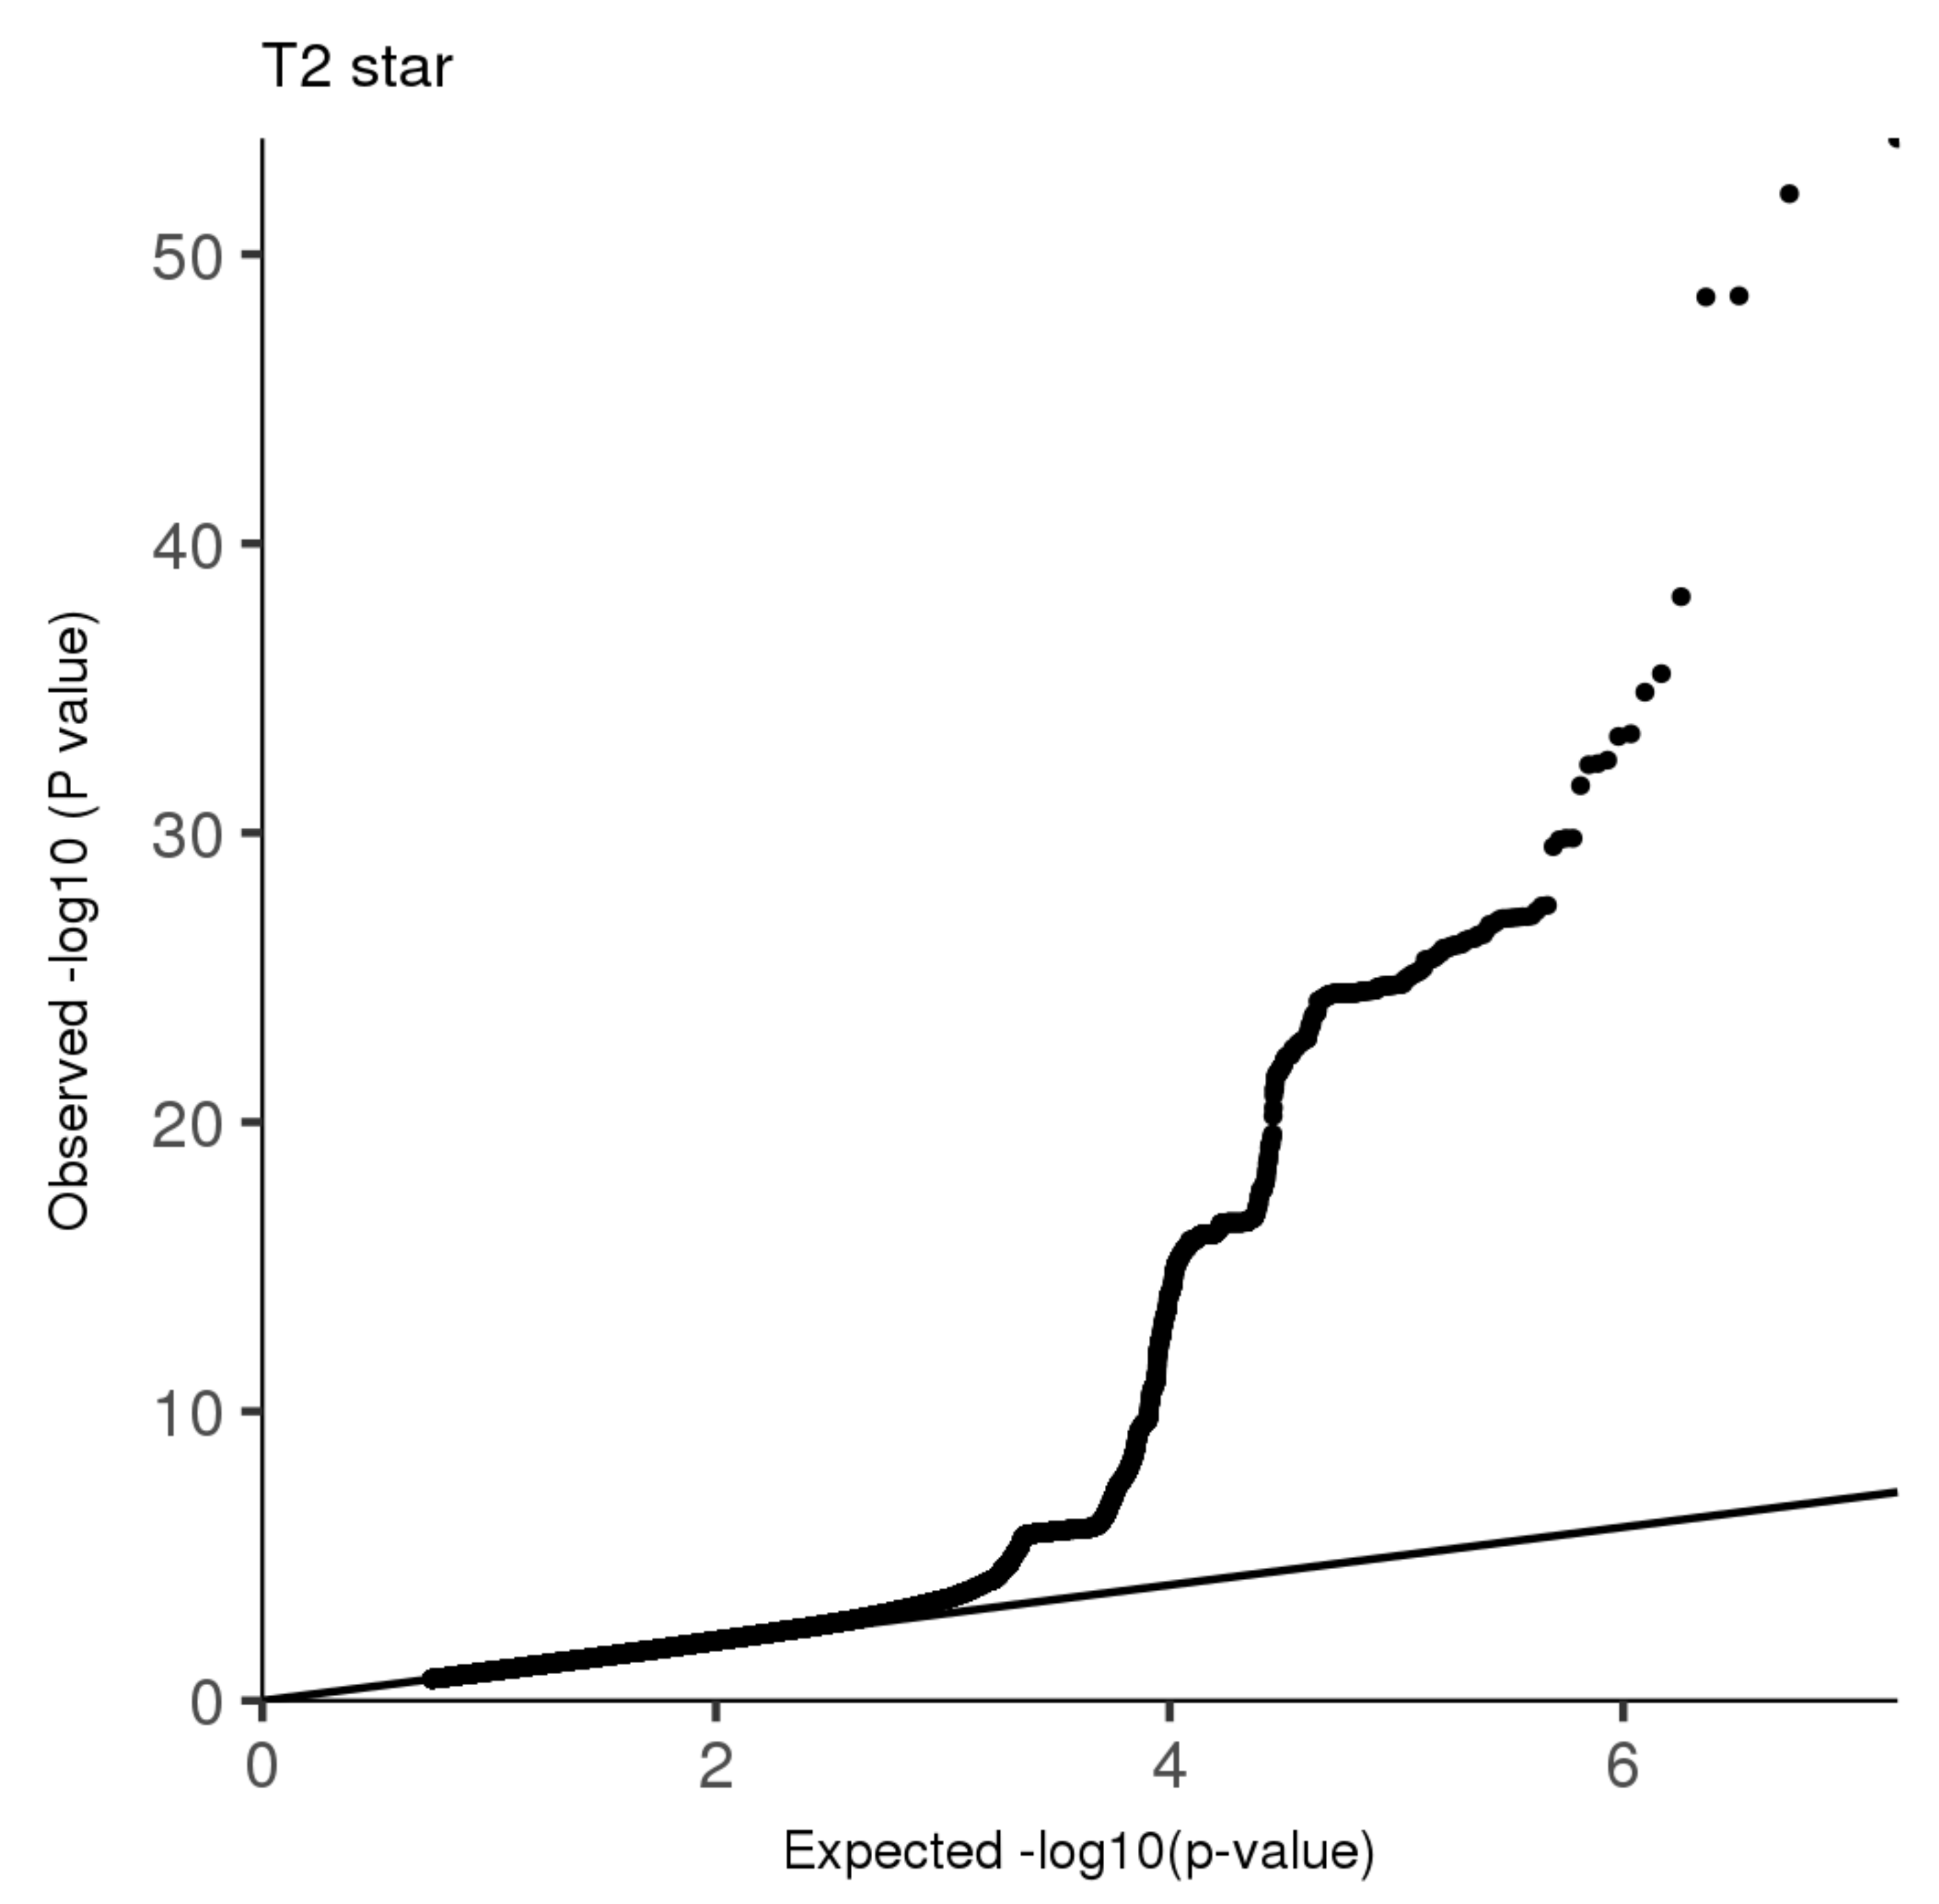

T1 Subcortical all

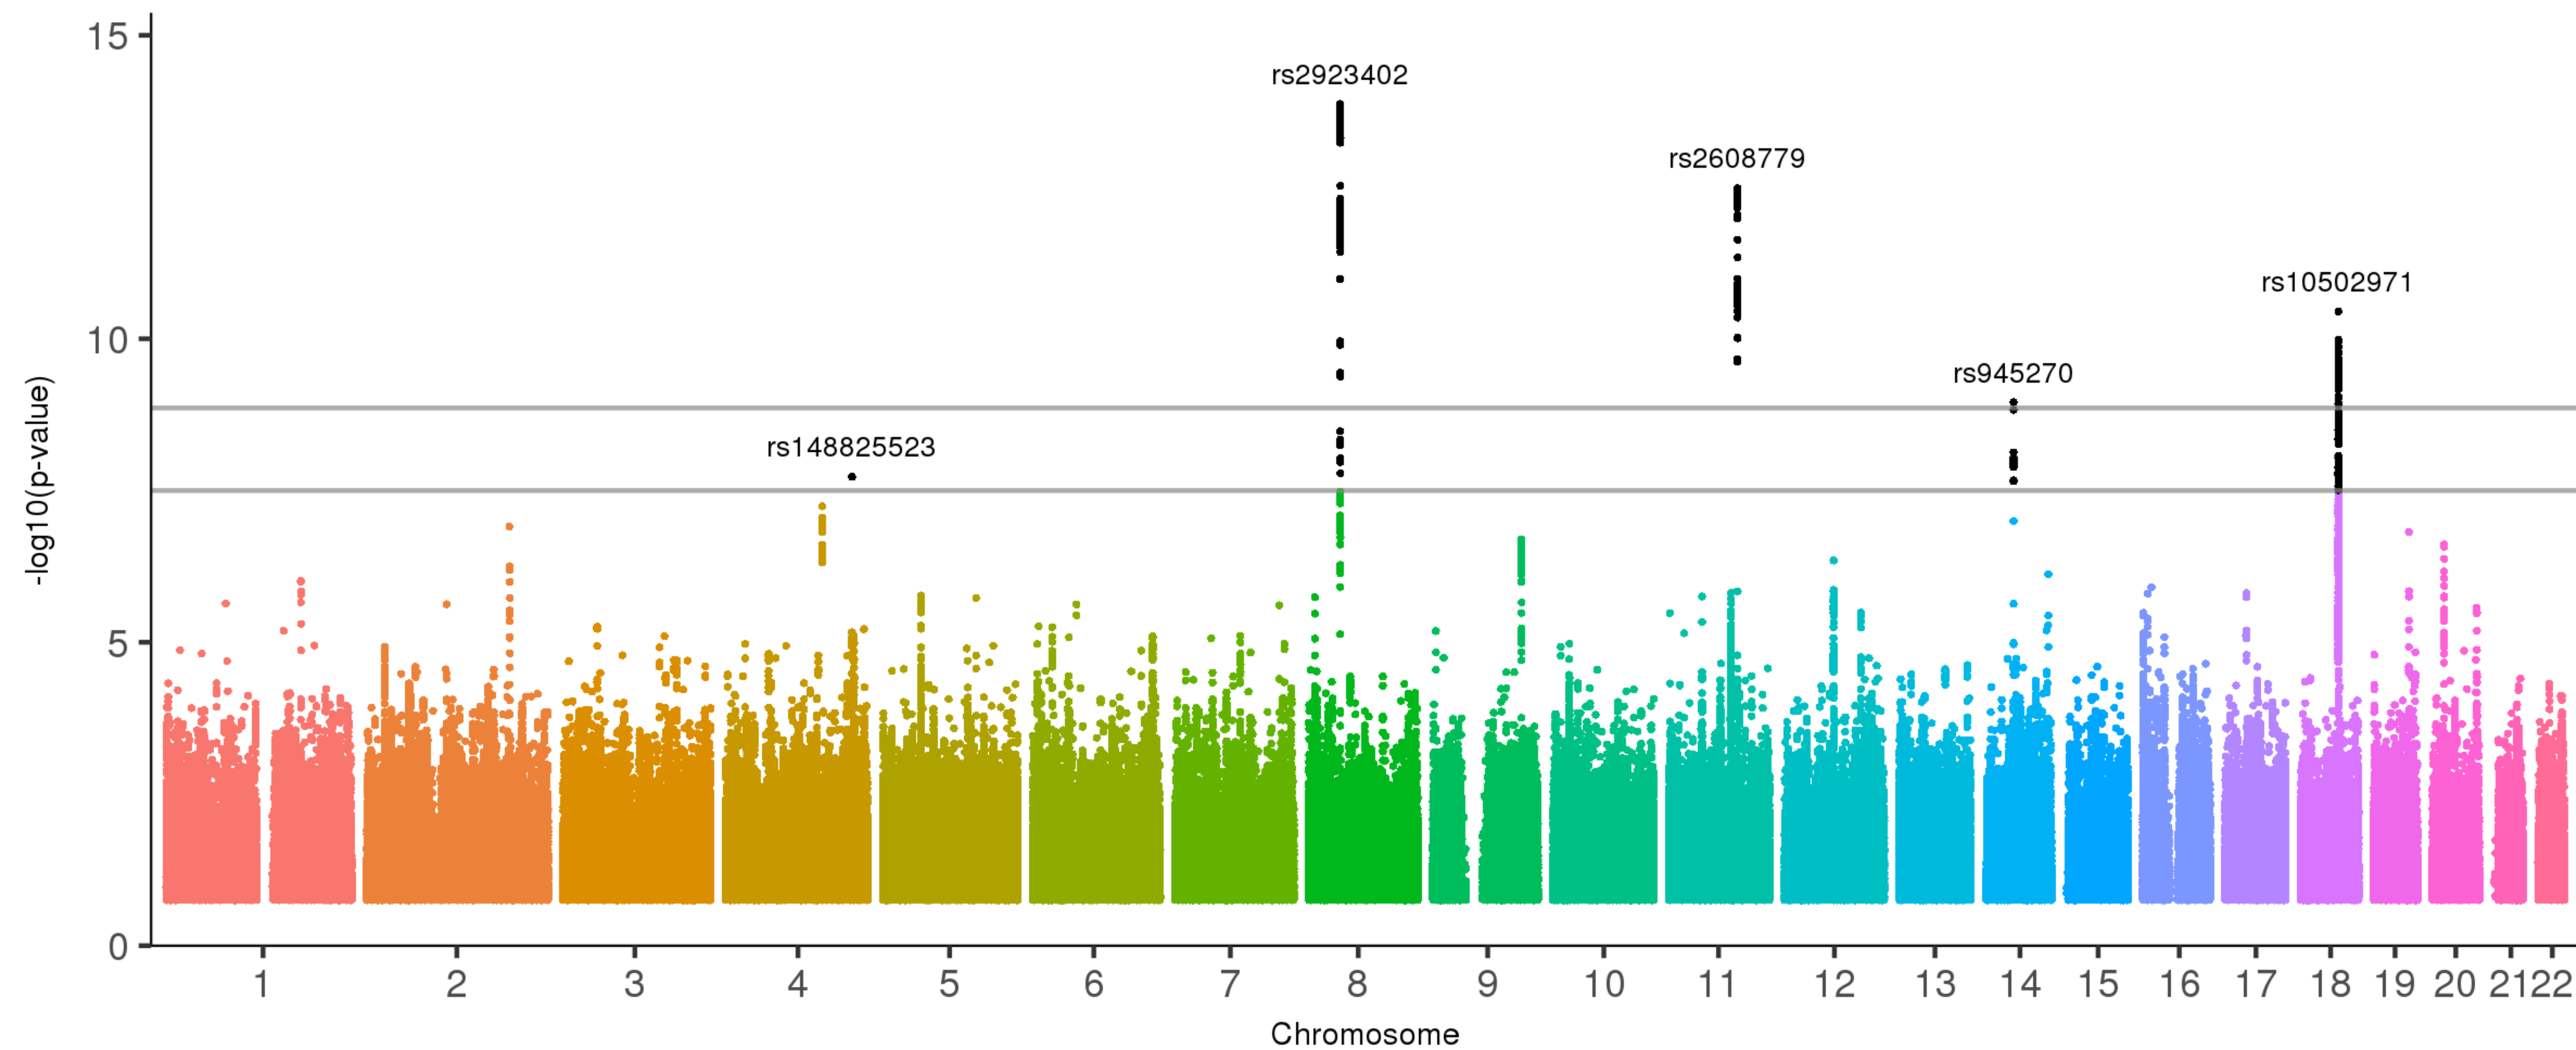

T1 Subcortical all

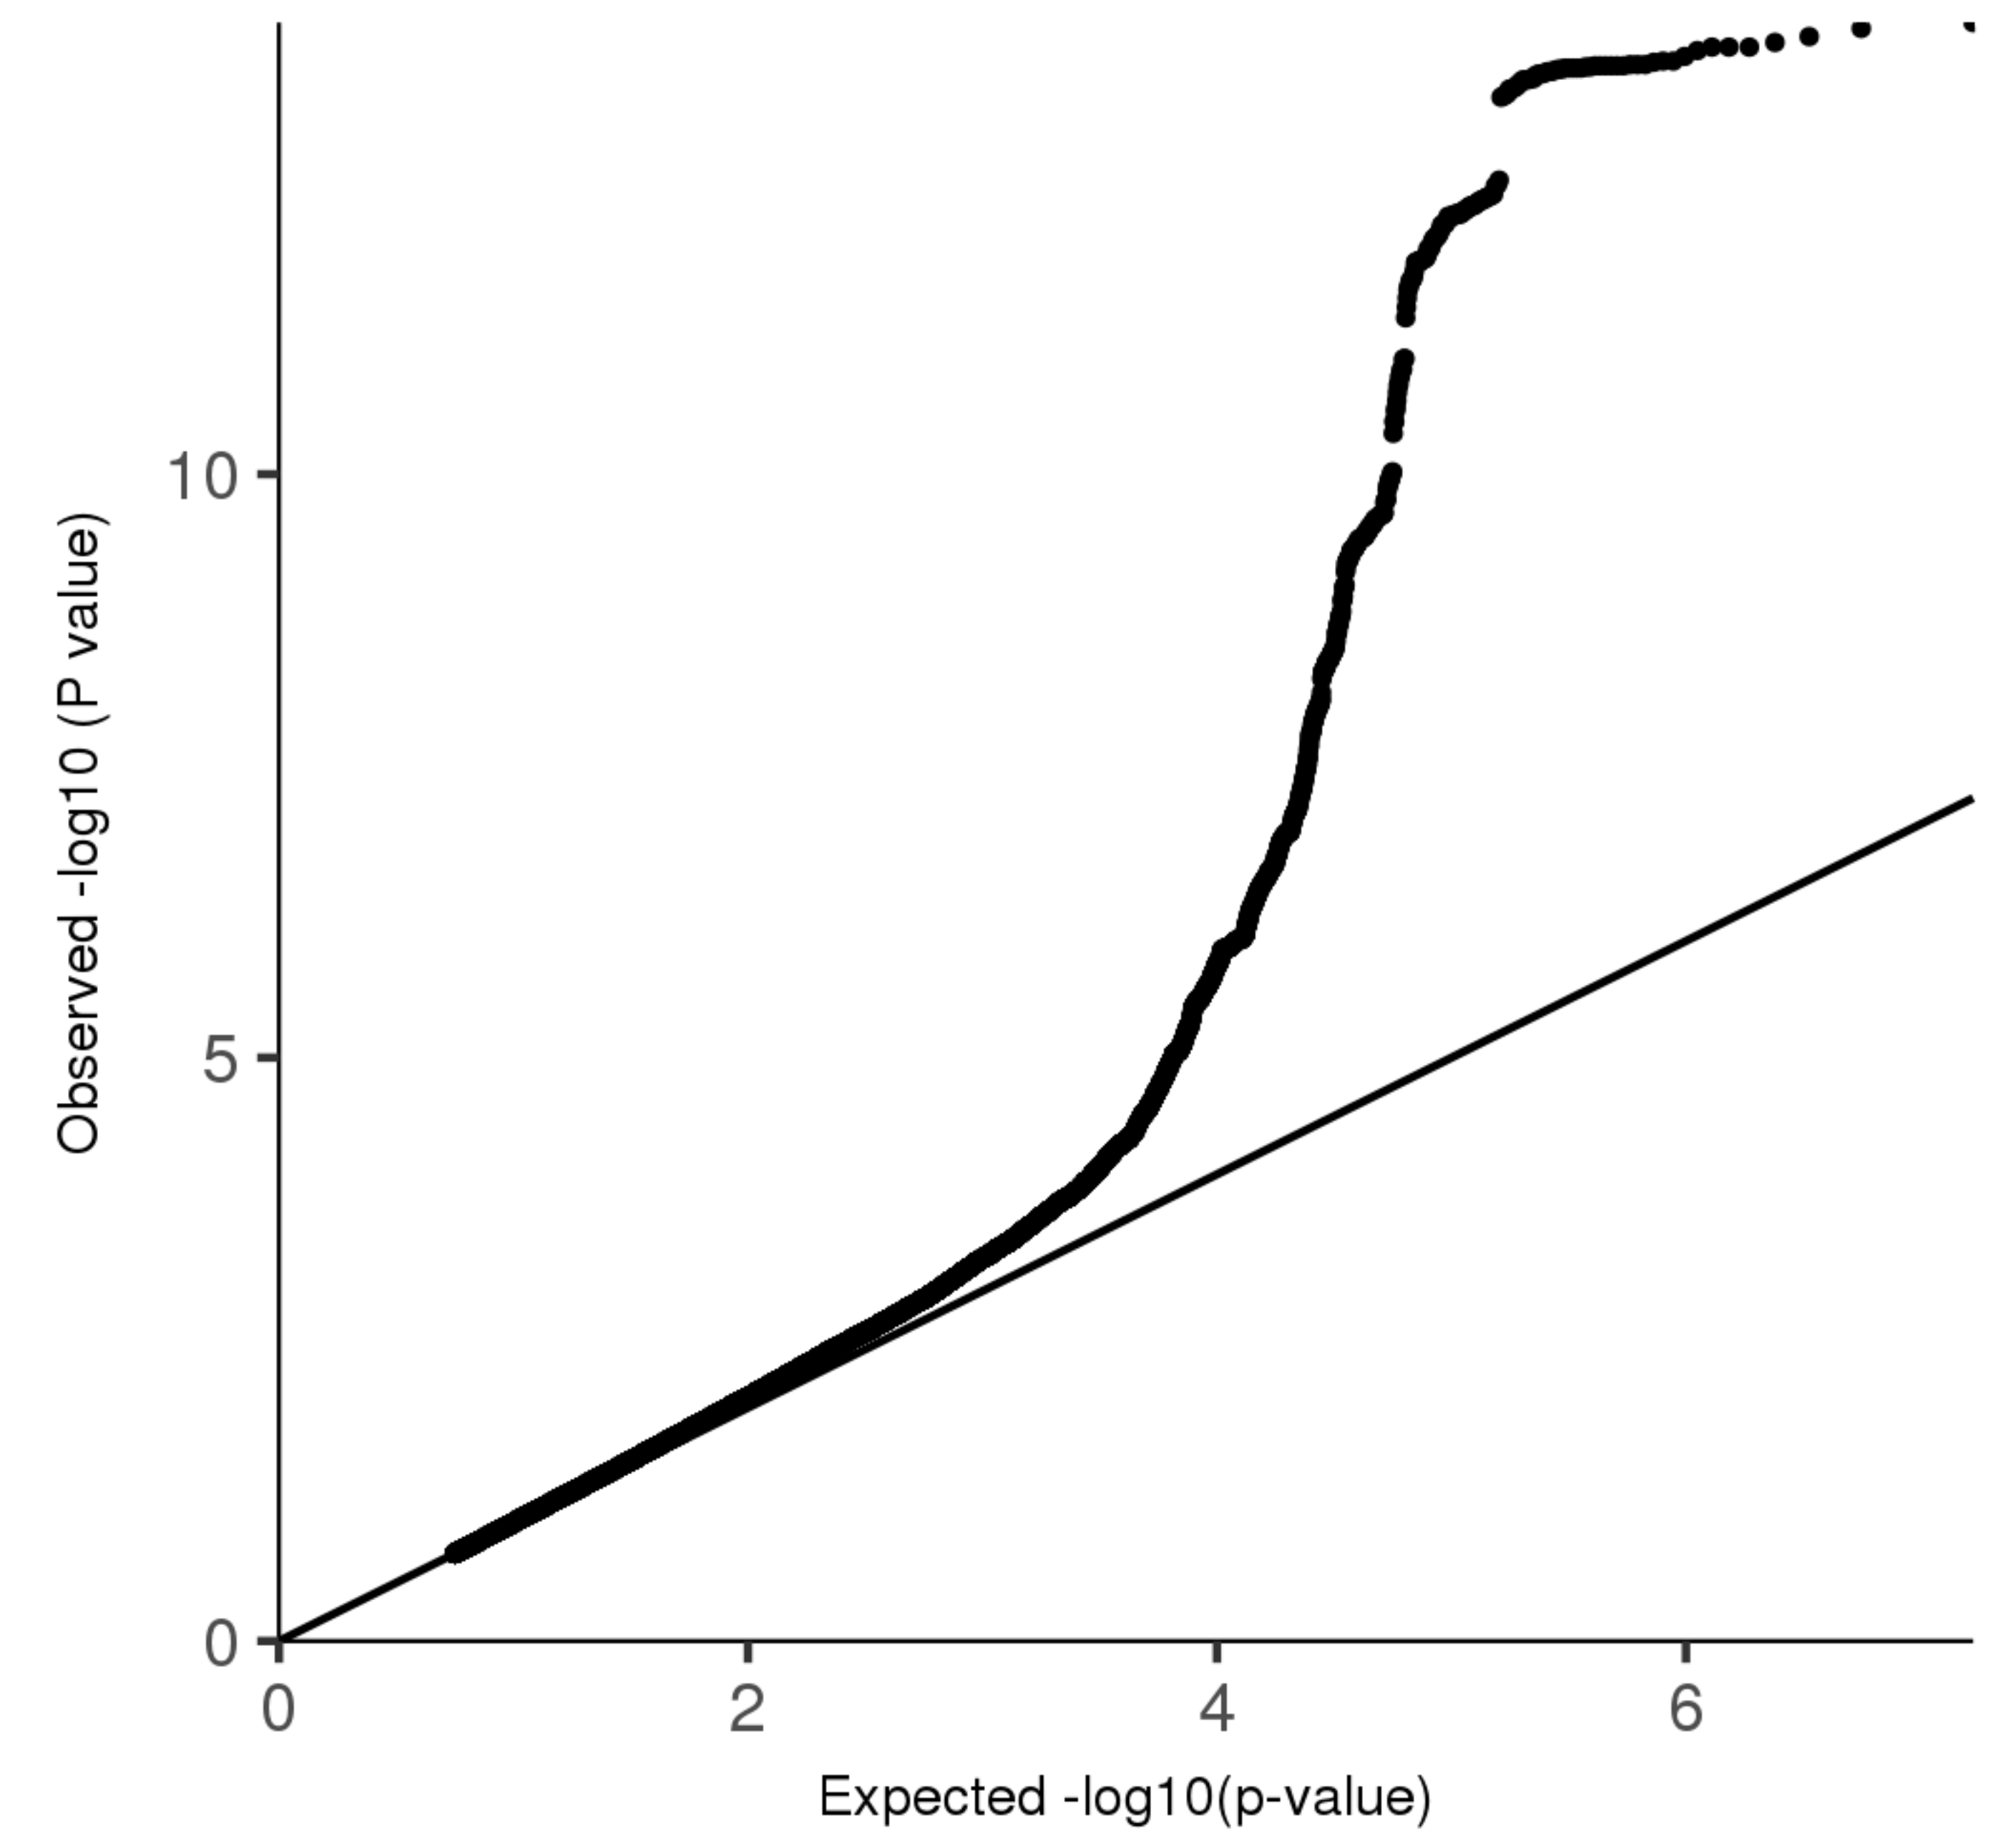



T1 brain vol all

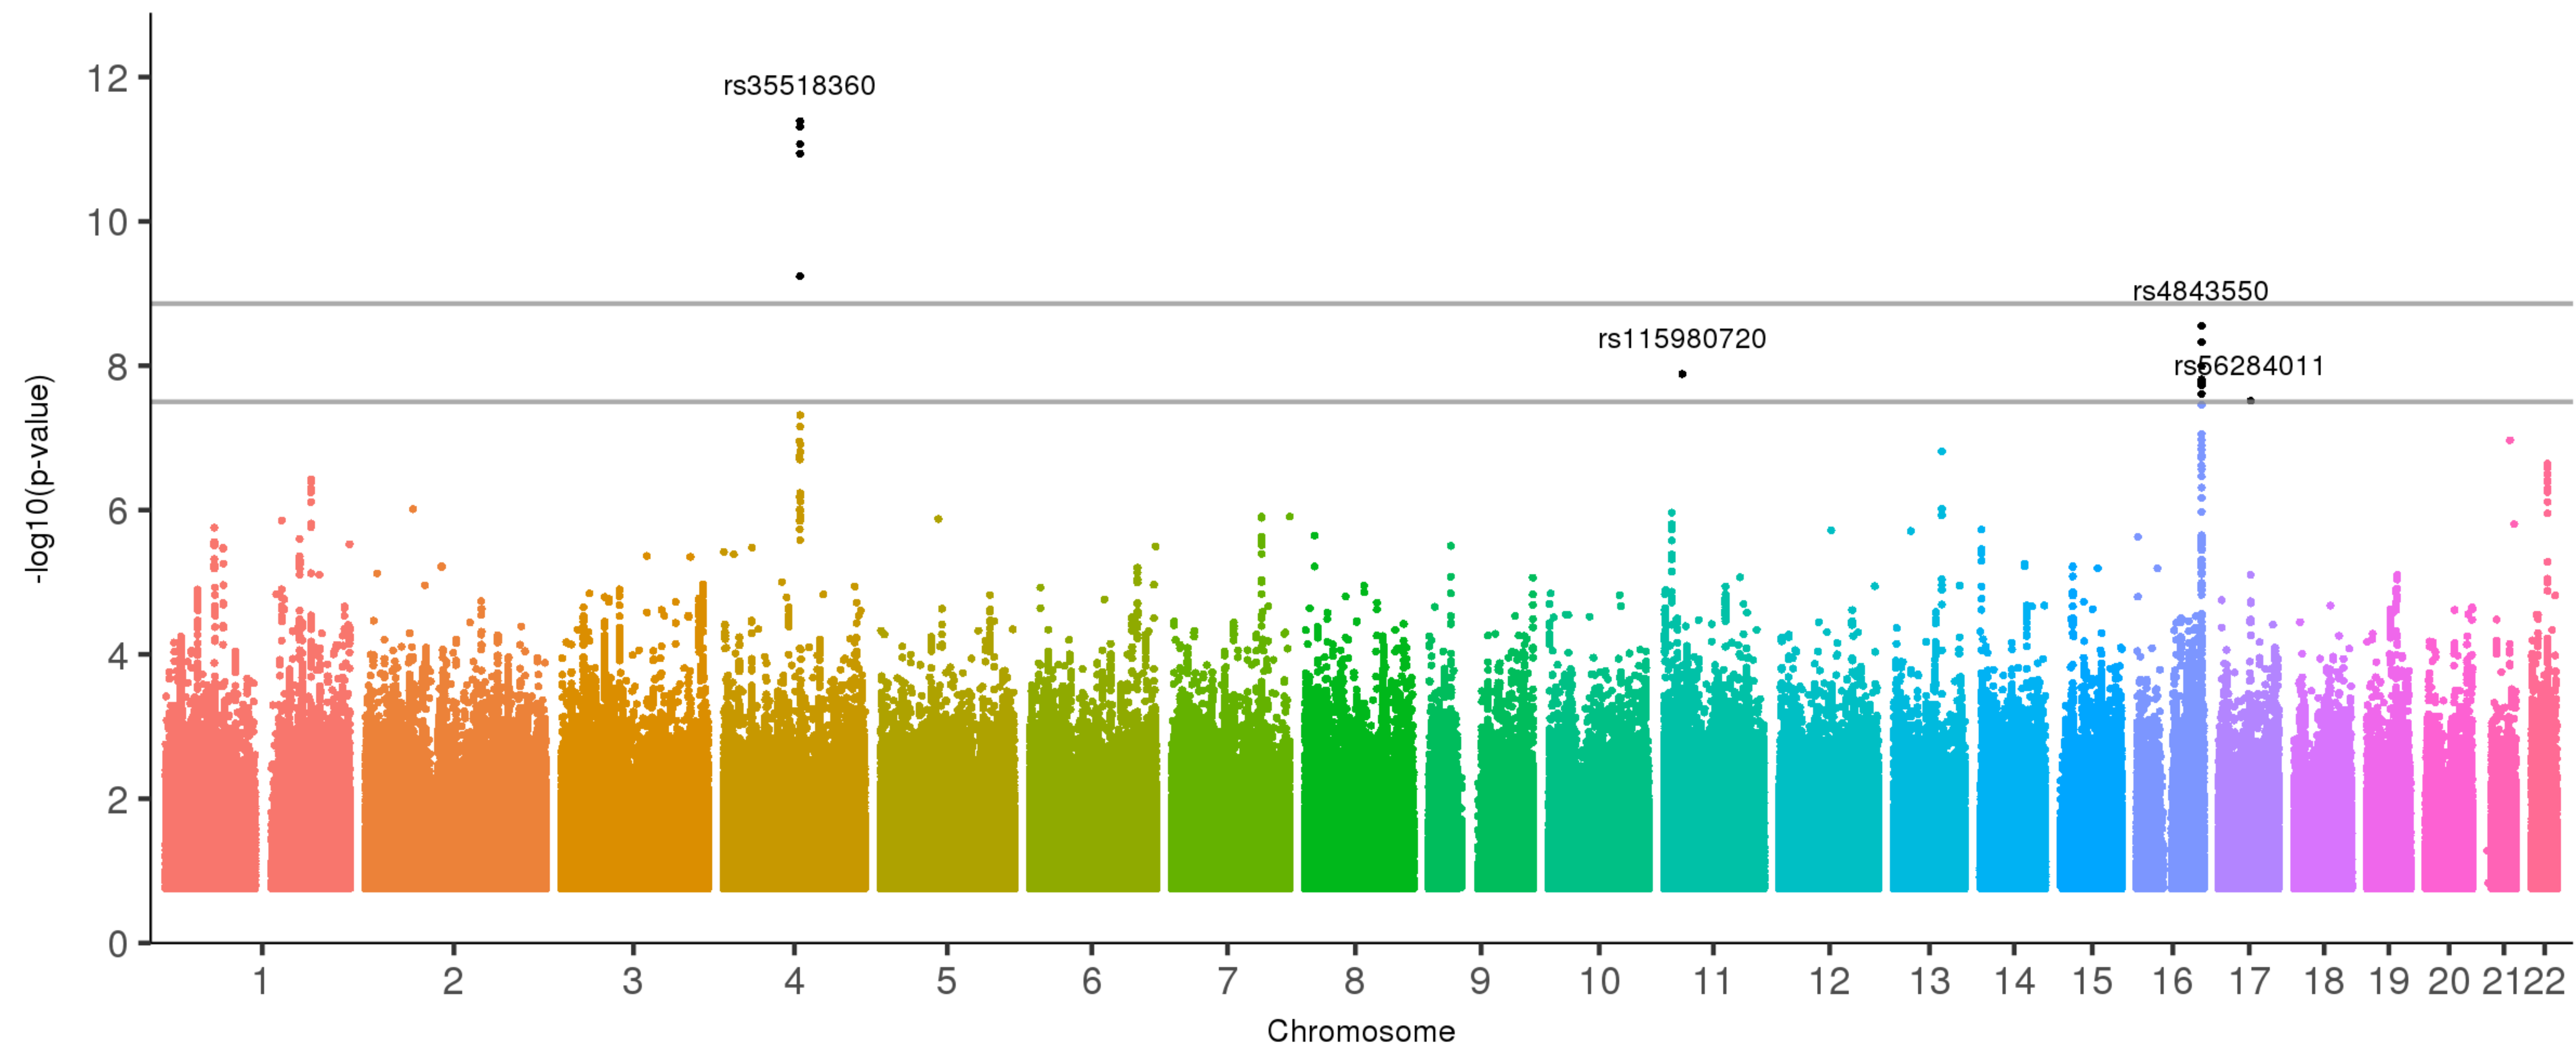

T1 brain vol all

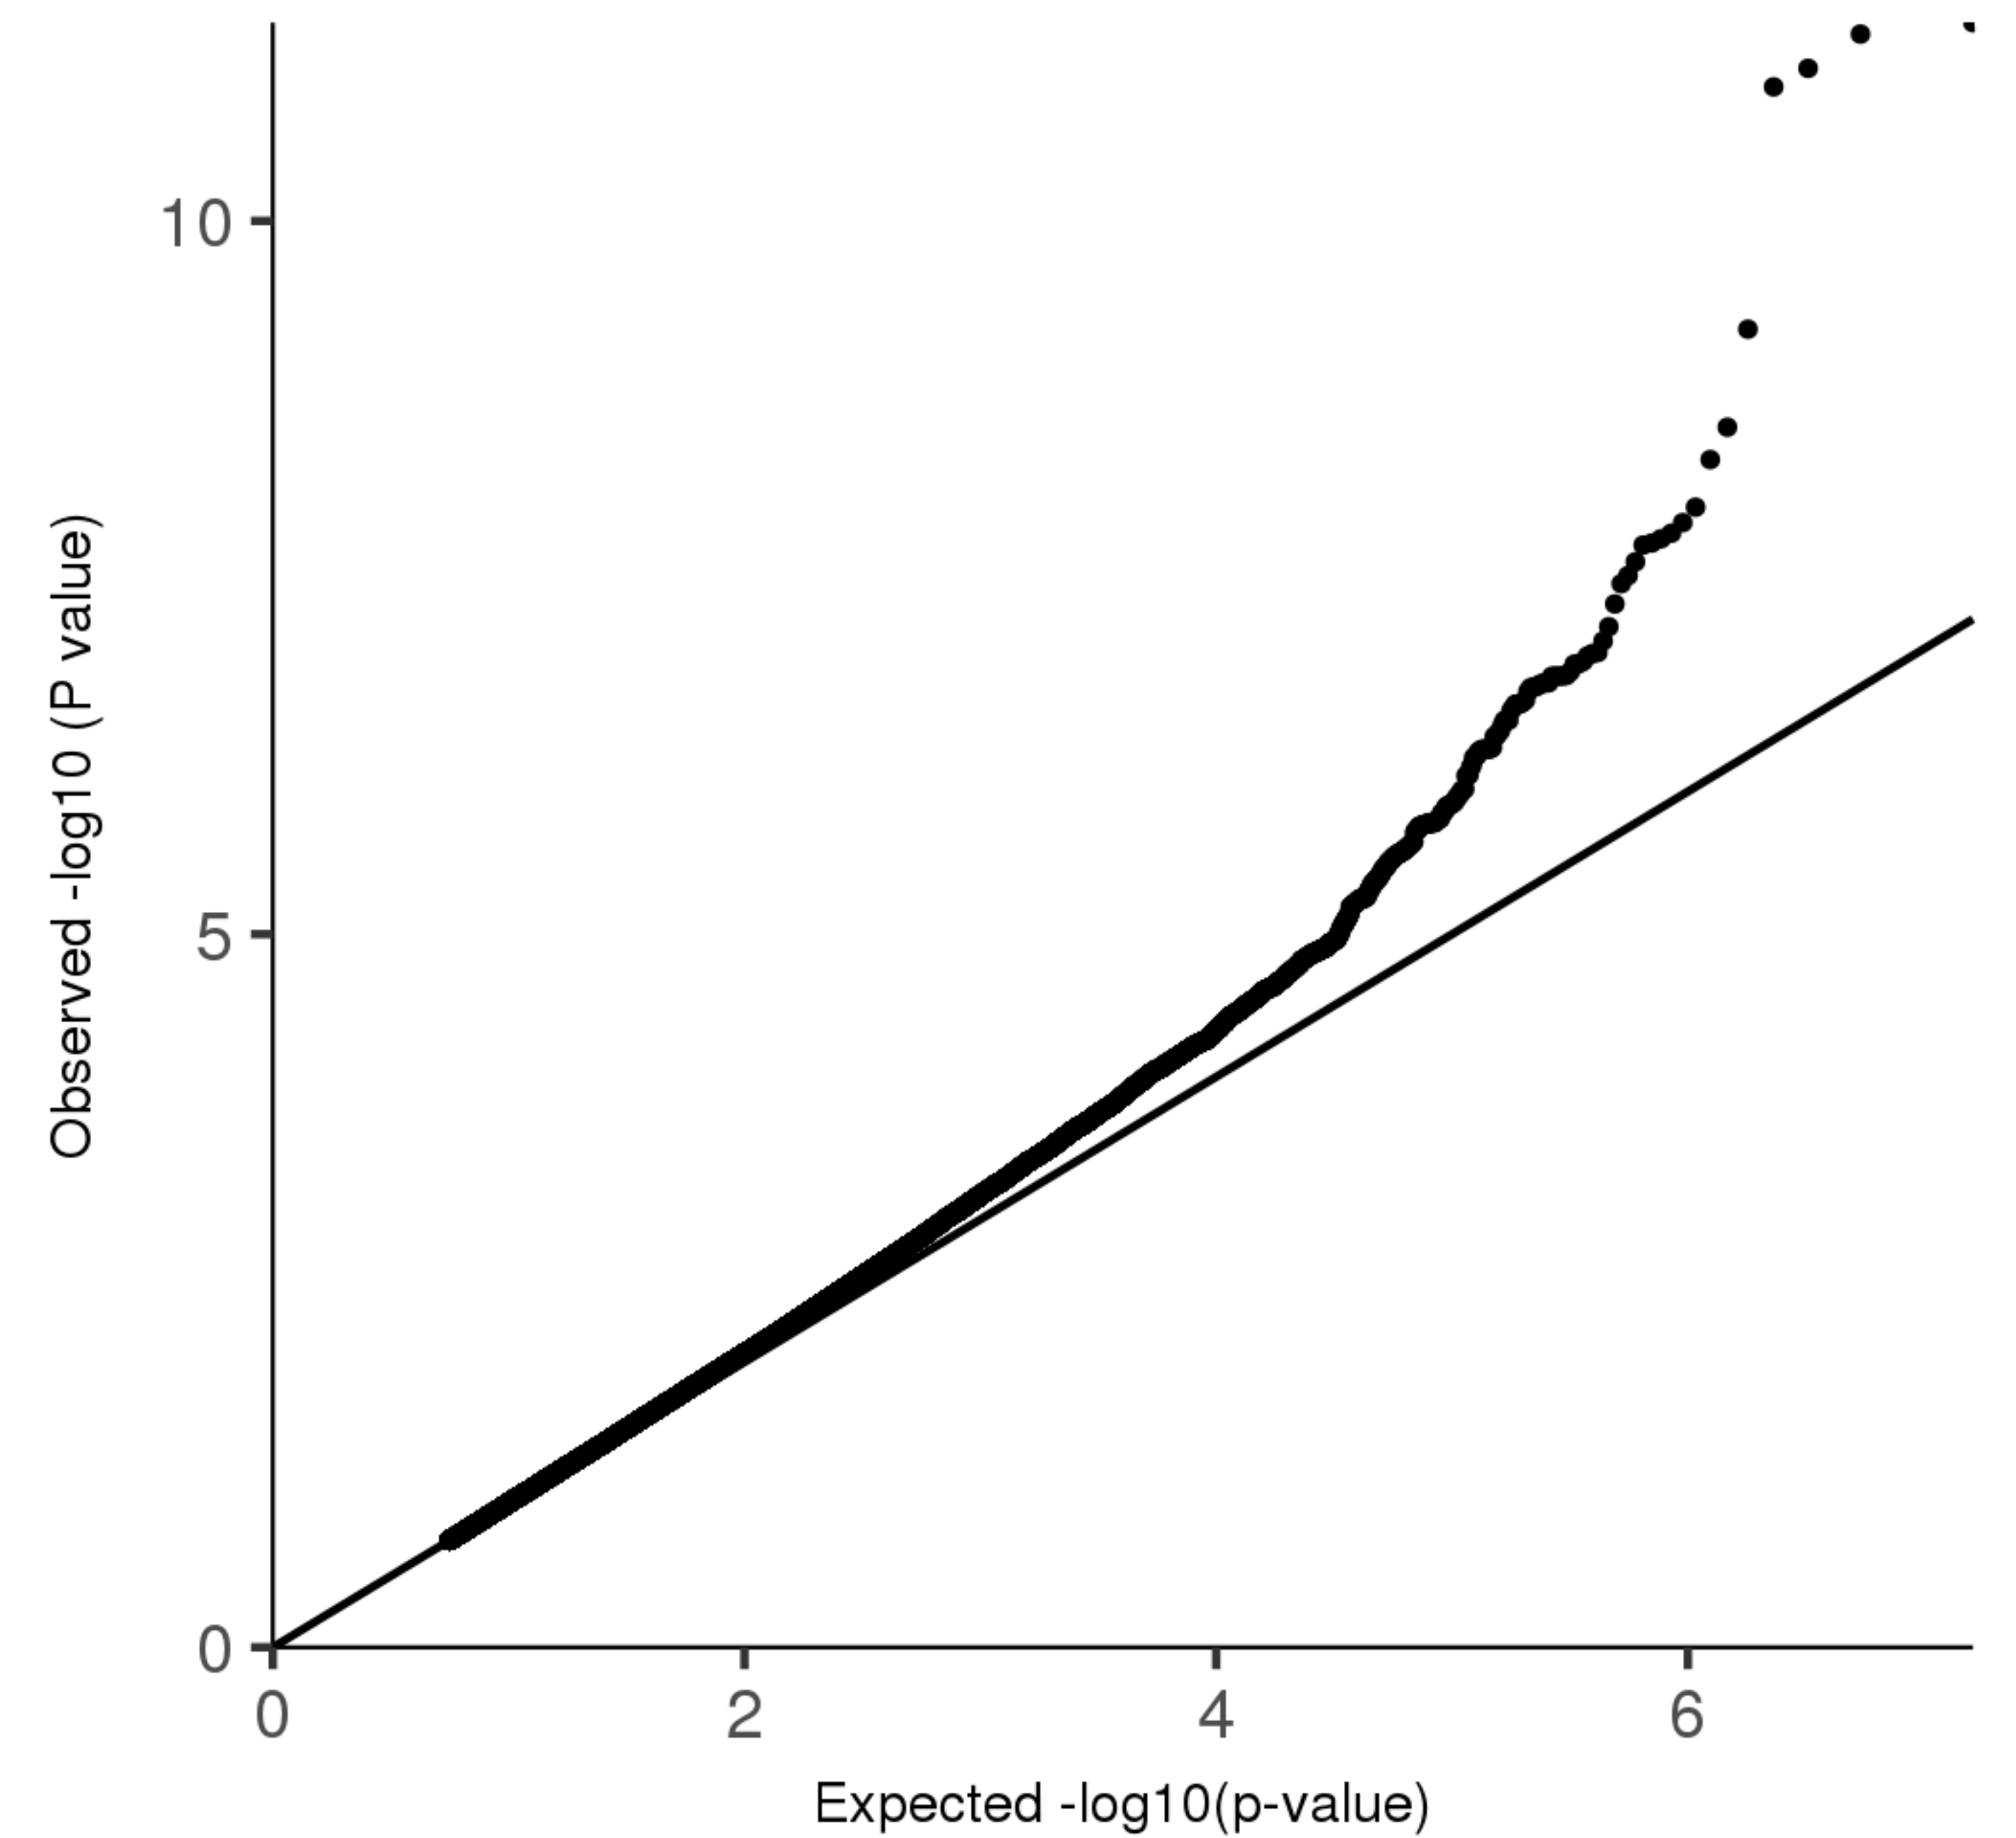

T2 star L plus R

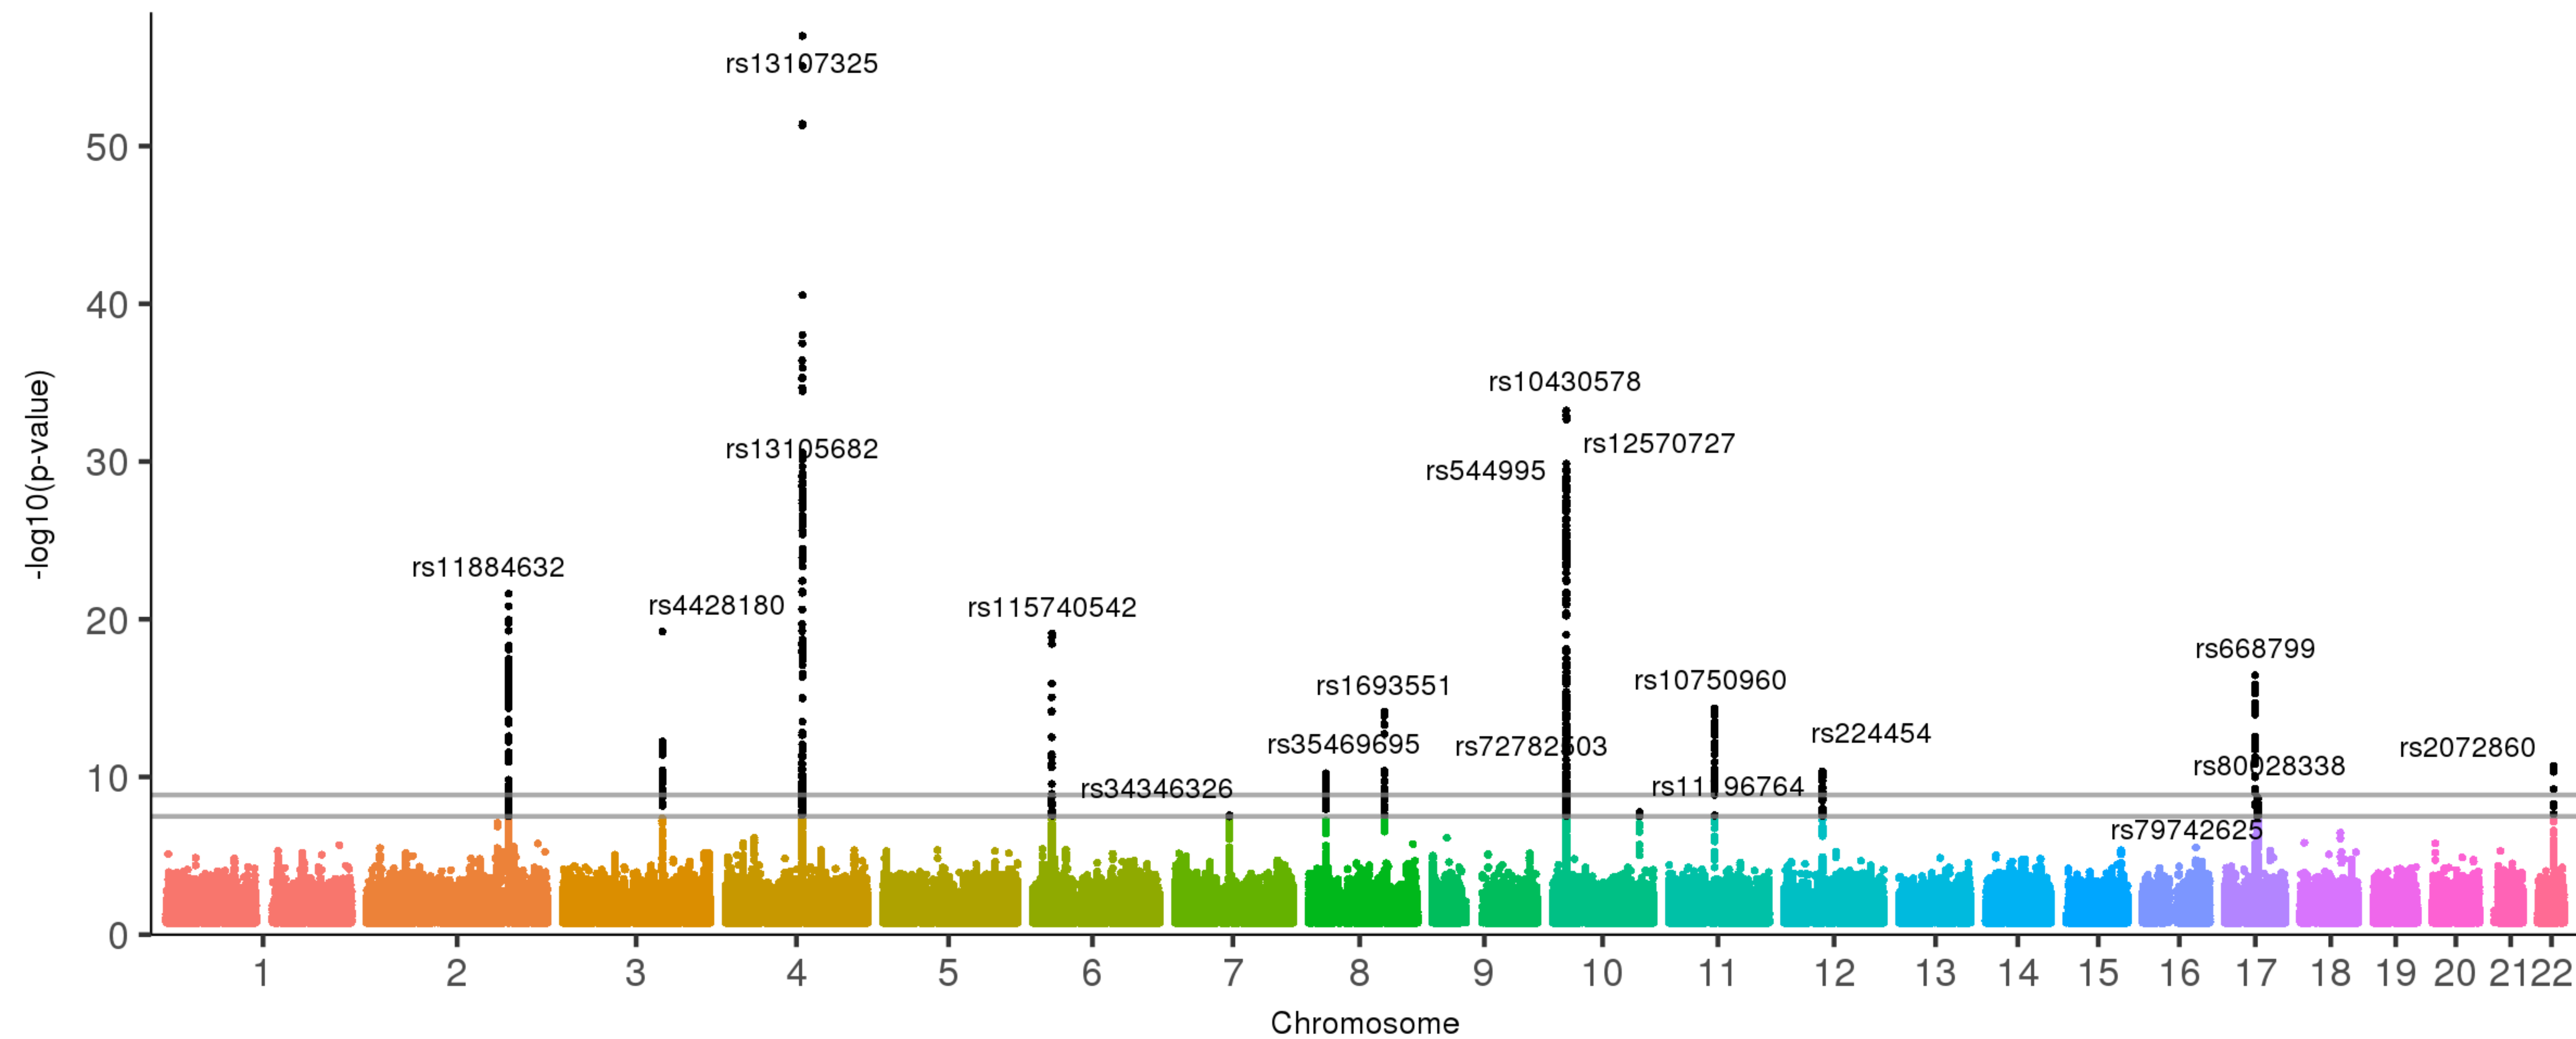

T2 star L plus R

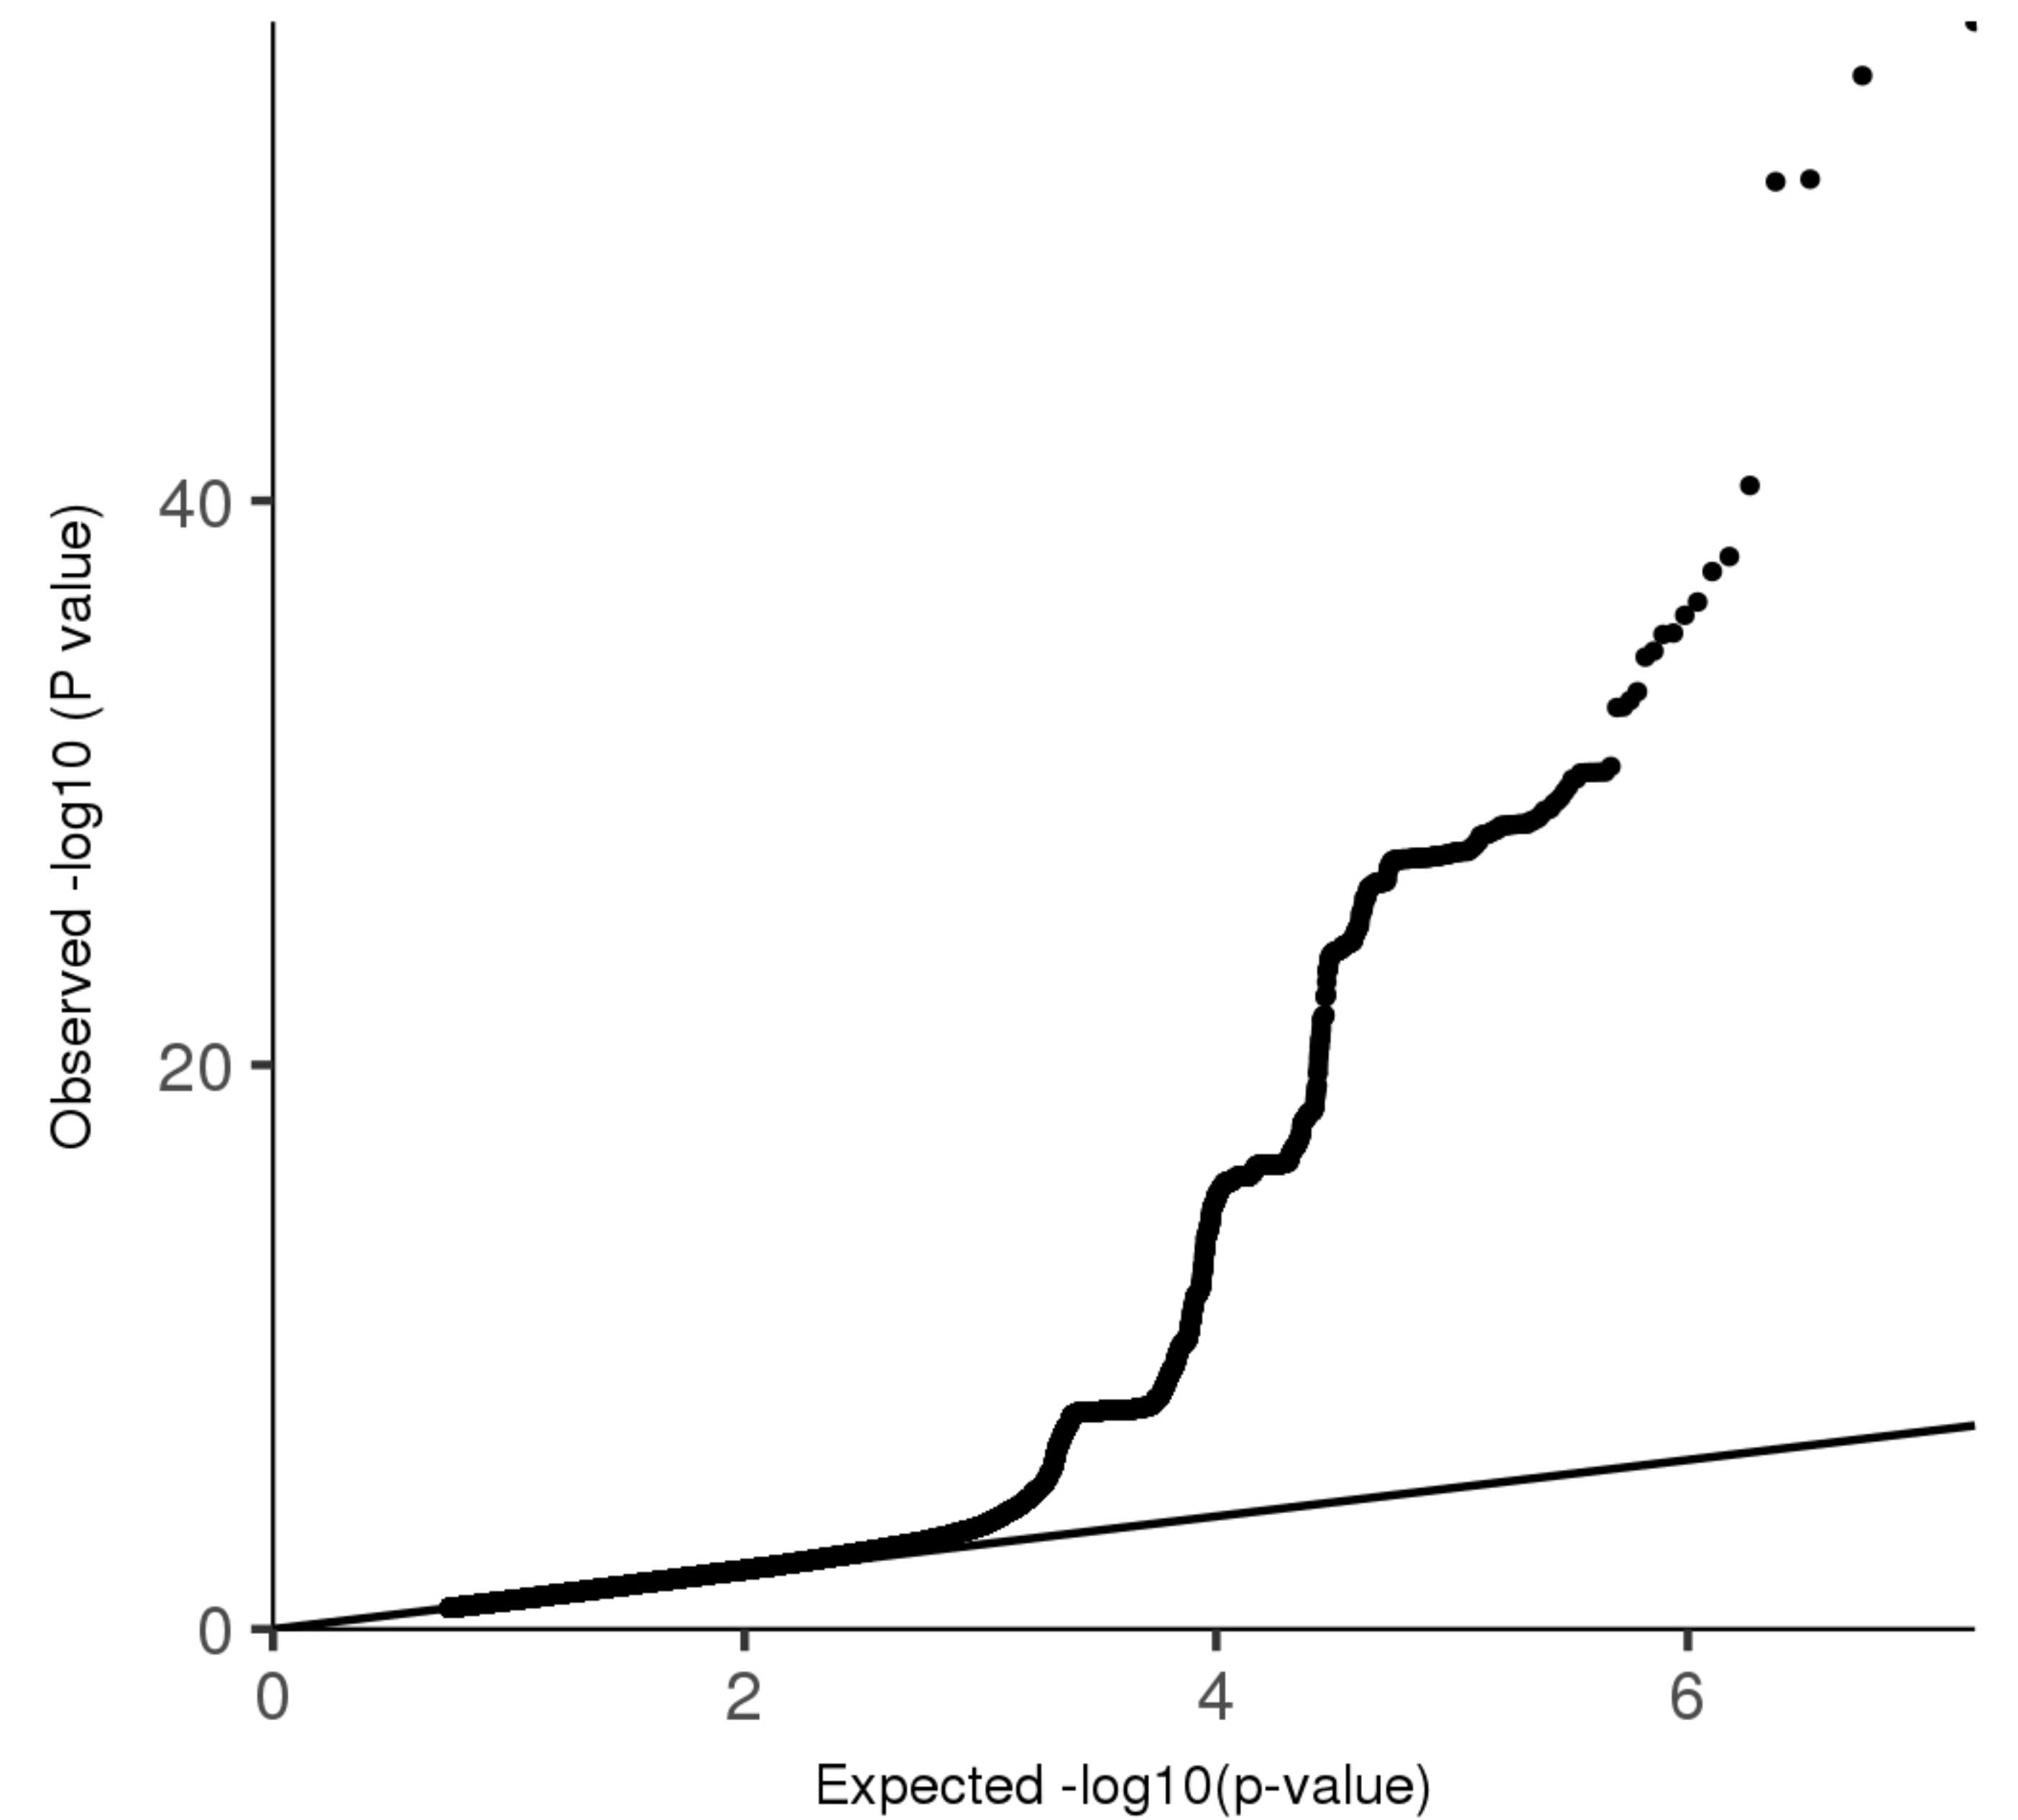

T1 Subcortical L plus R

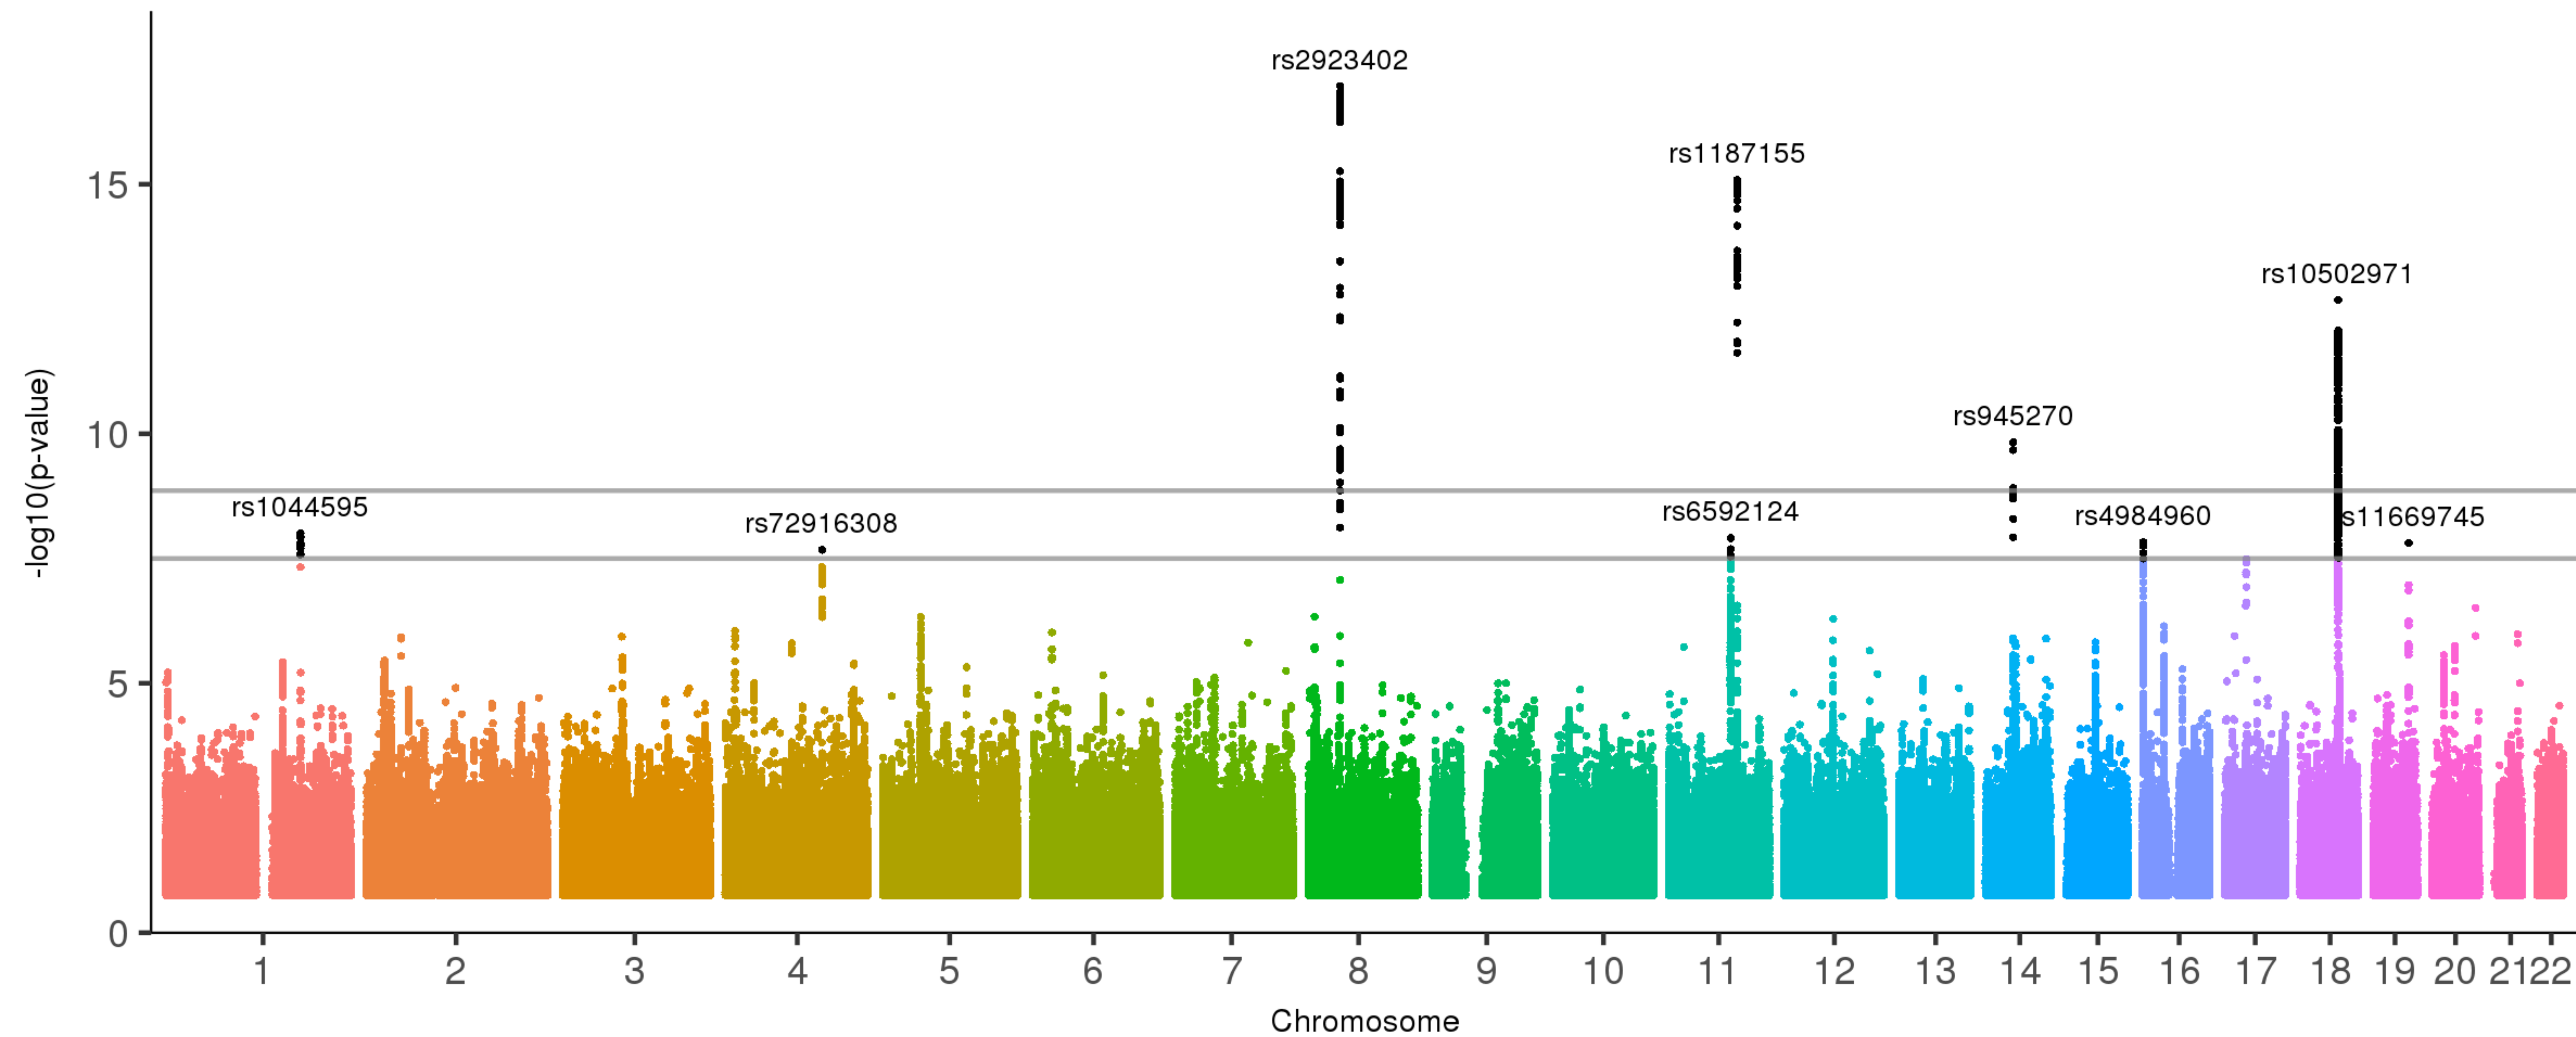

T1 Subcortical L plus R

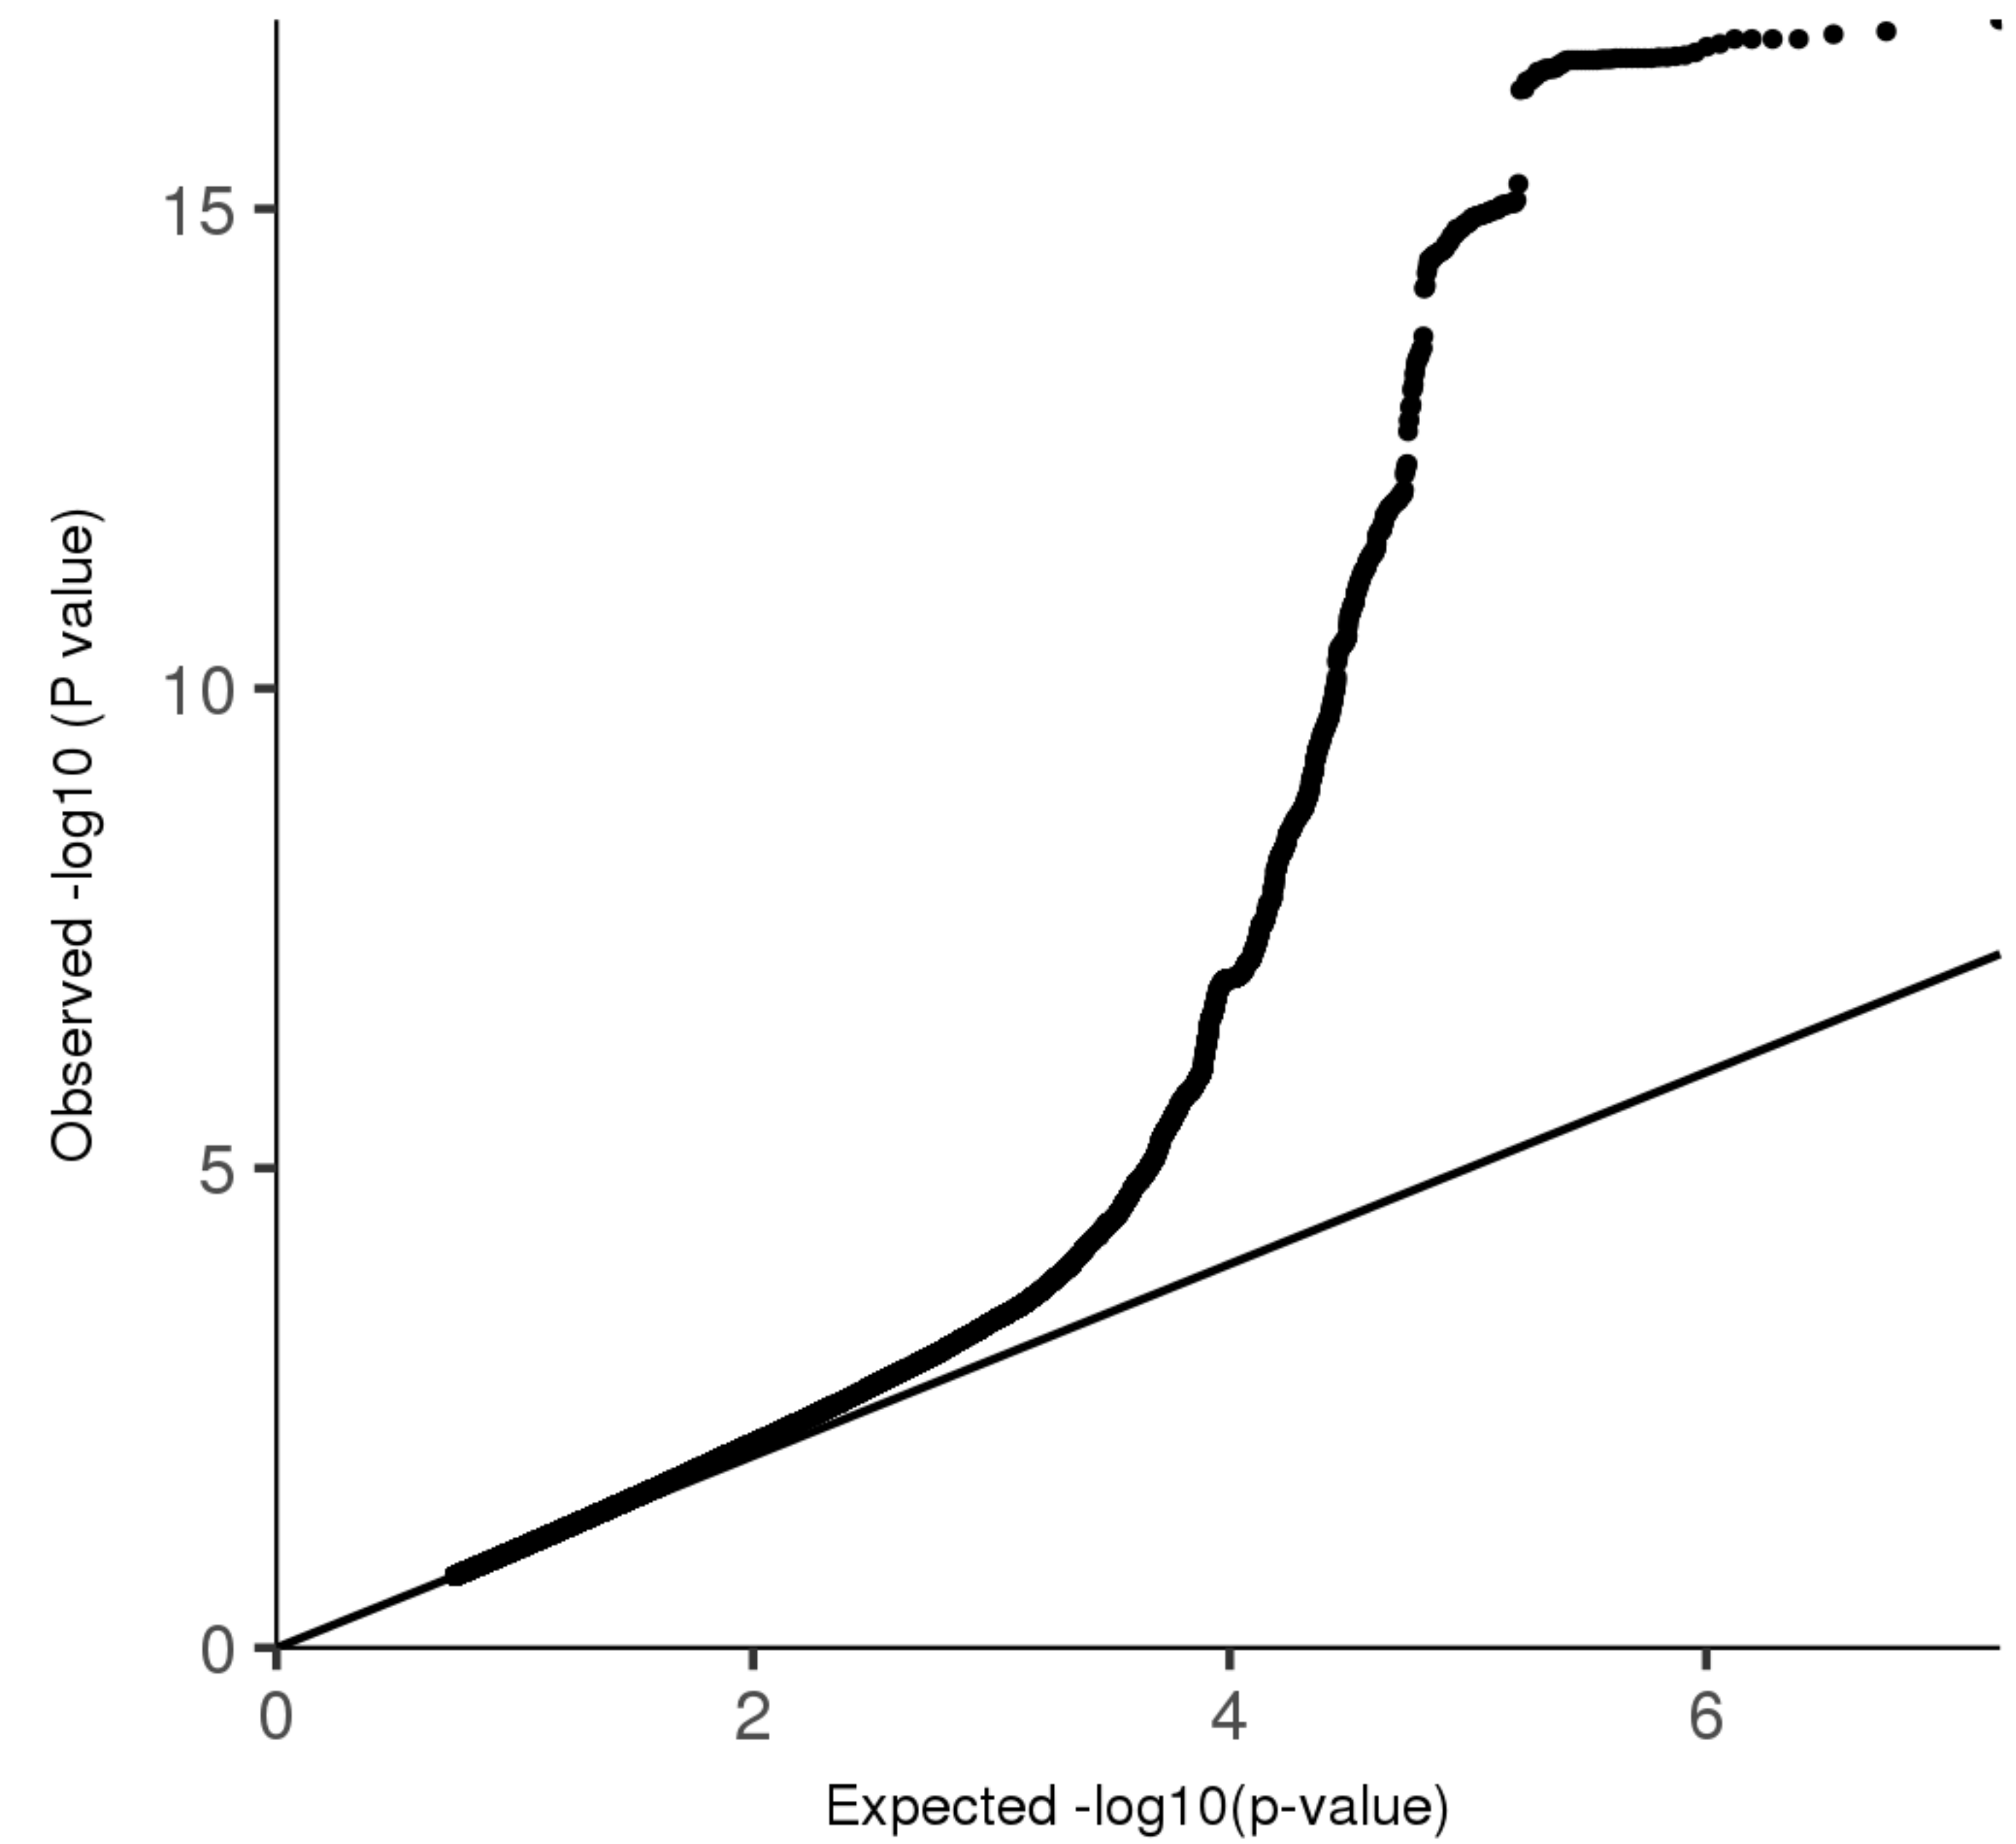

rfMRI ICA Features

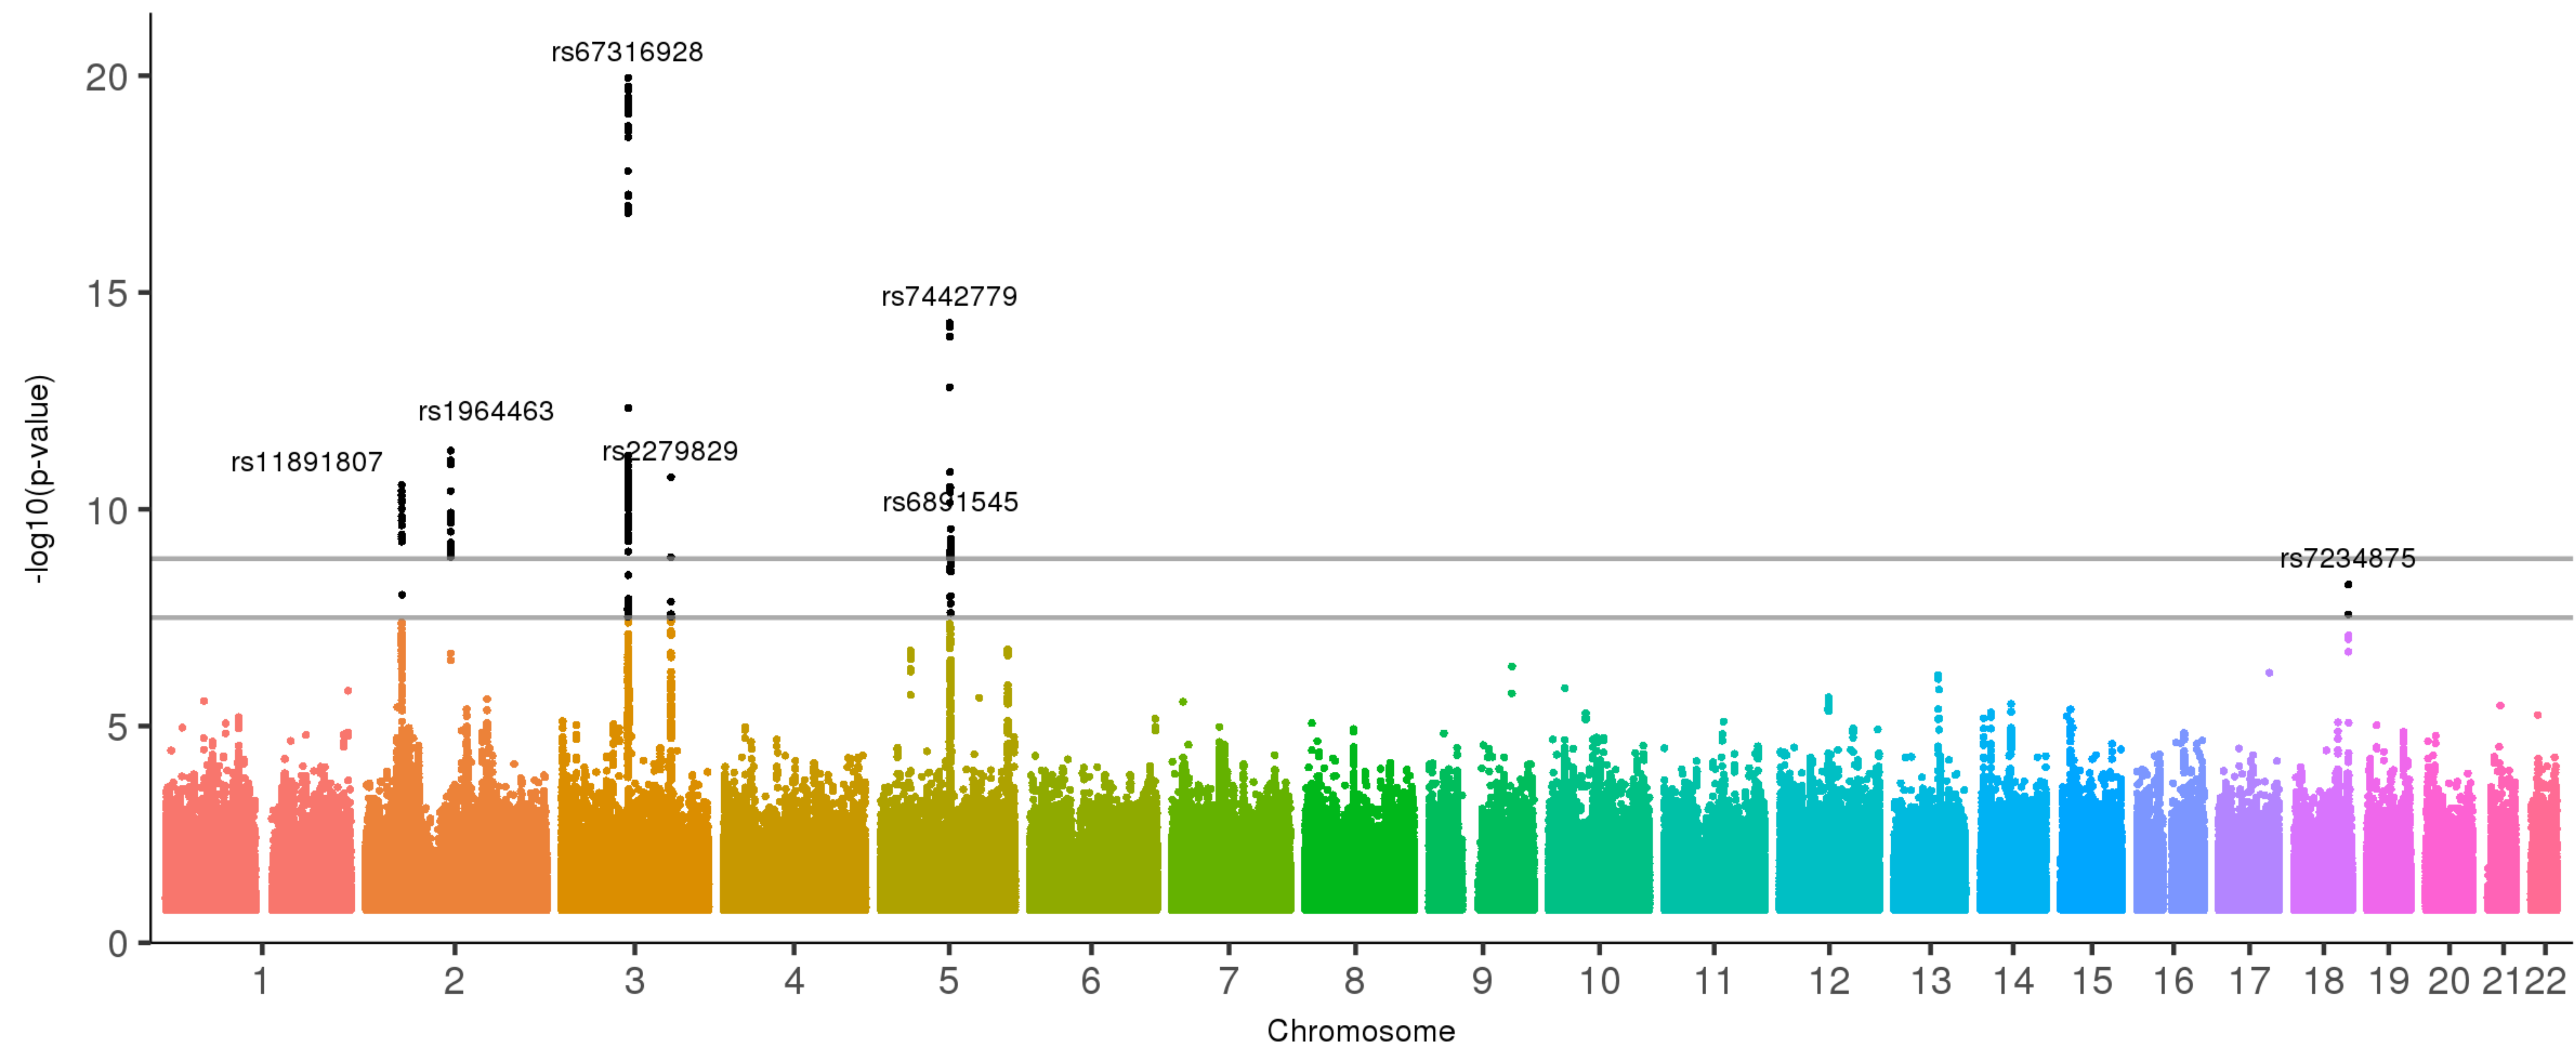

rfMRI ICA Features

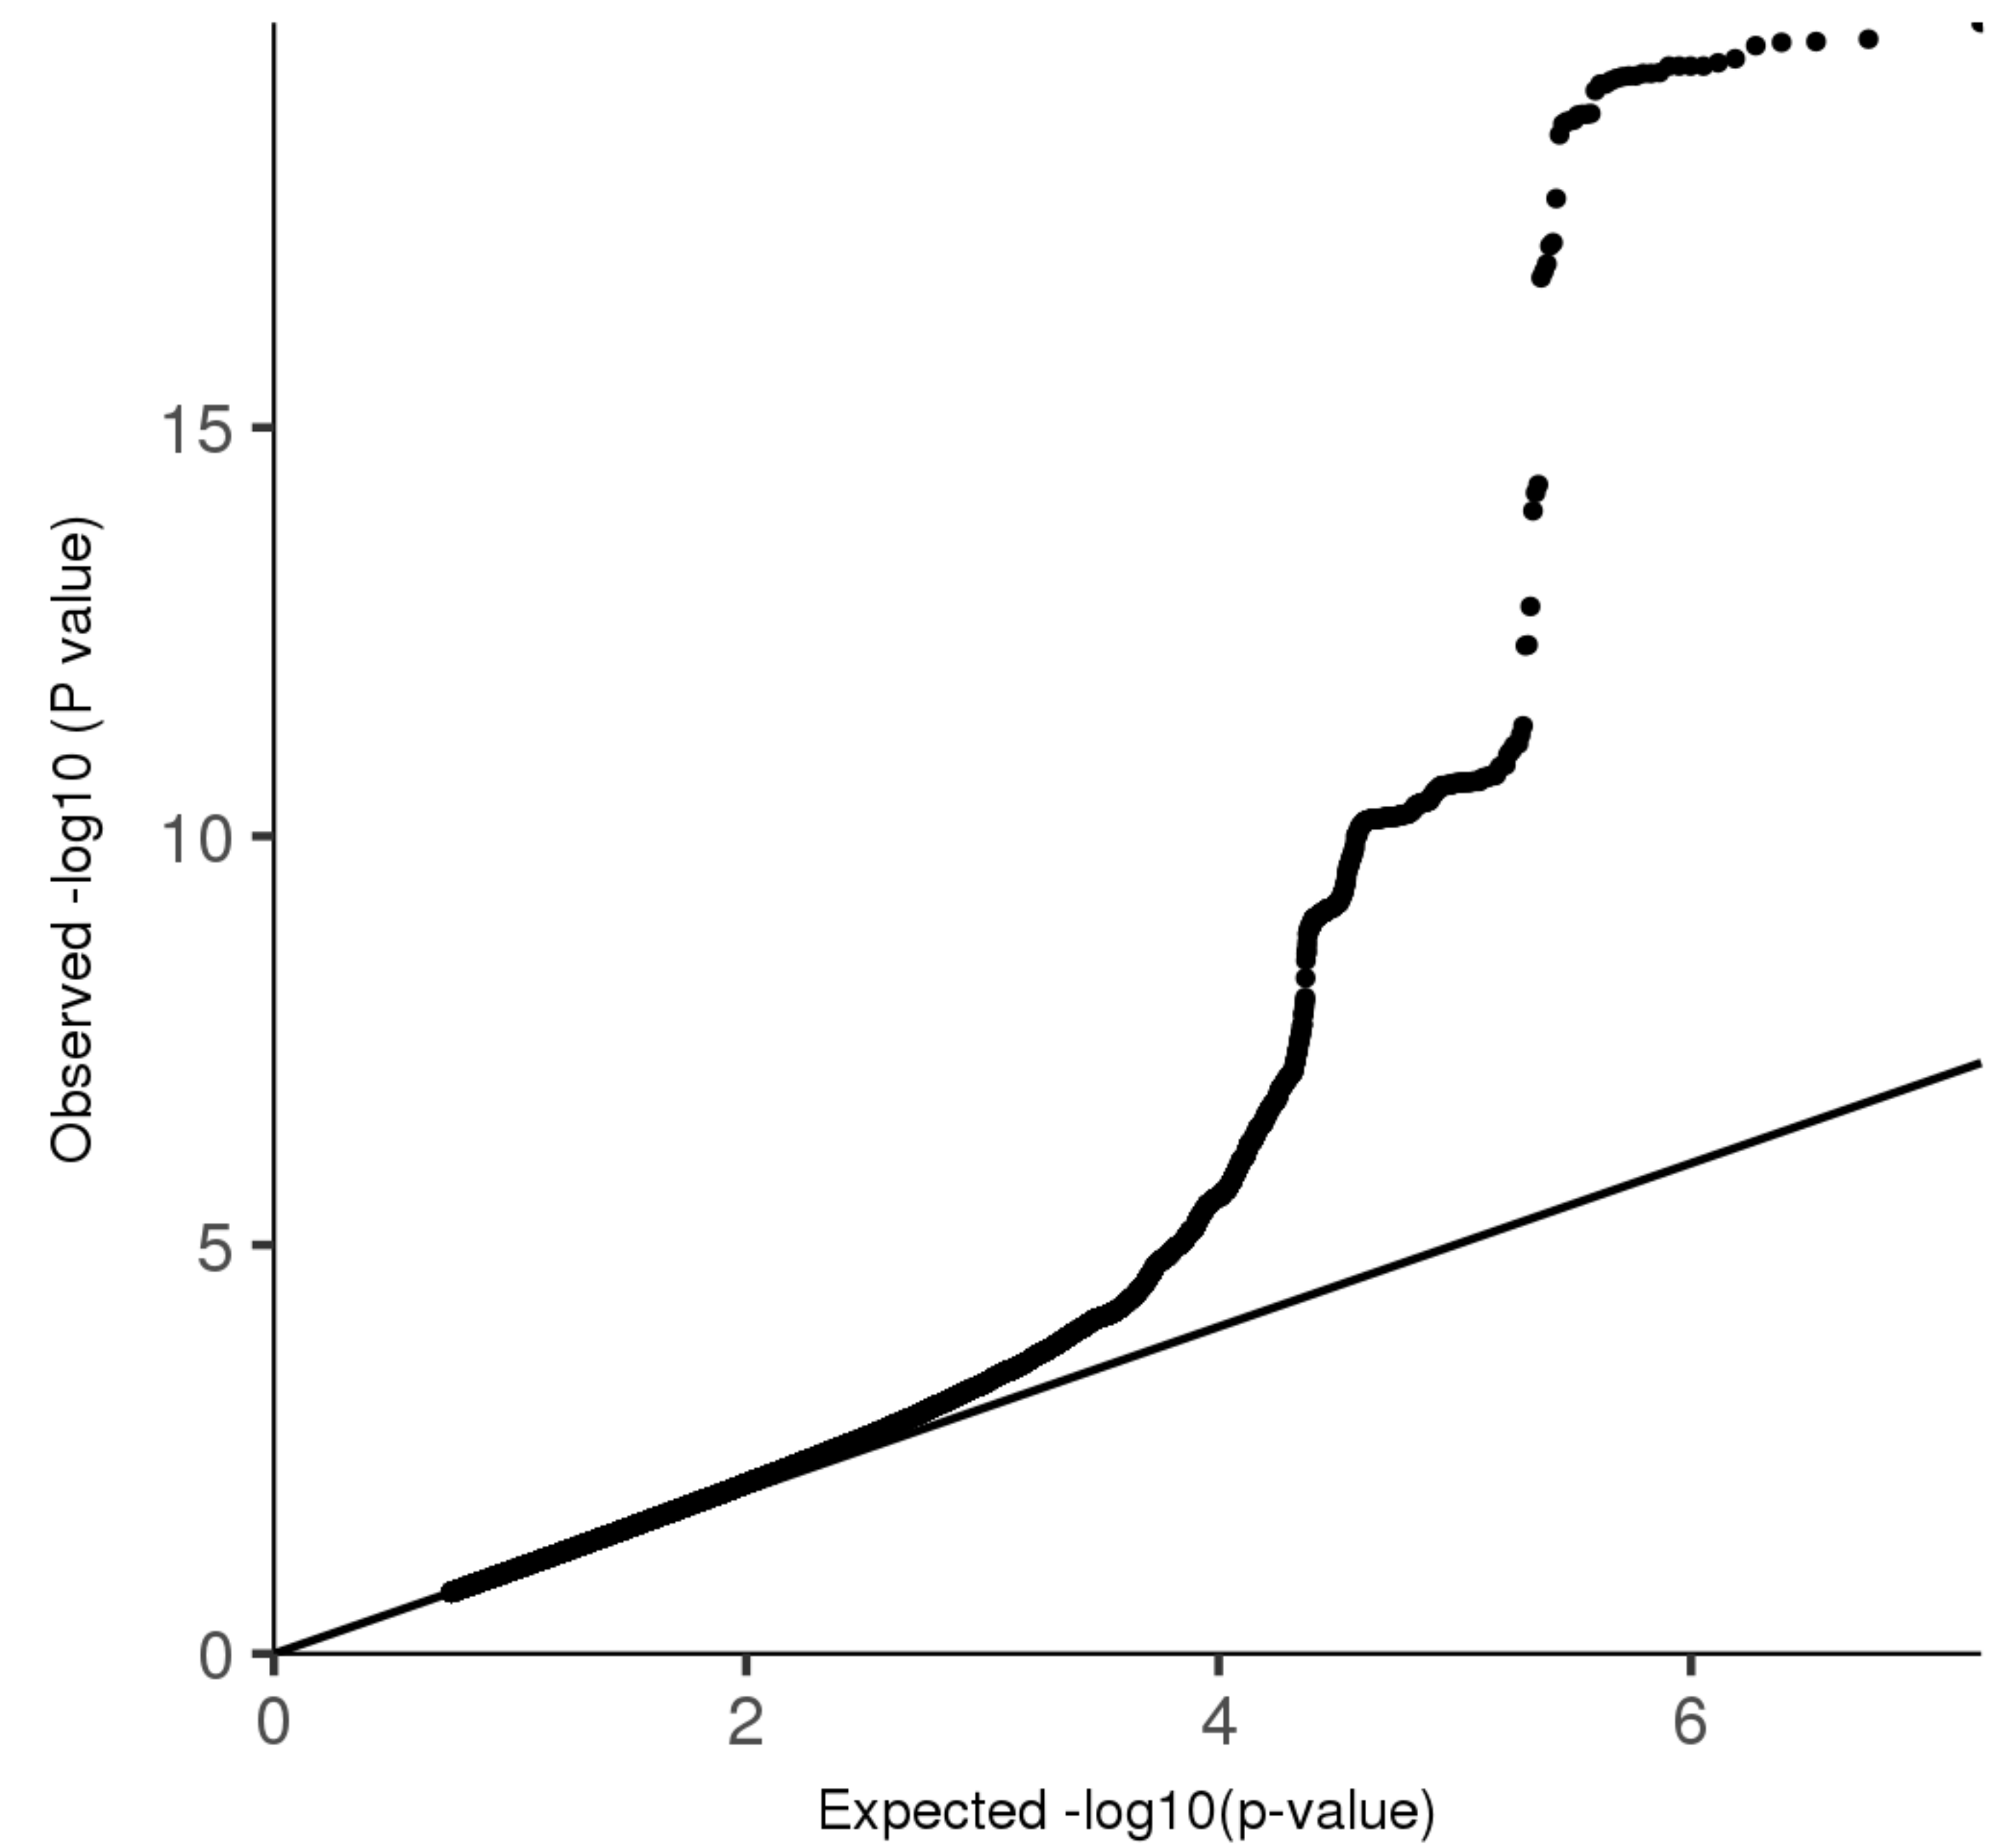

dMRI FA

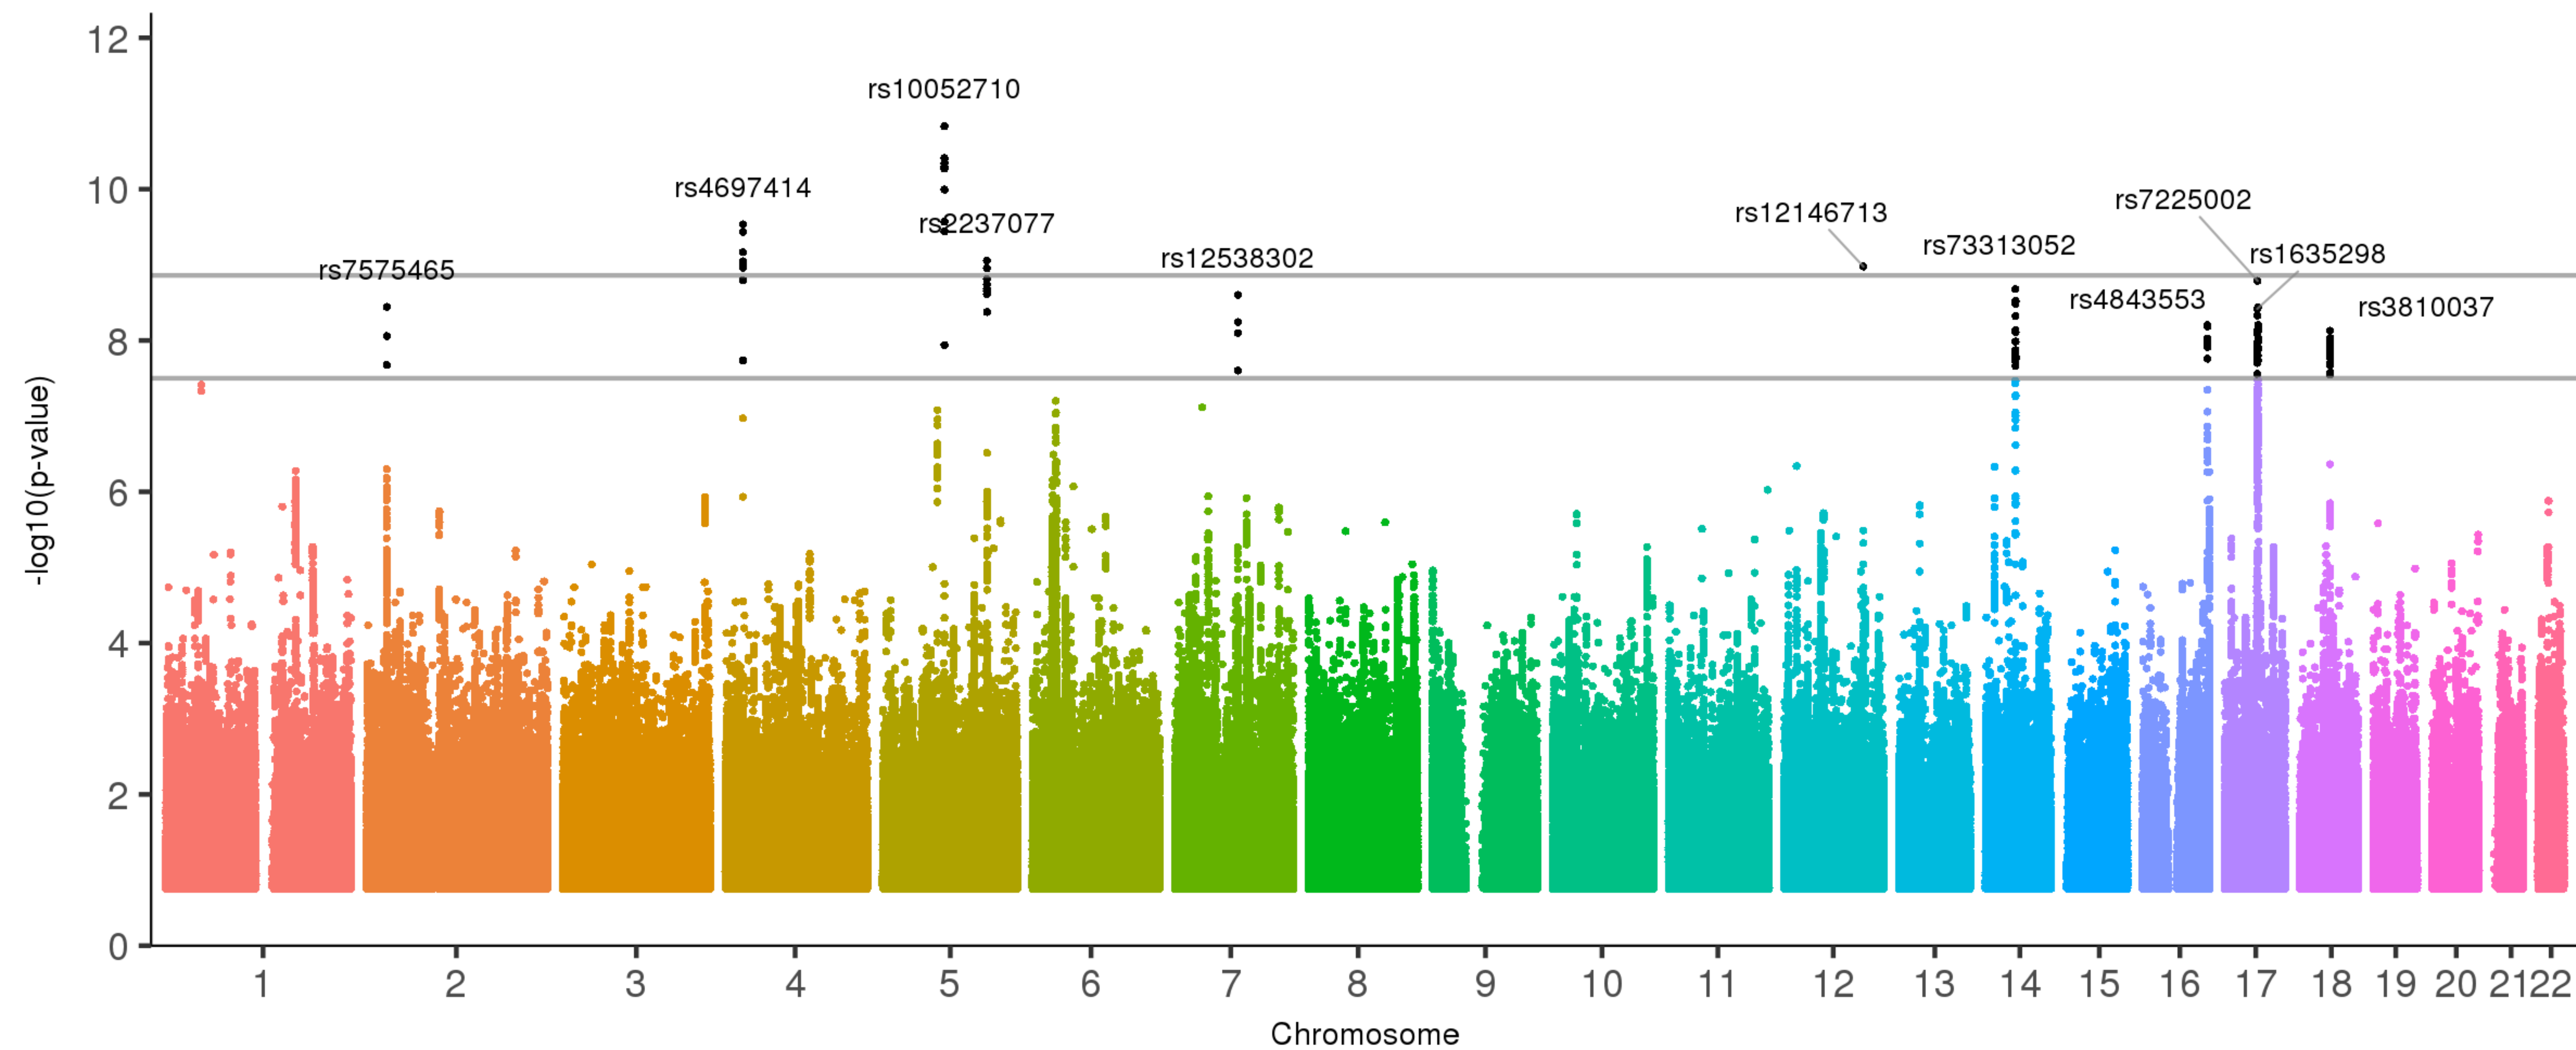

dMRI FA

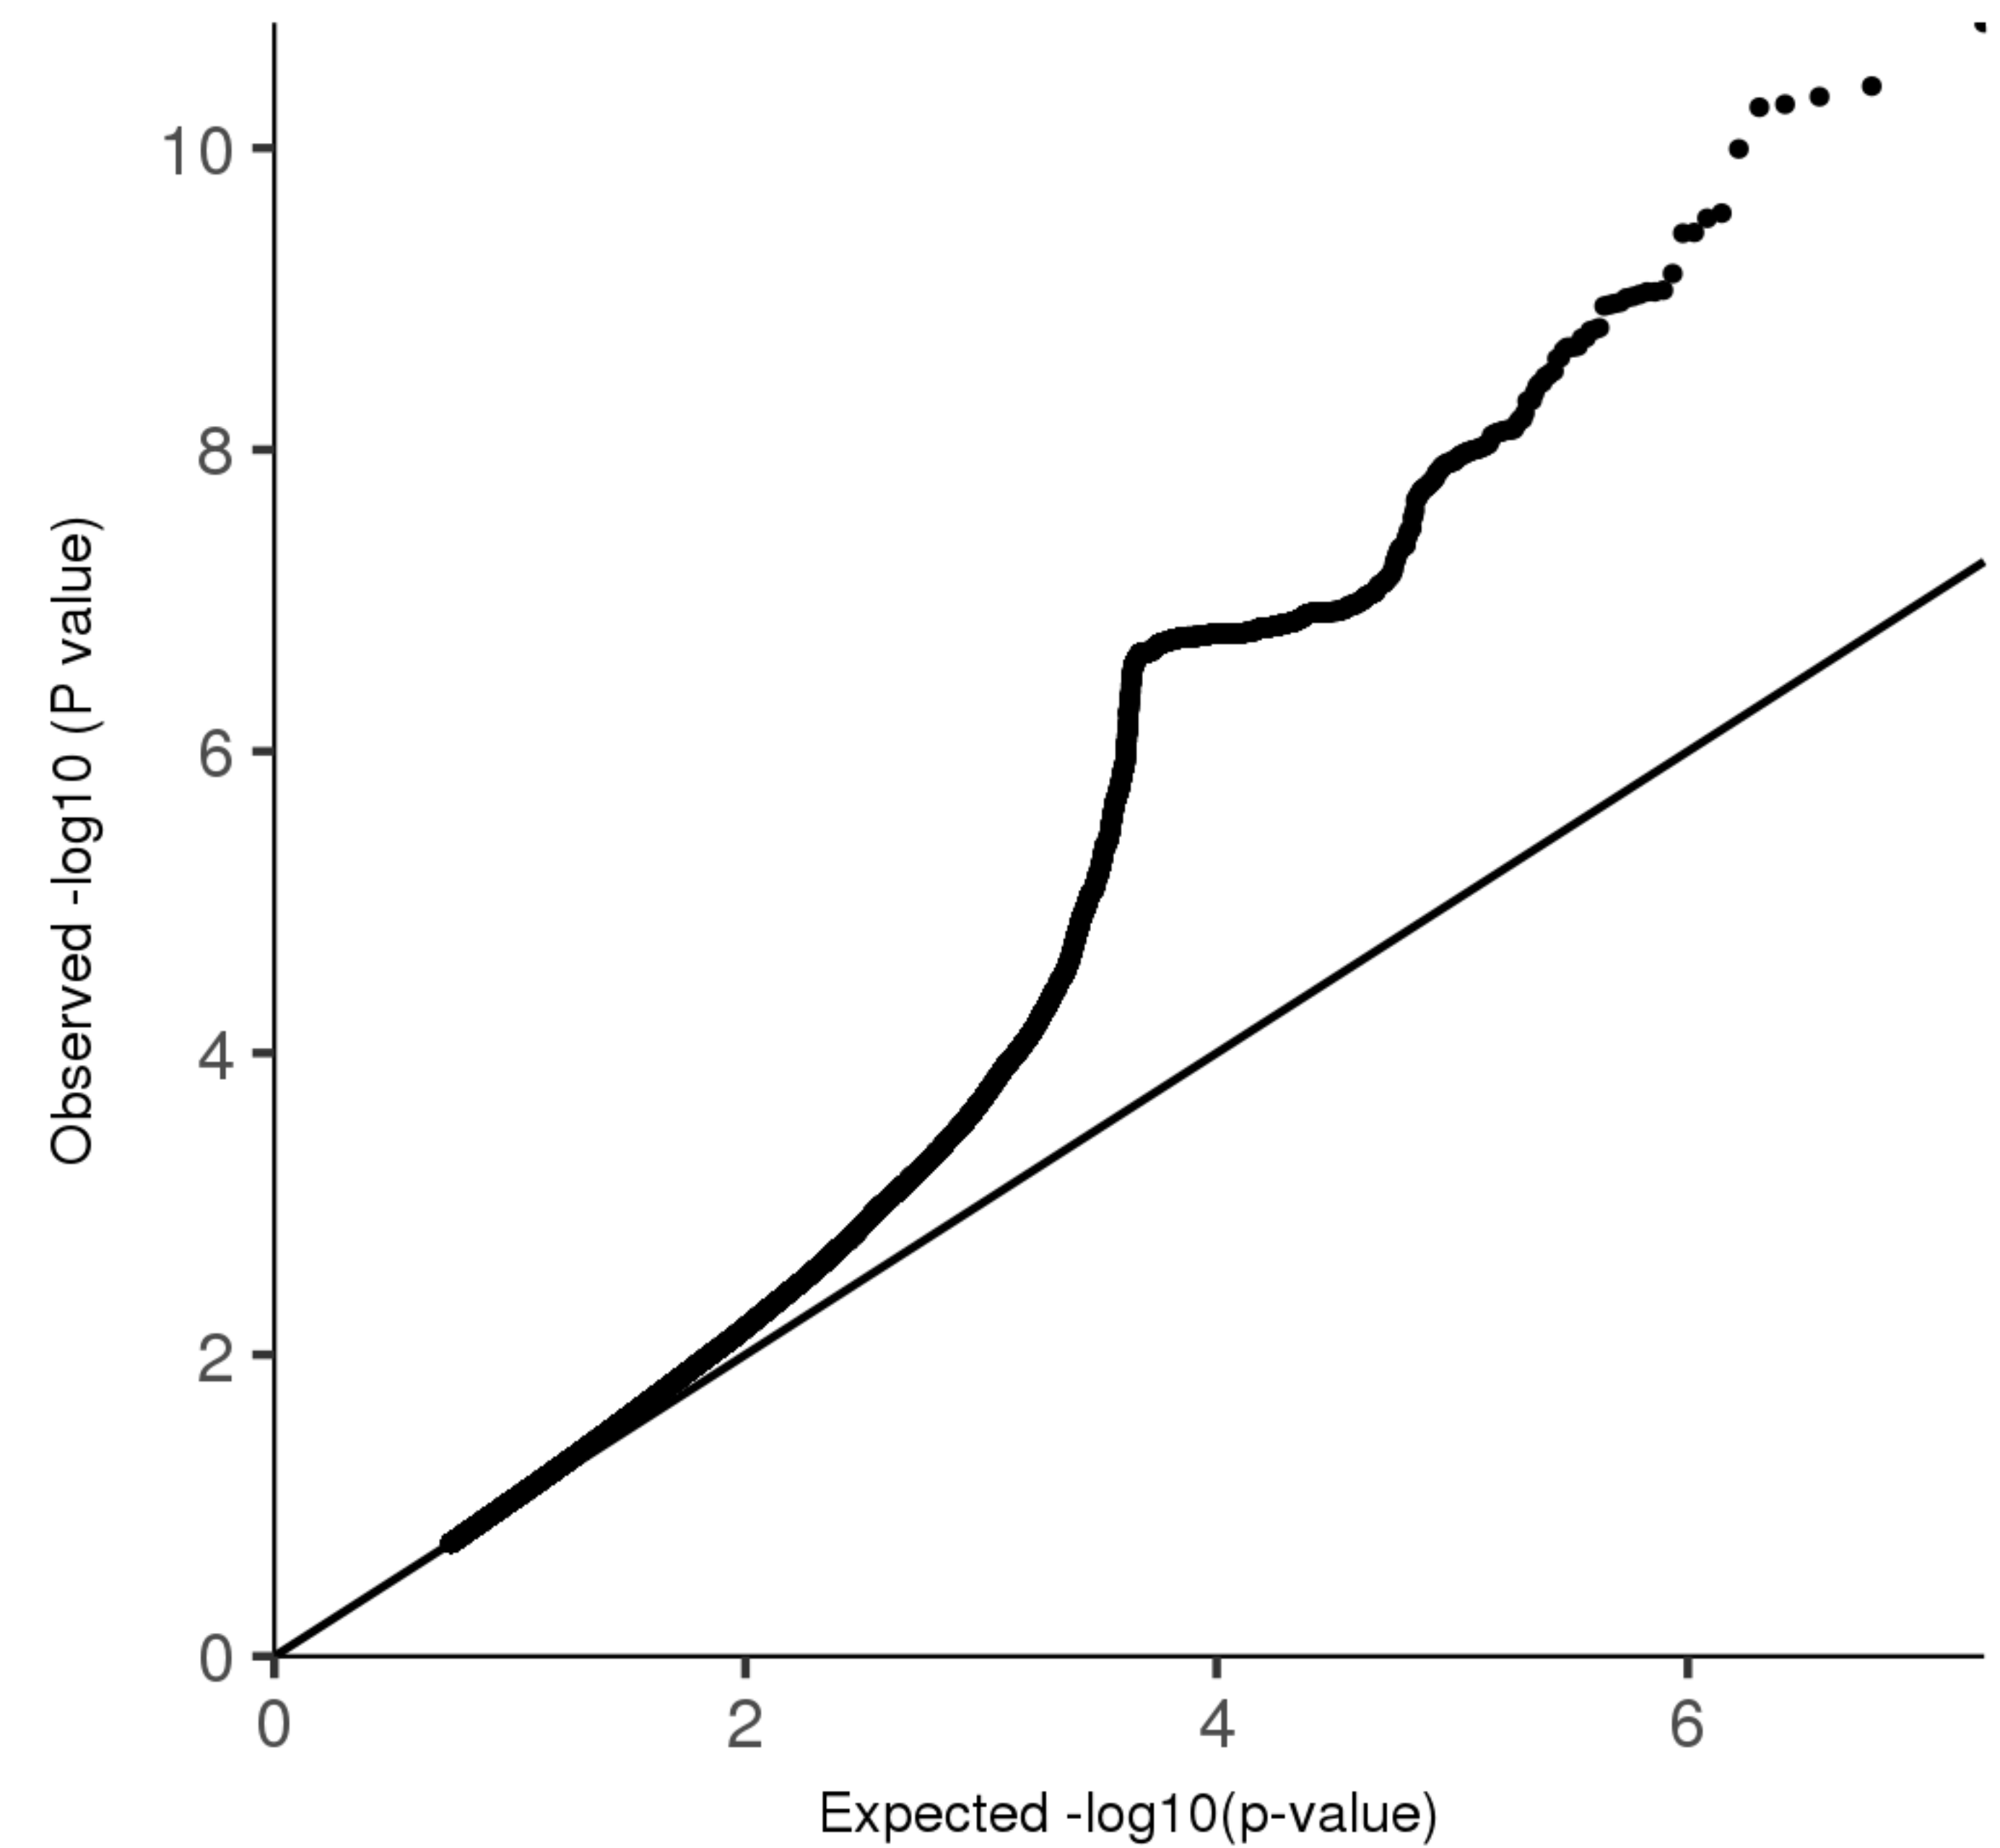

dMRI MD

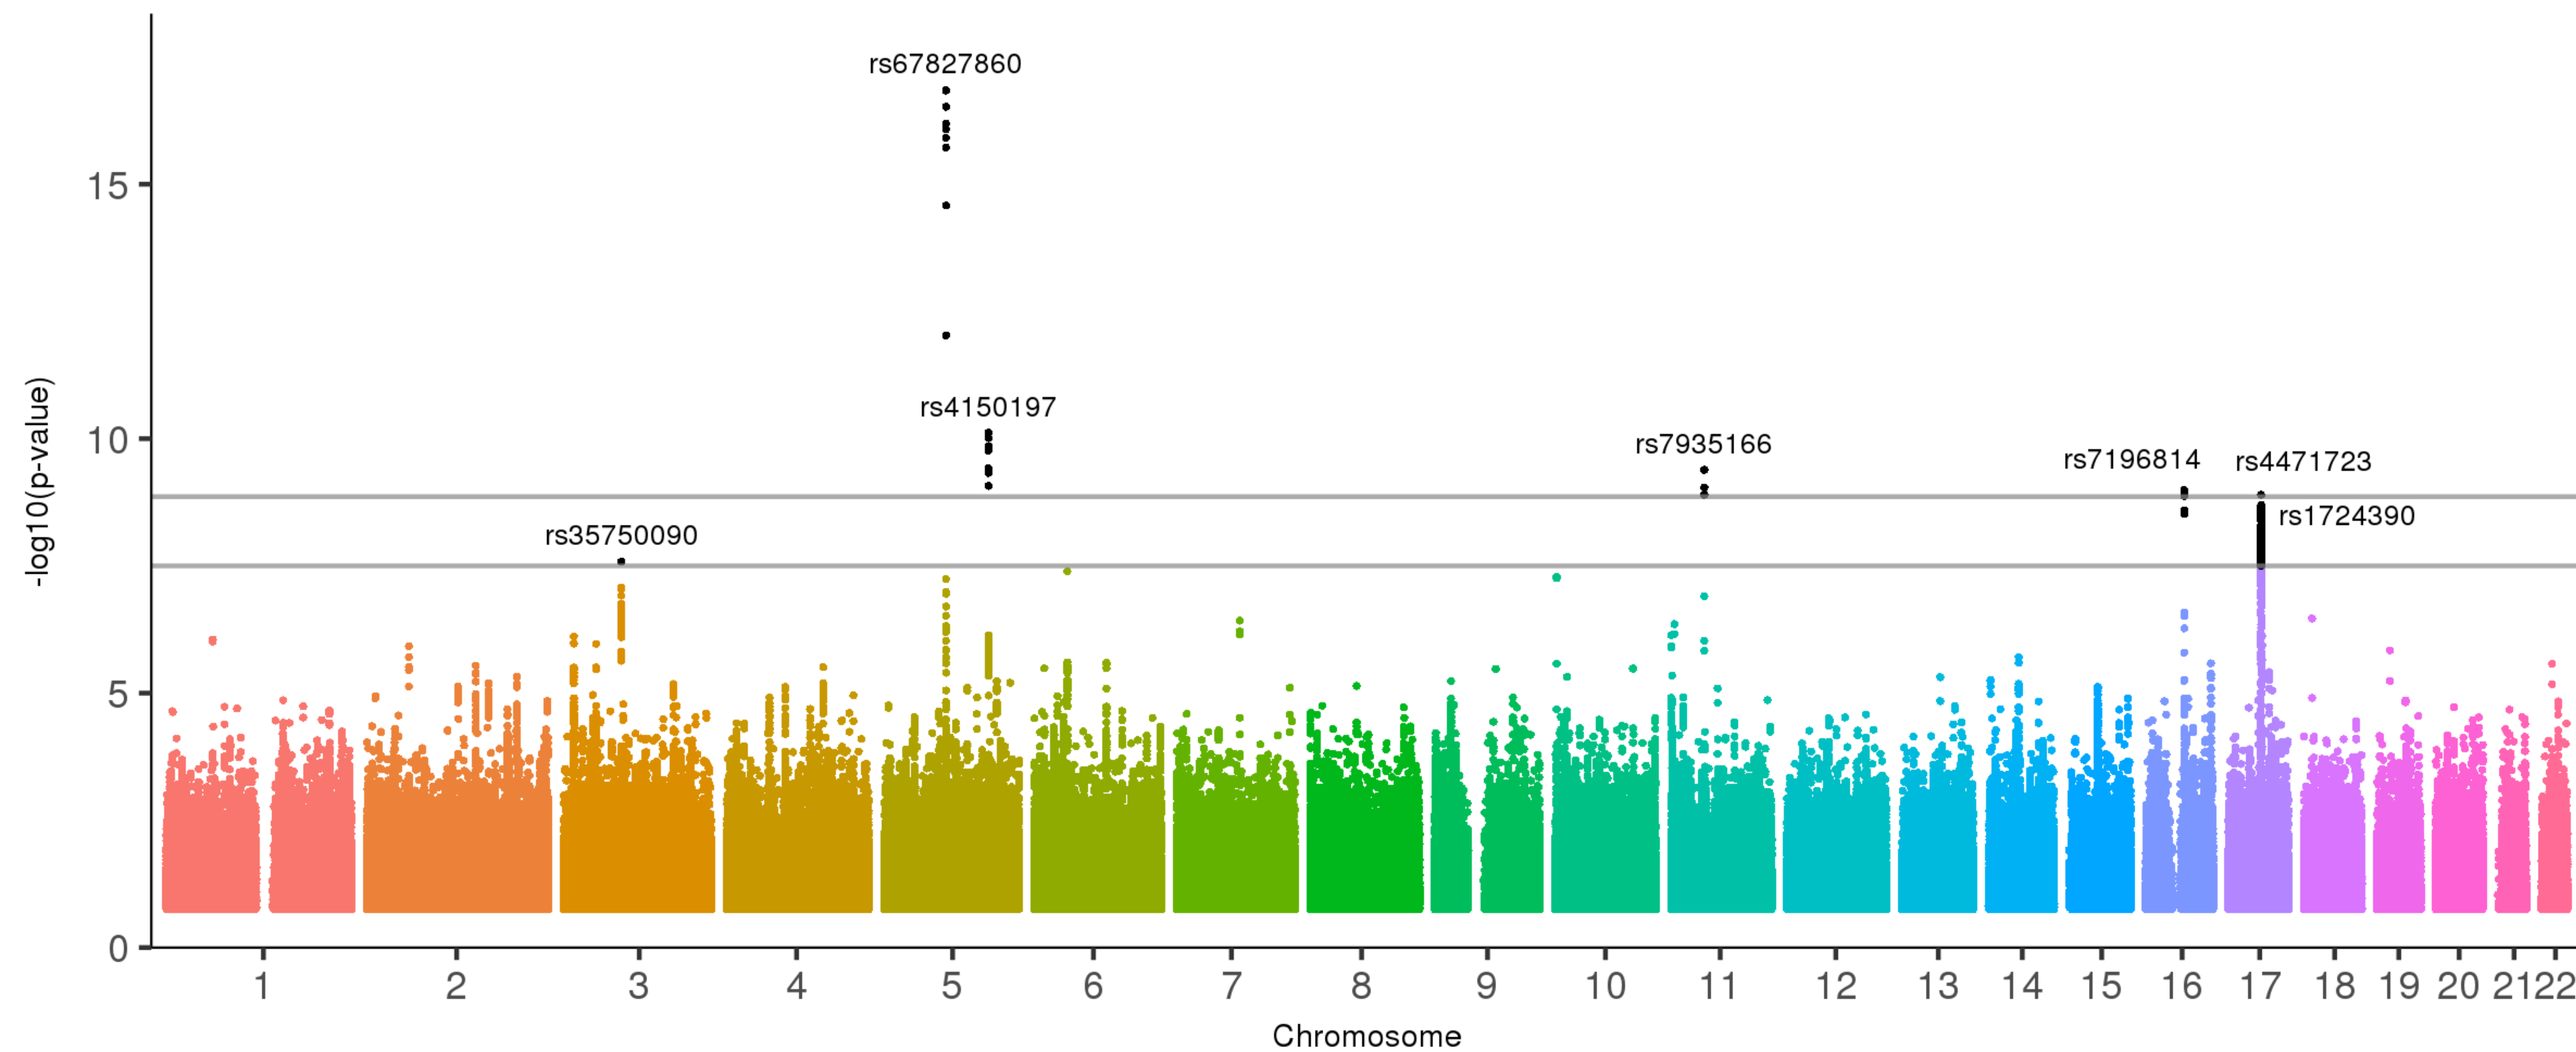

dMRI MD

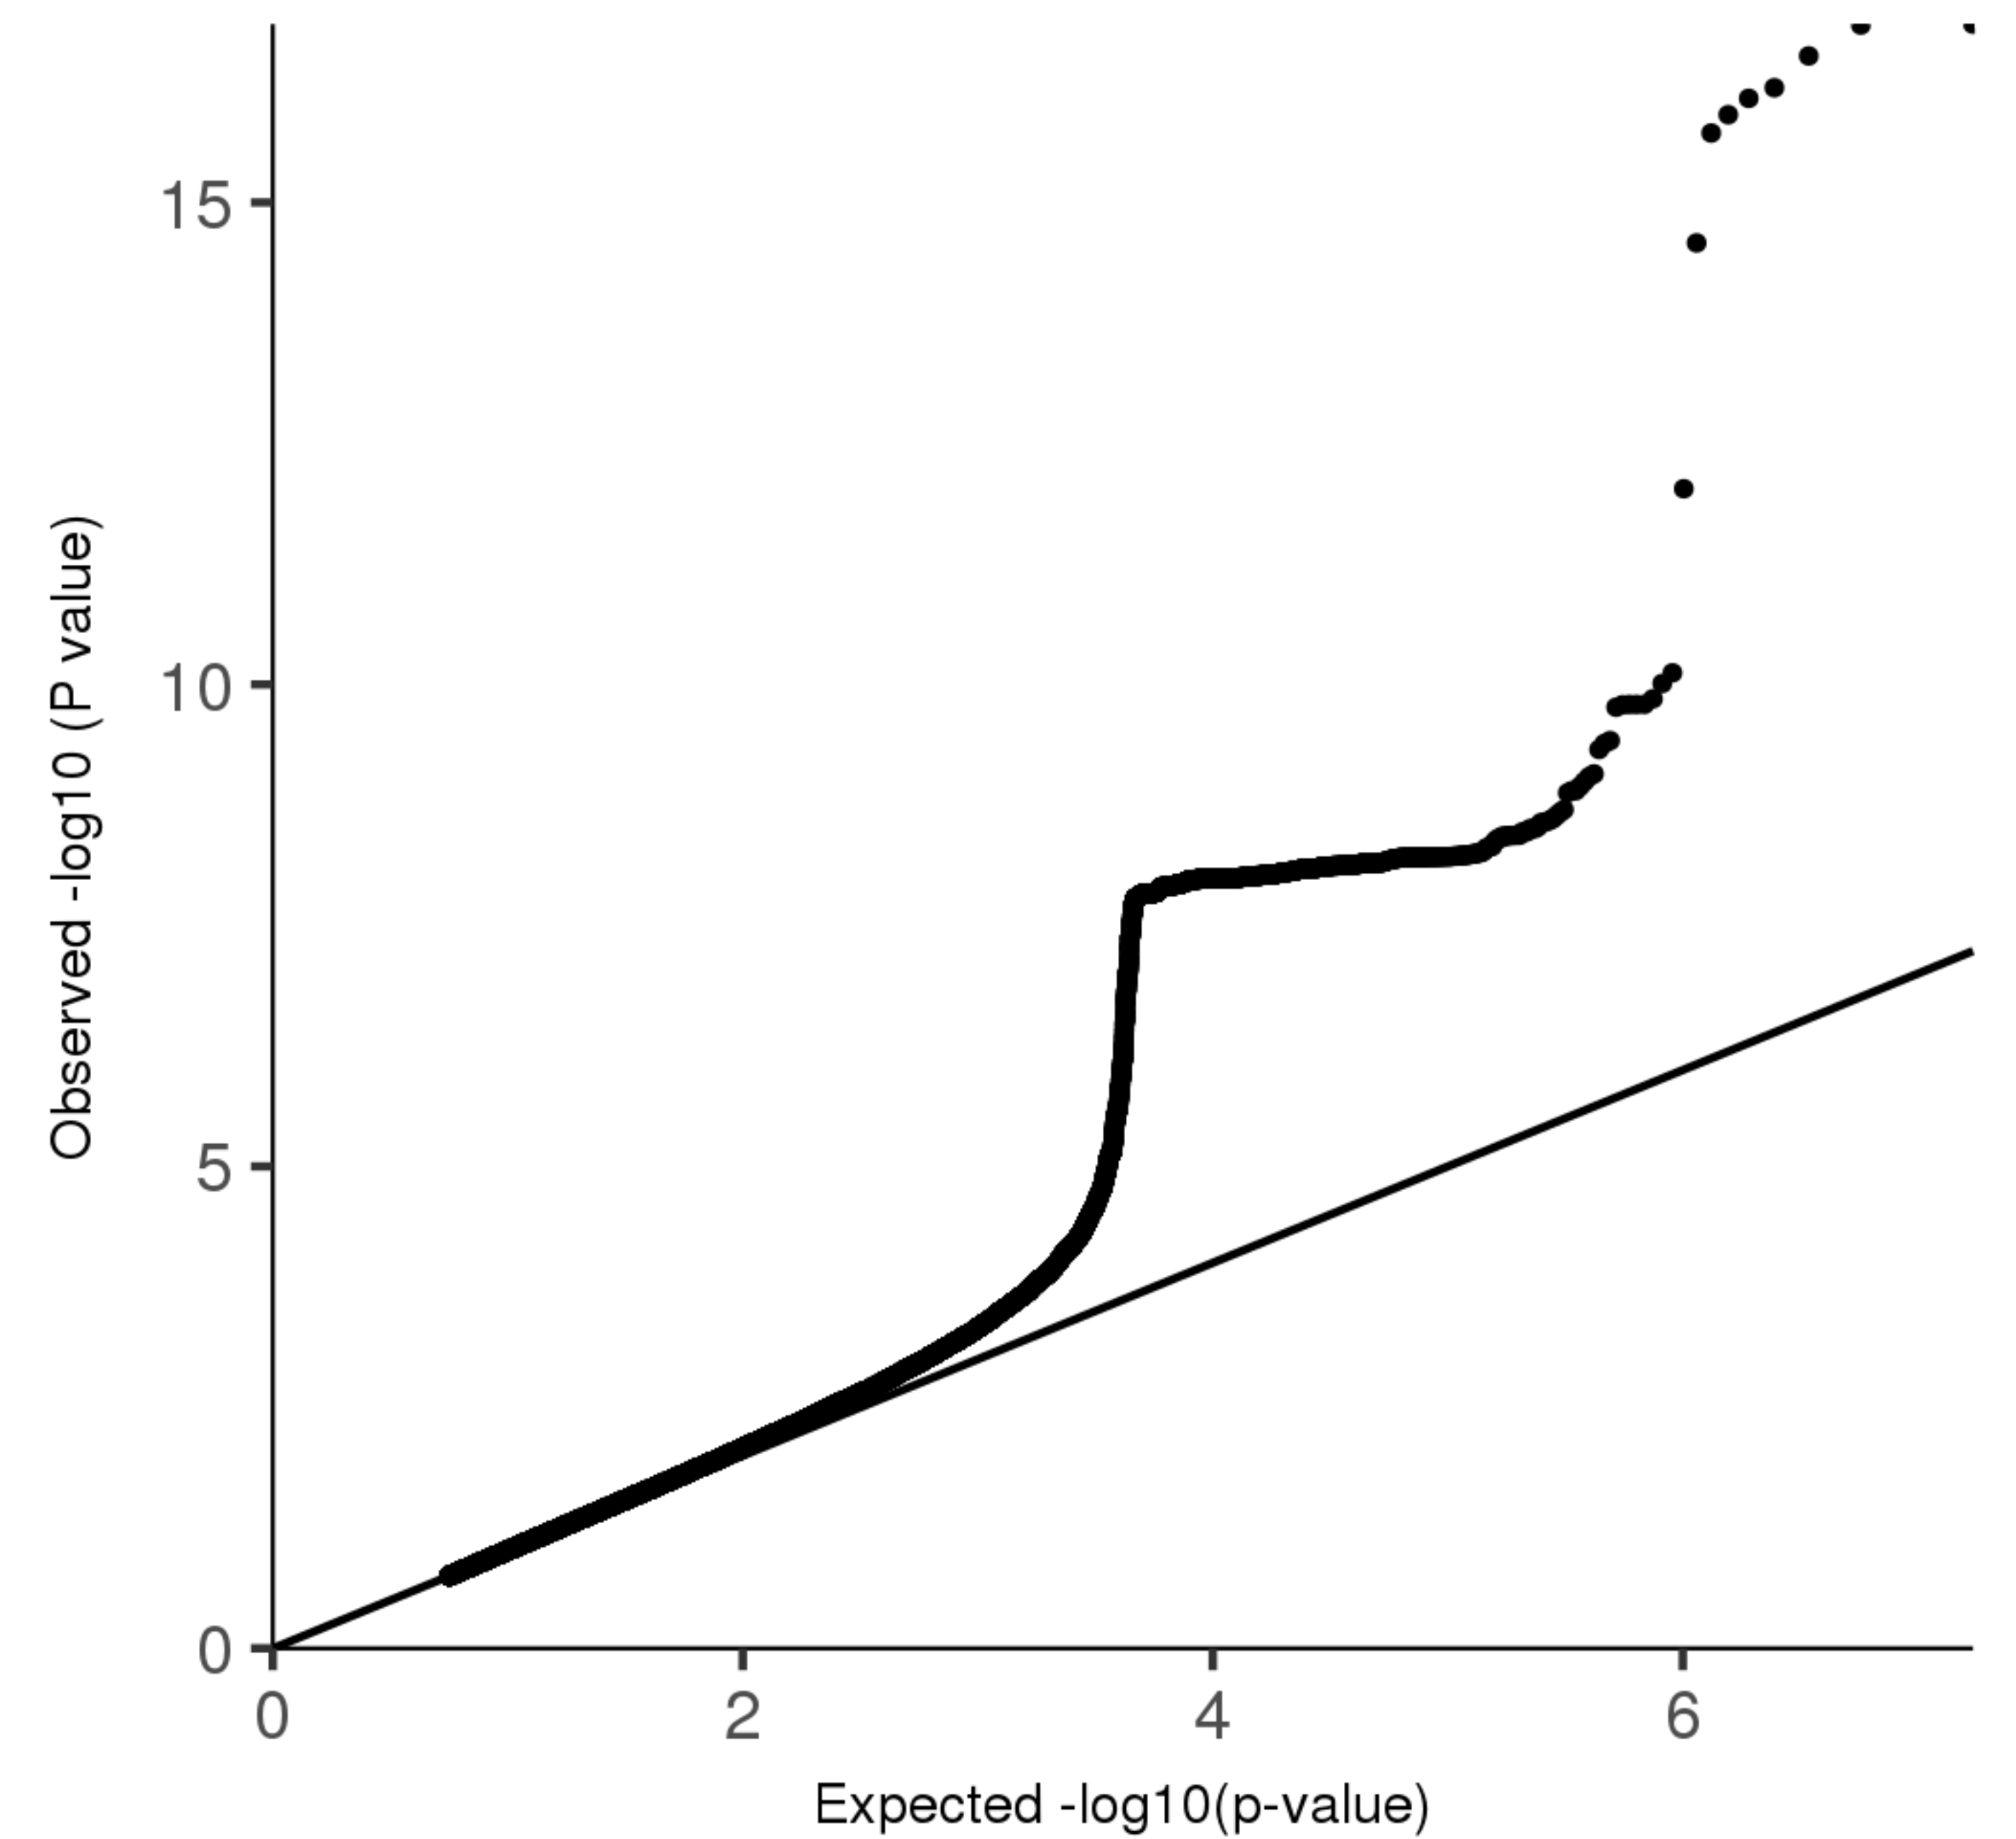

dMRI MO

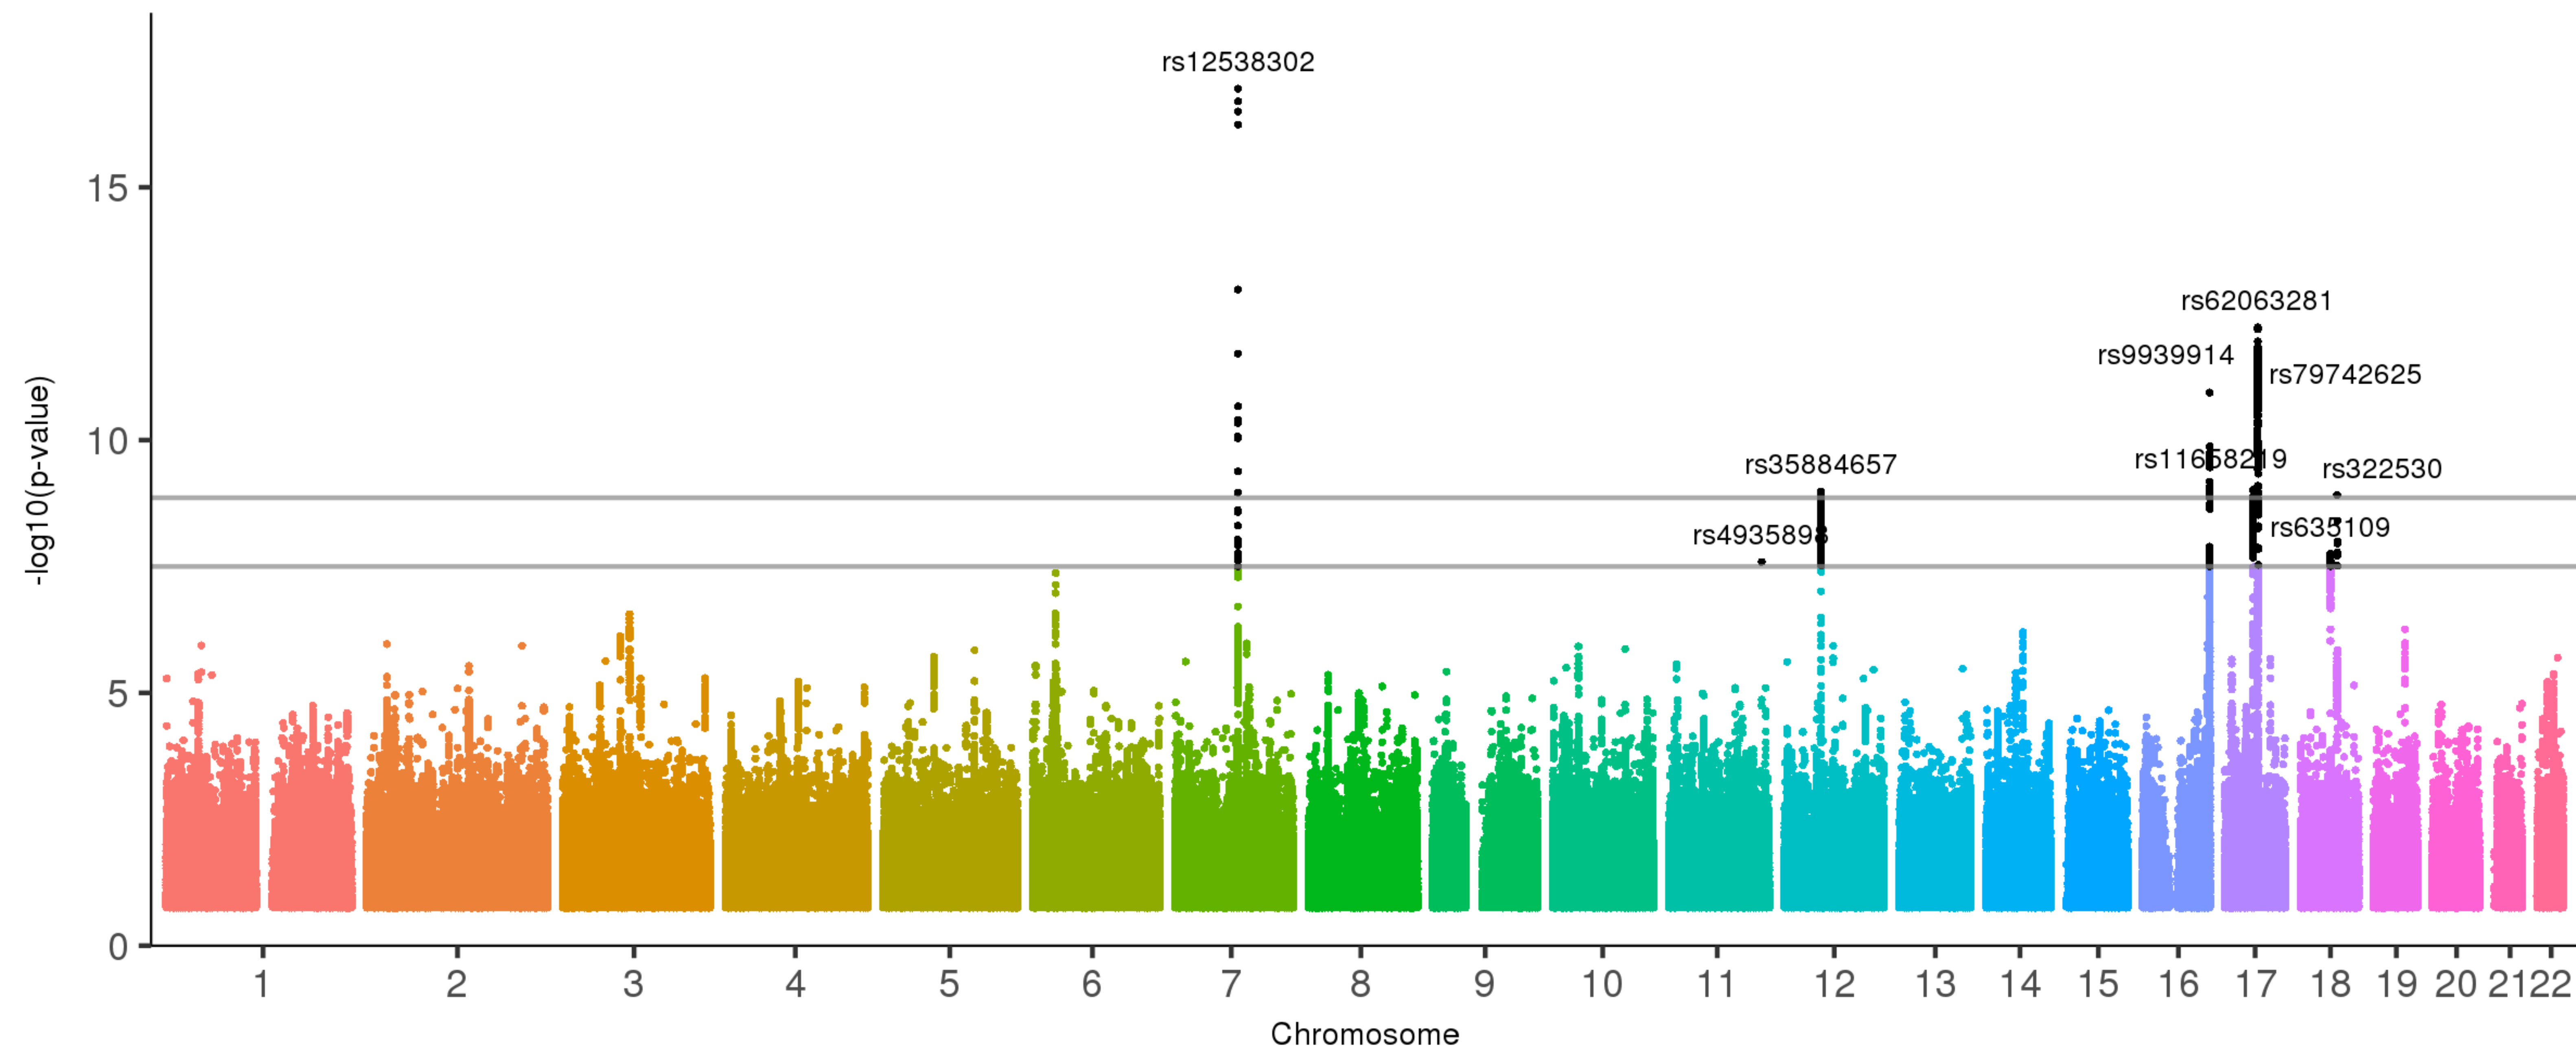

dMRI MO

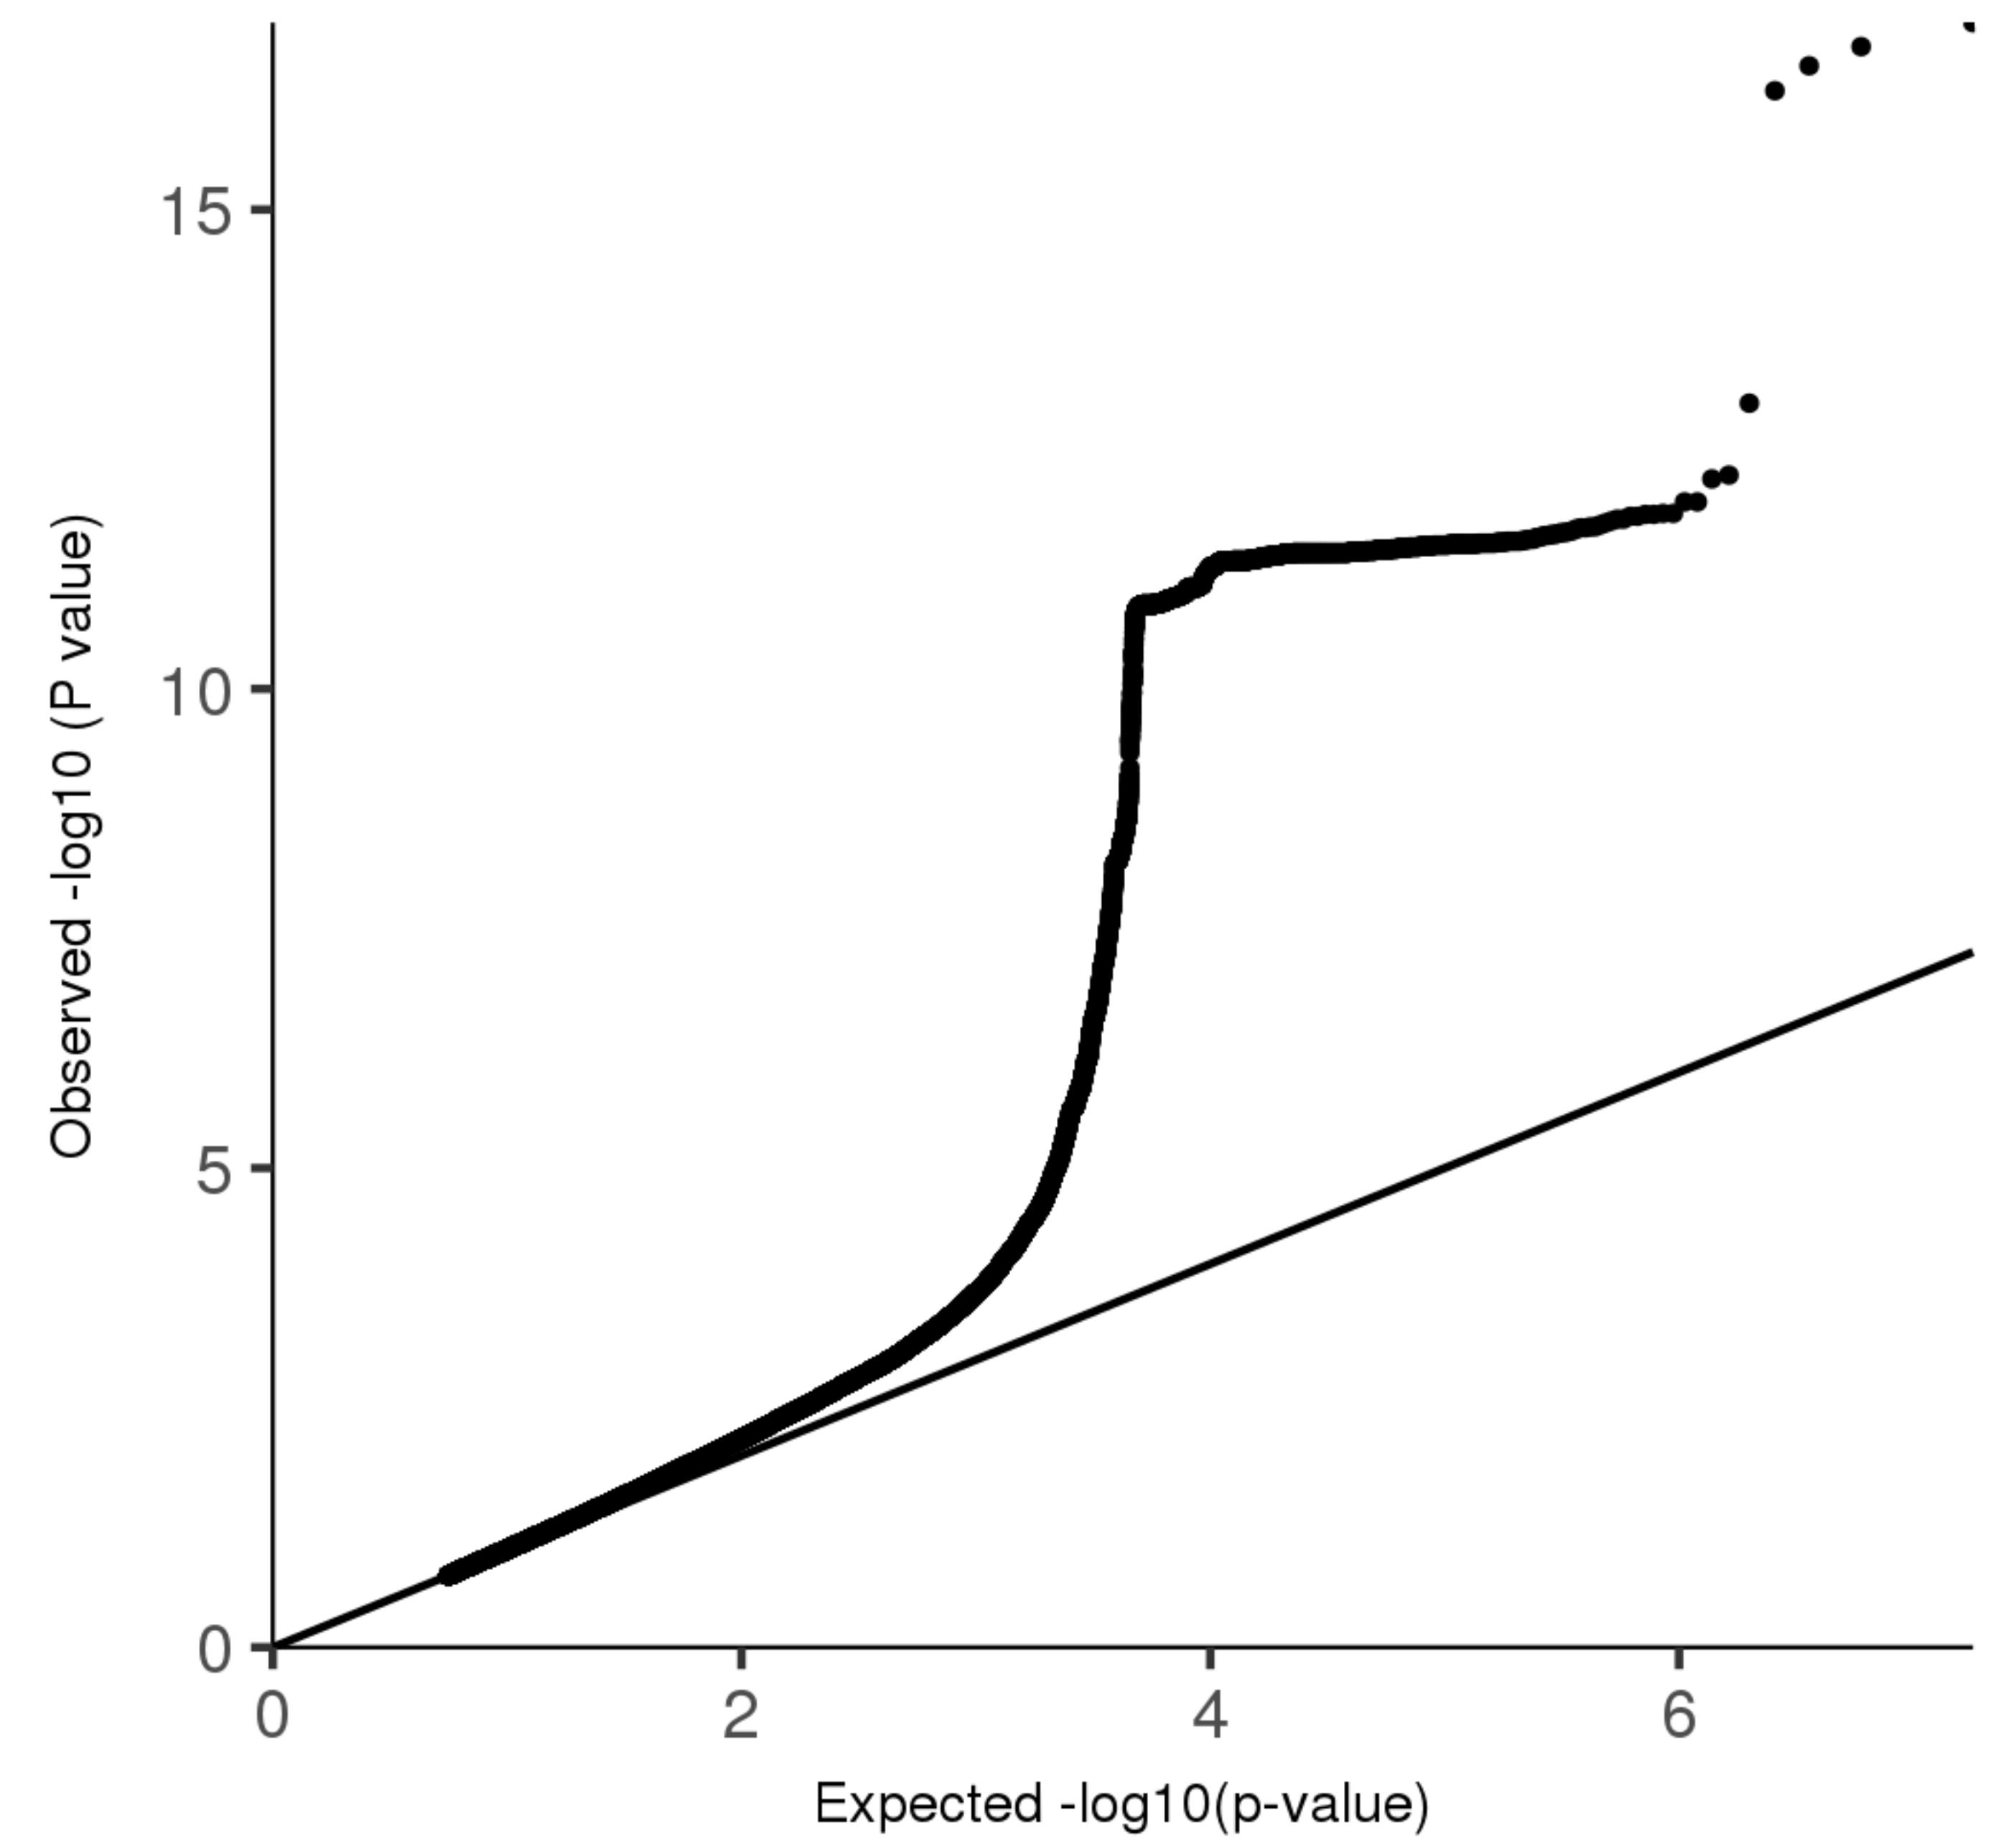

dMRI L1

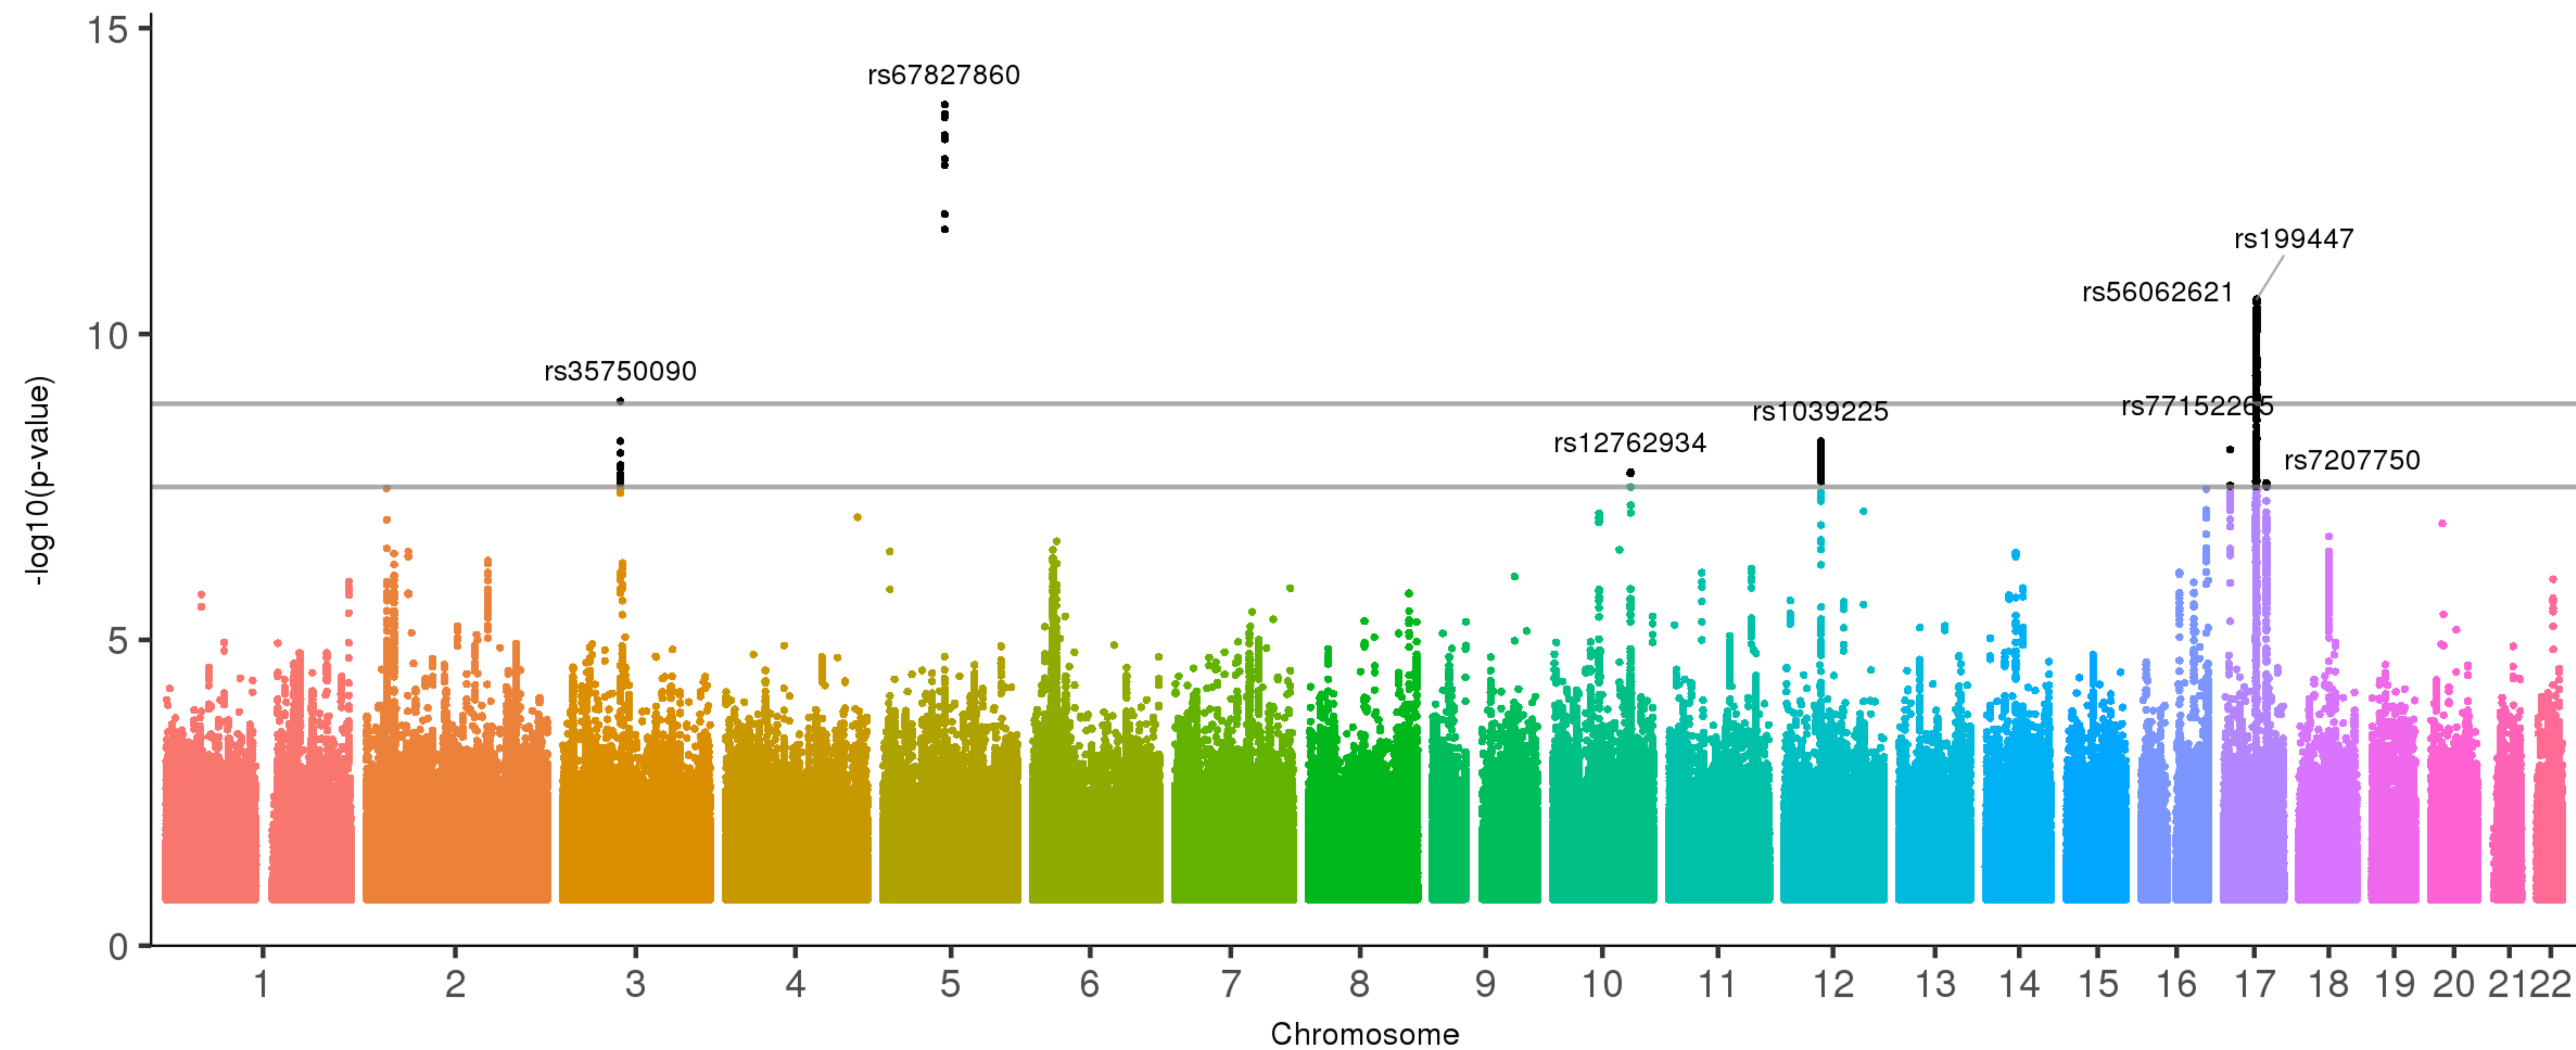

dMRI L1

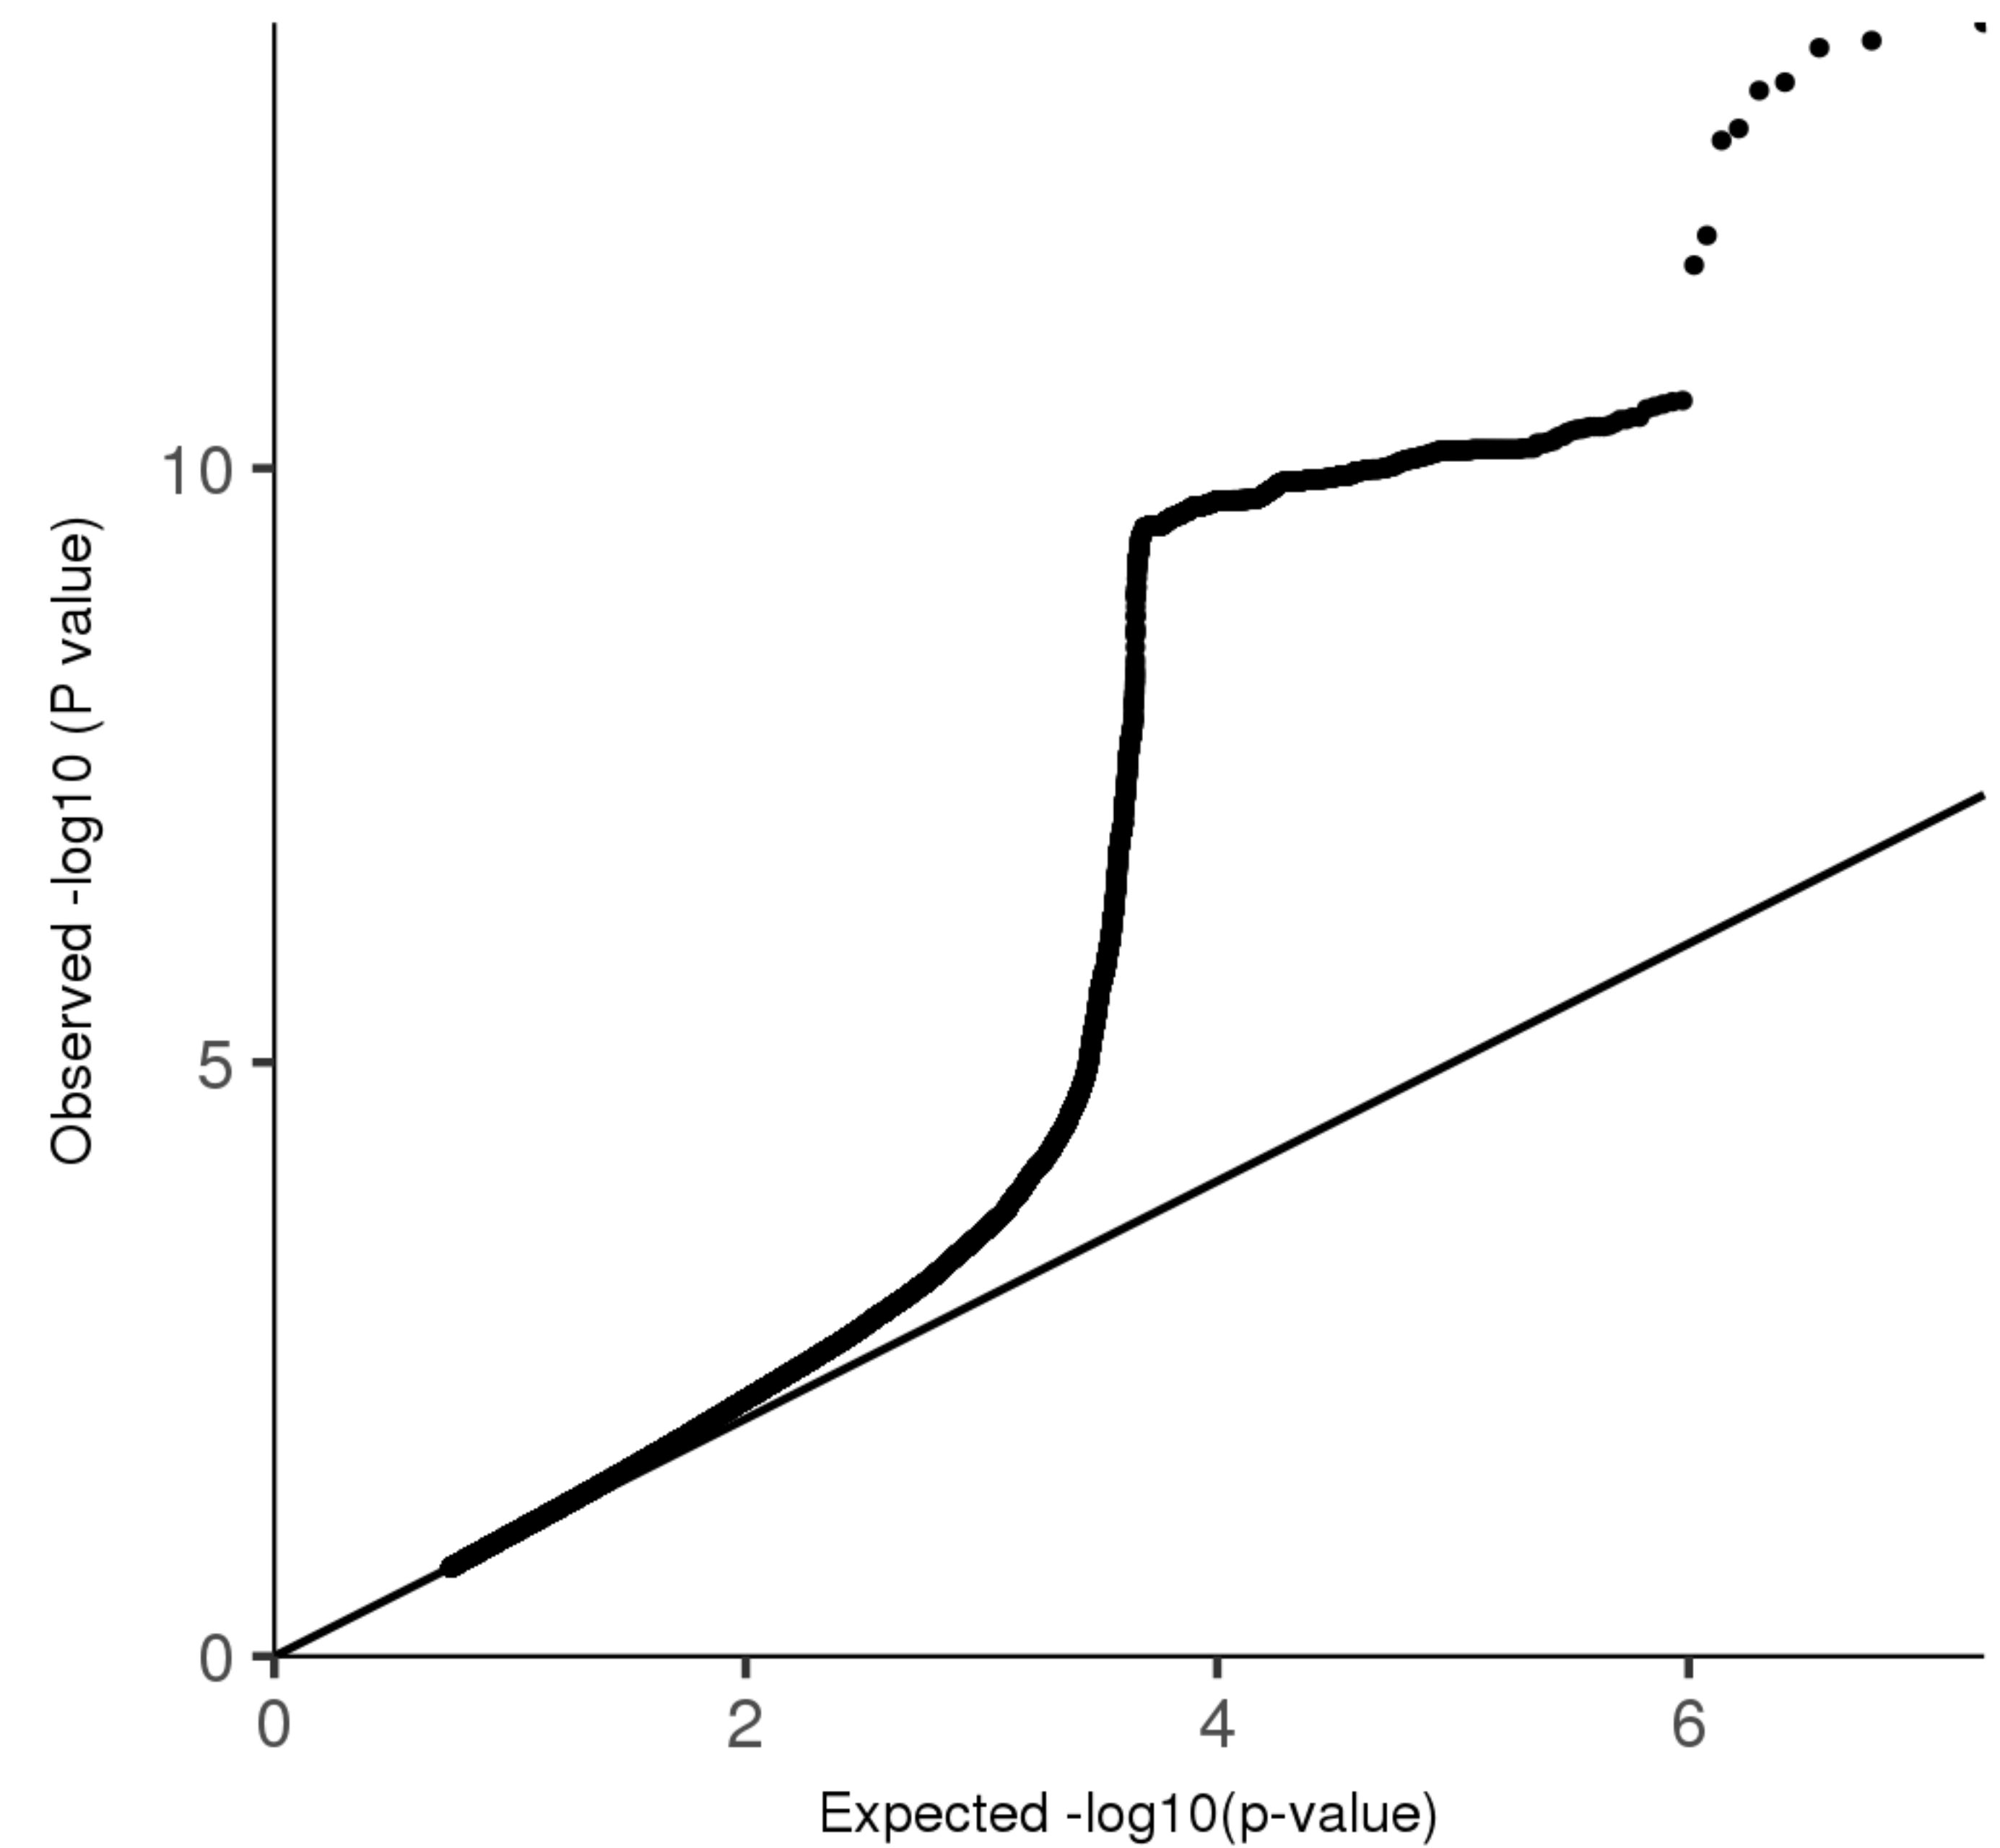



dMRI L2

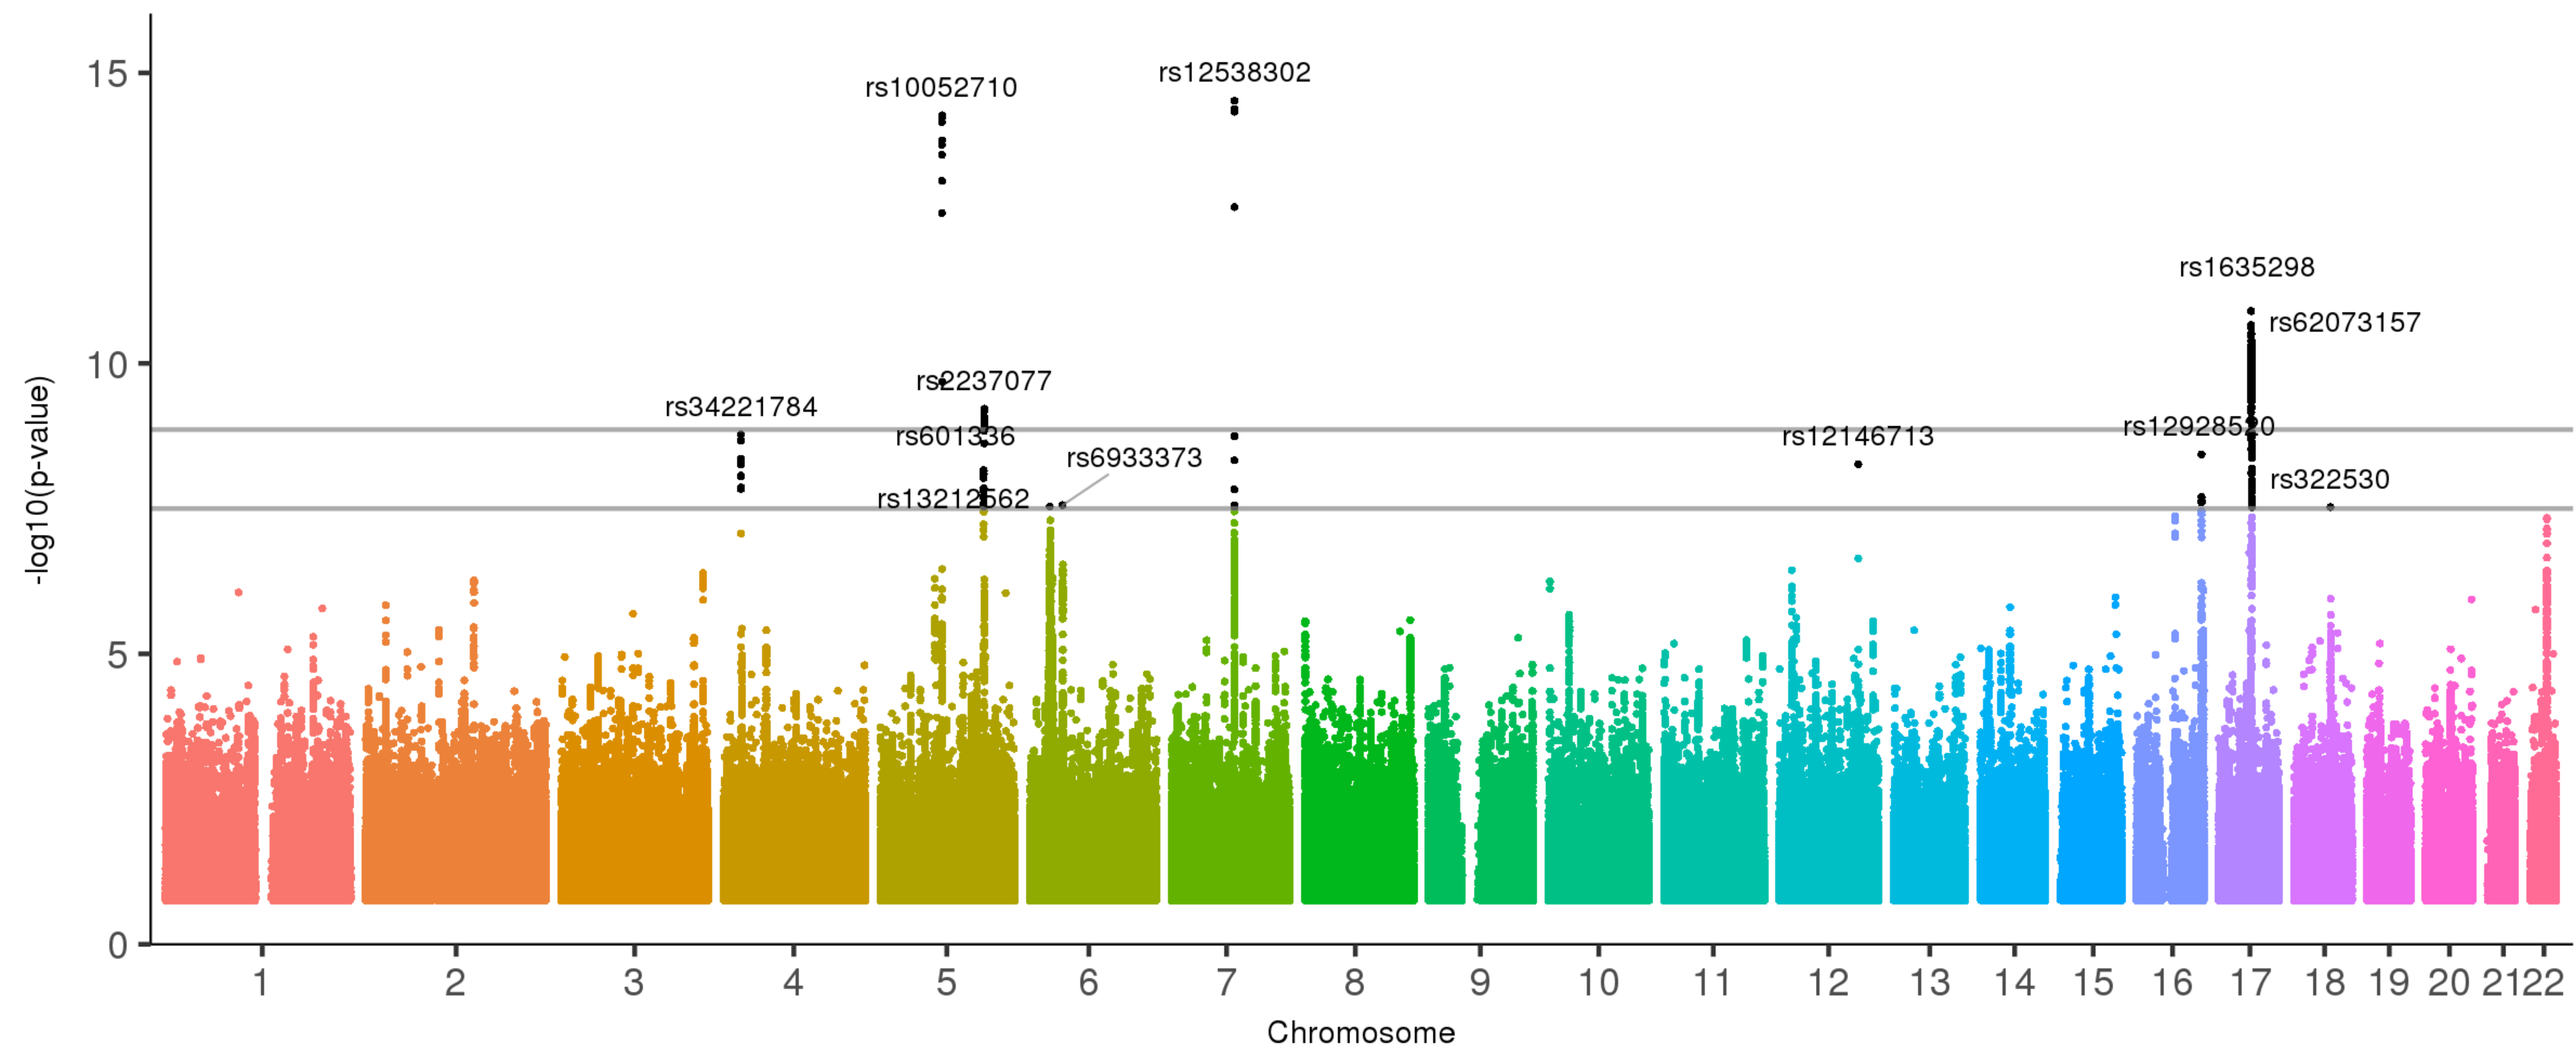

dMRI L2

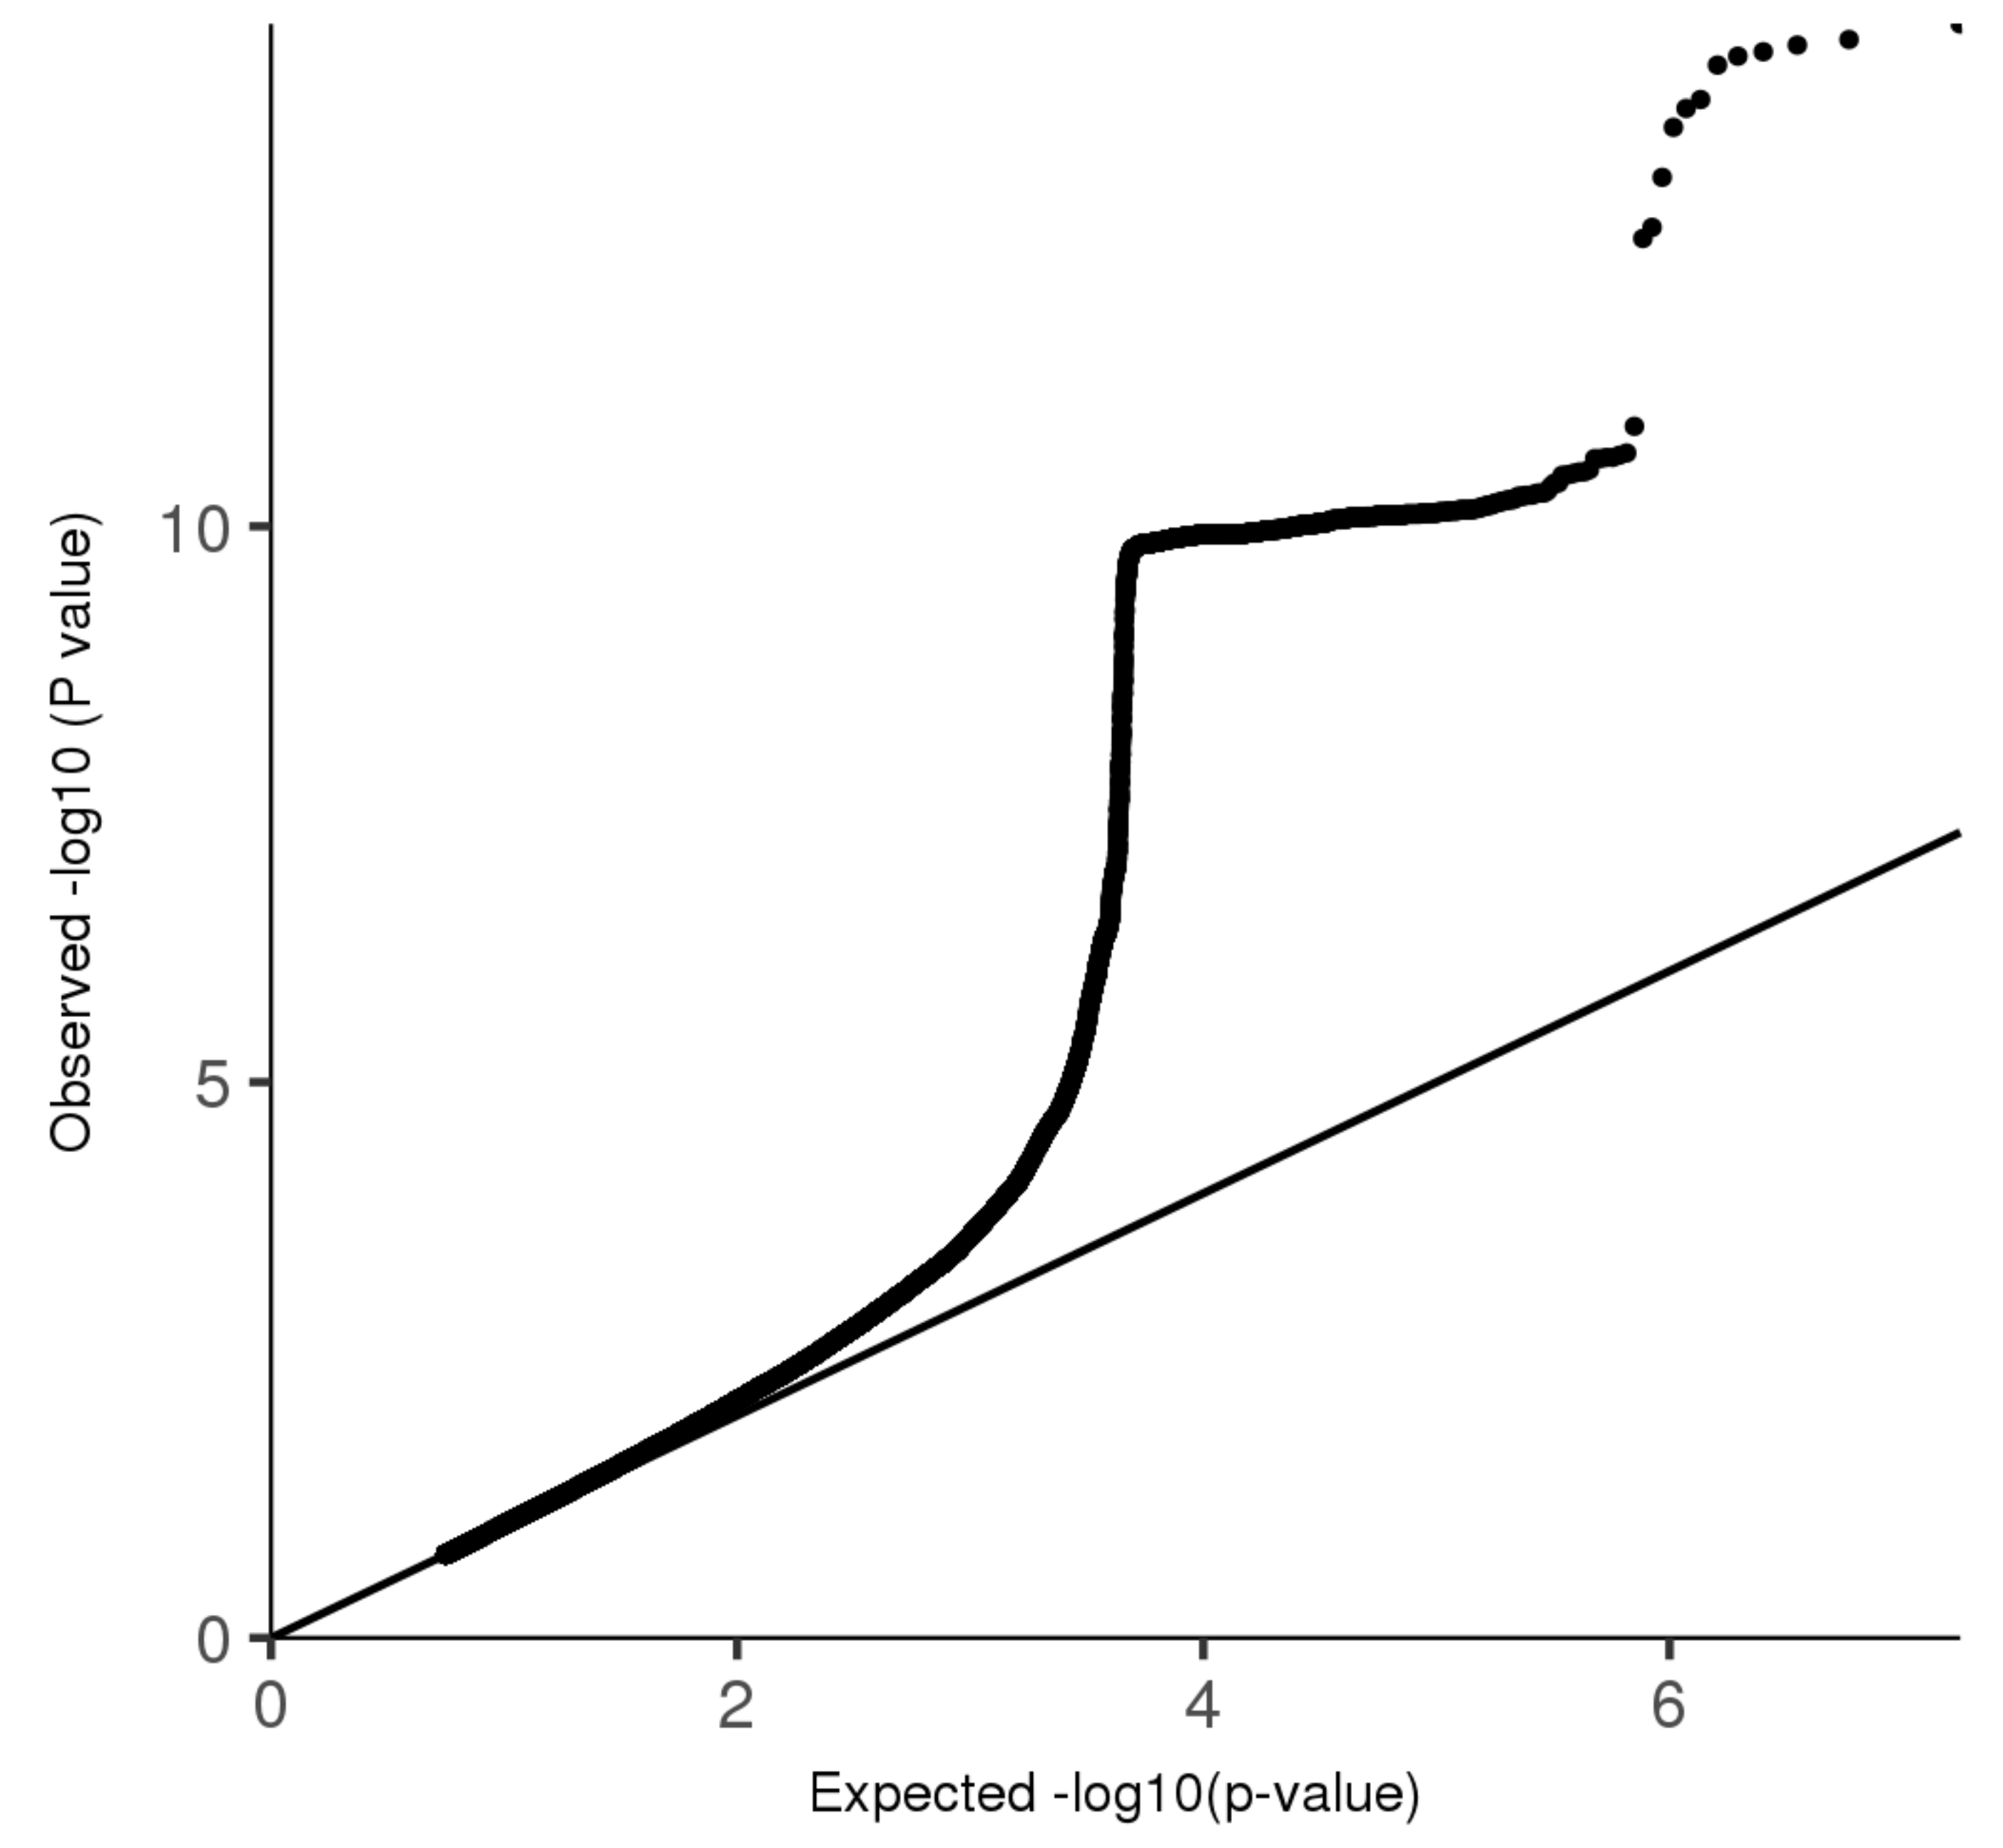

dMRI L3

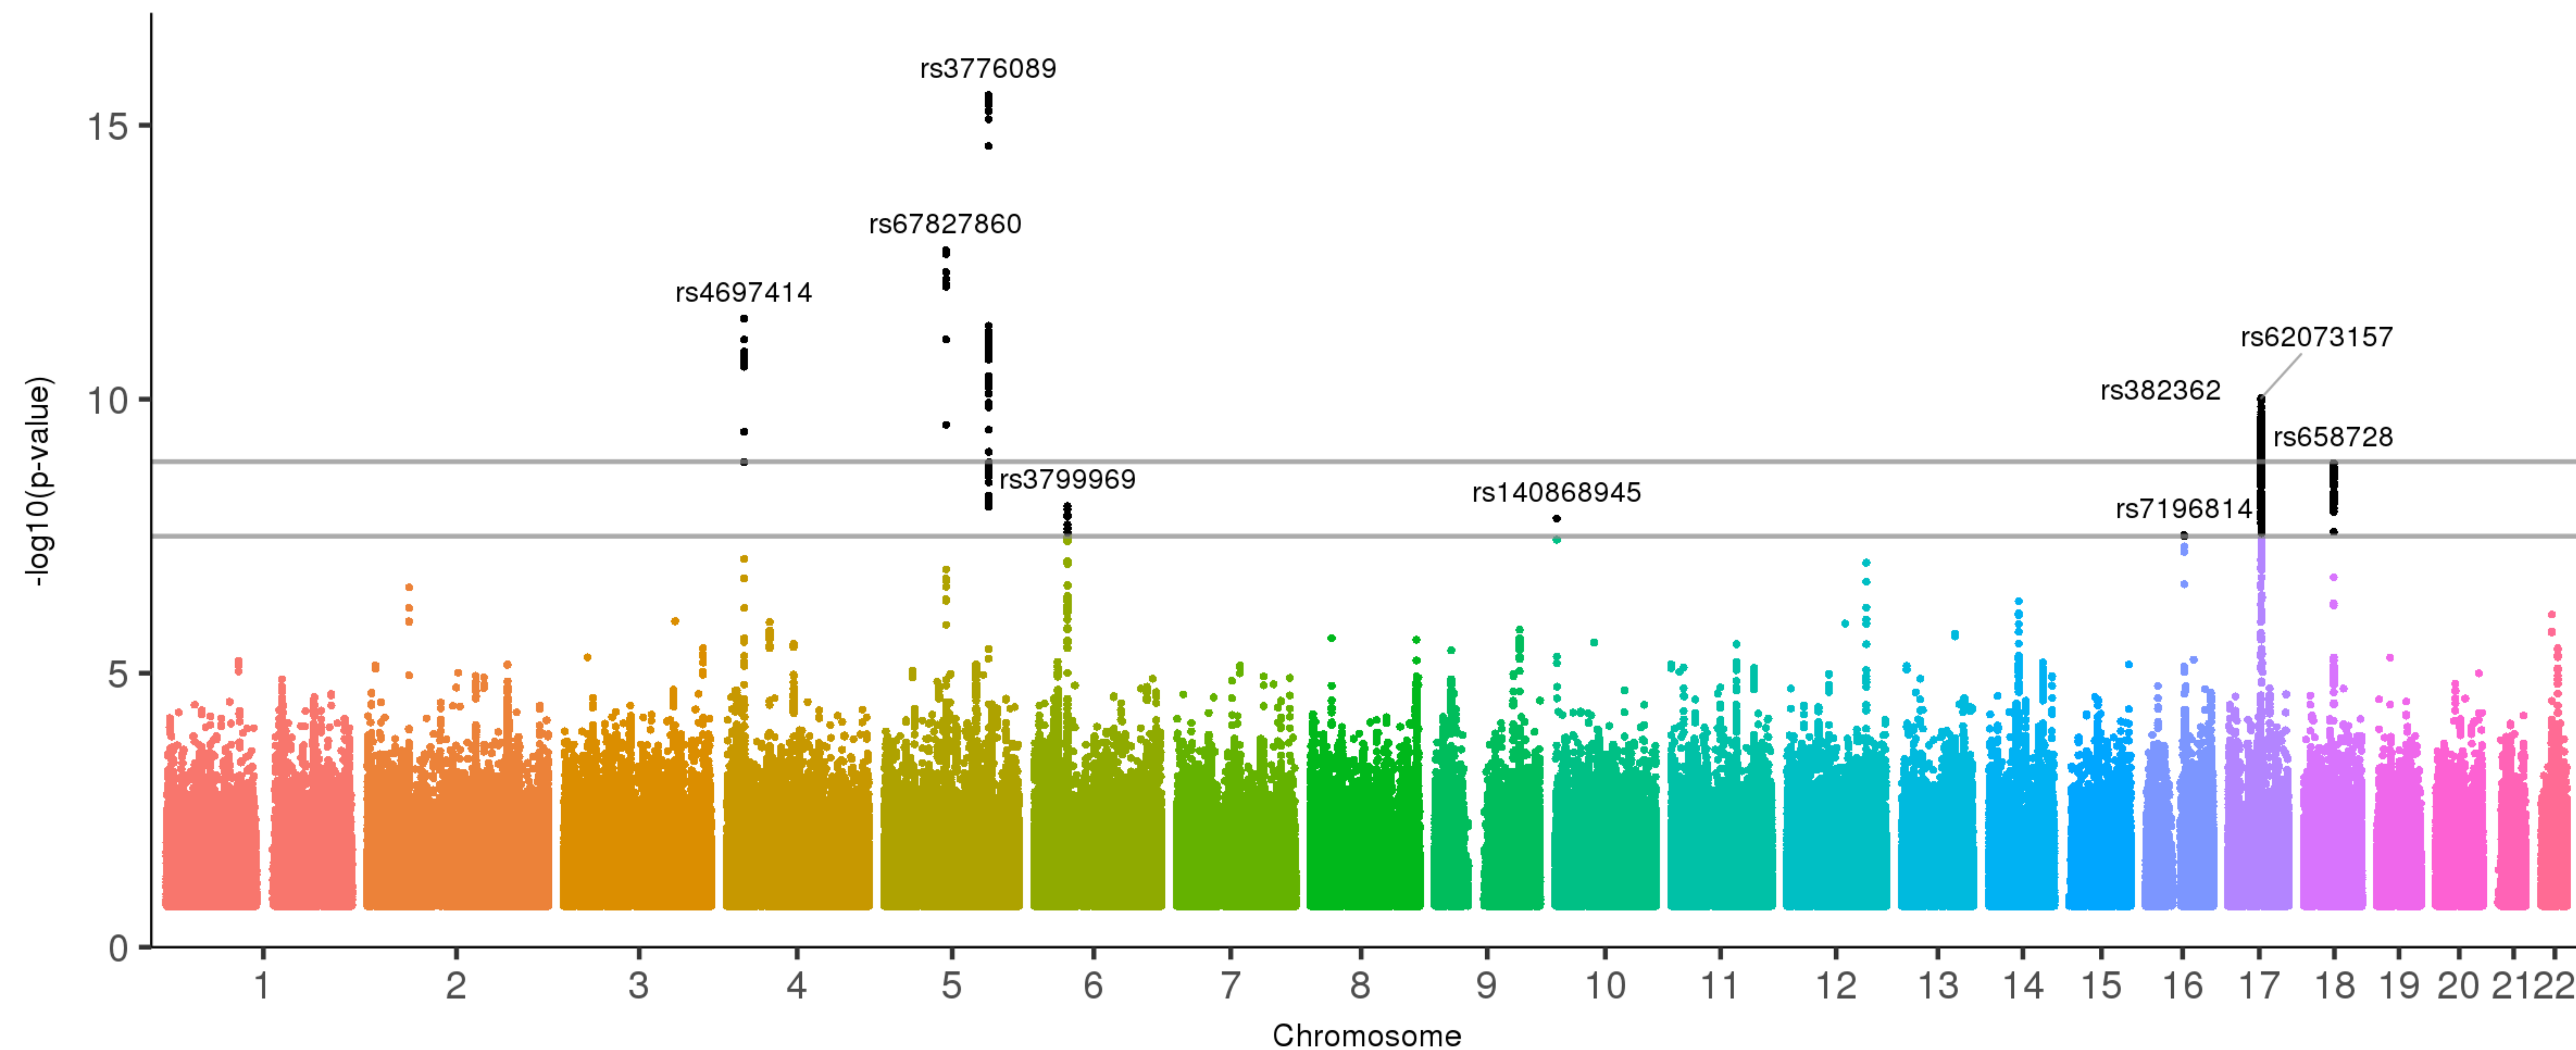

dMRI L3

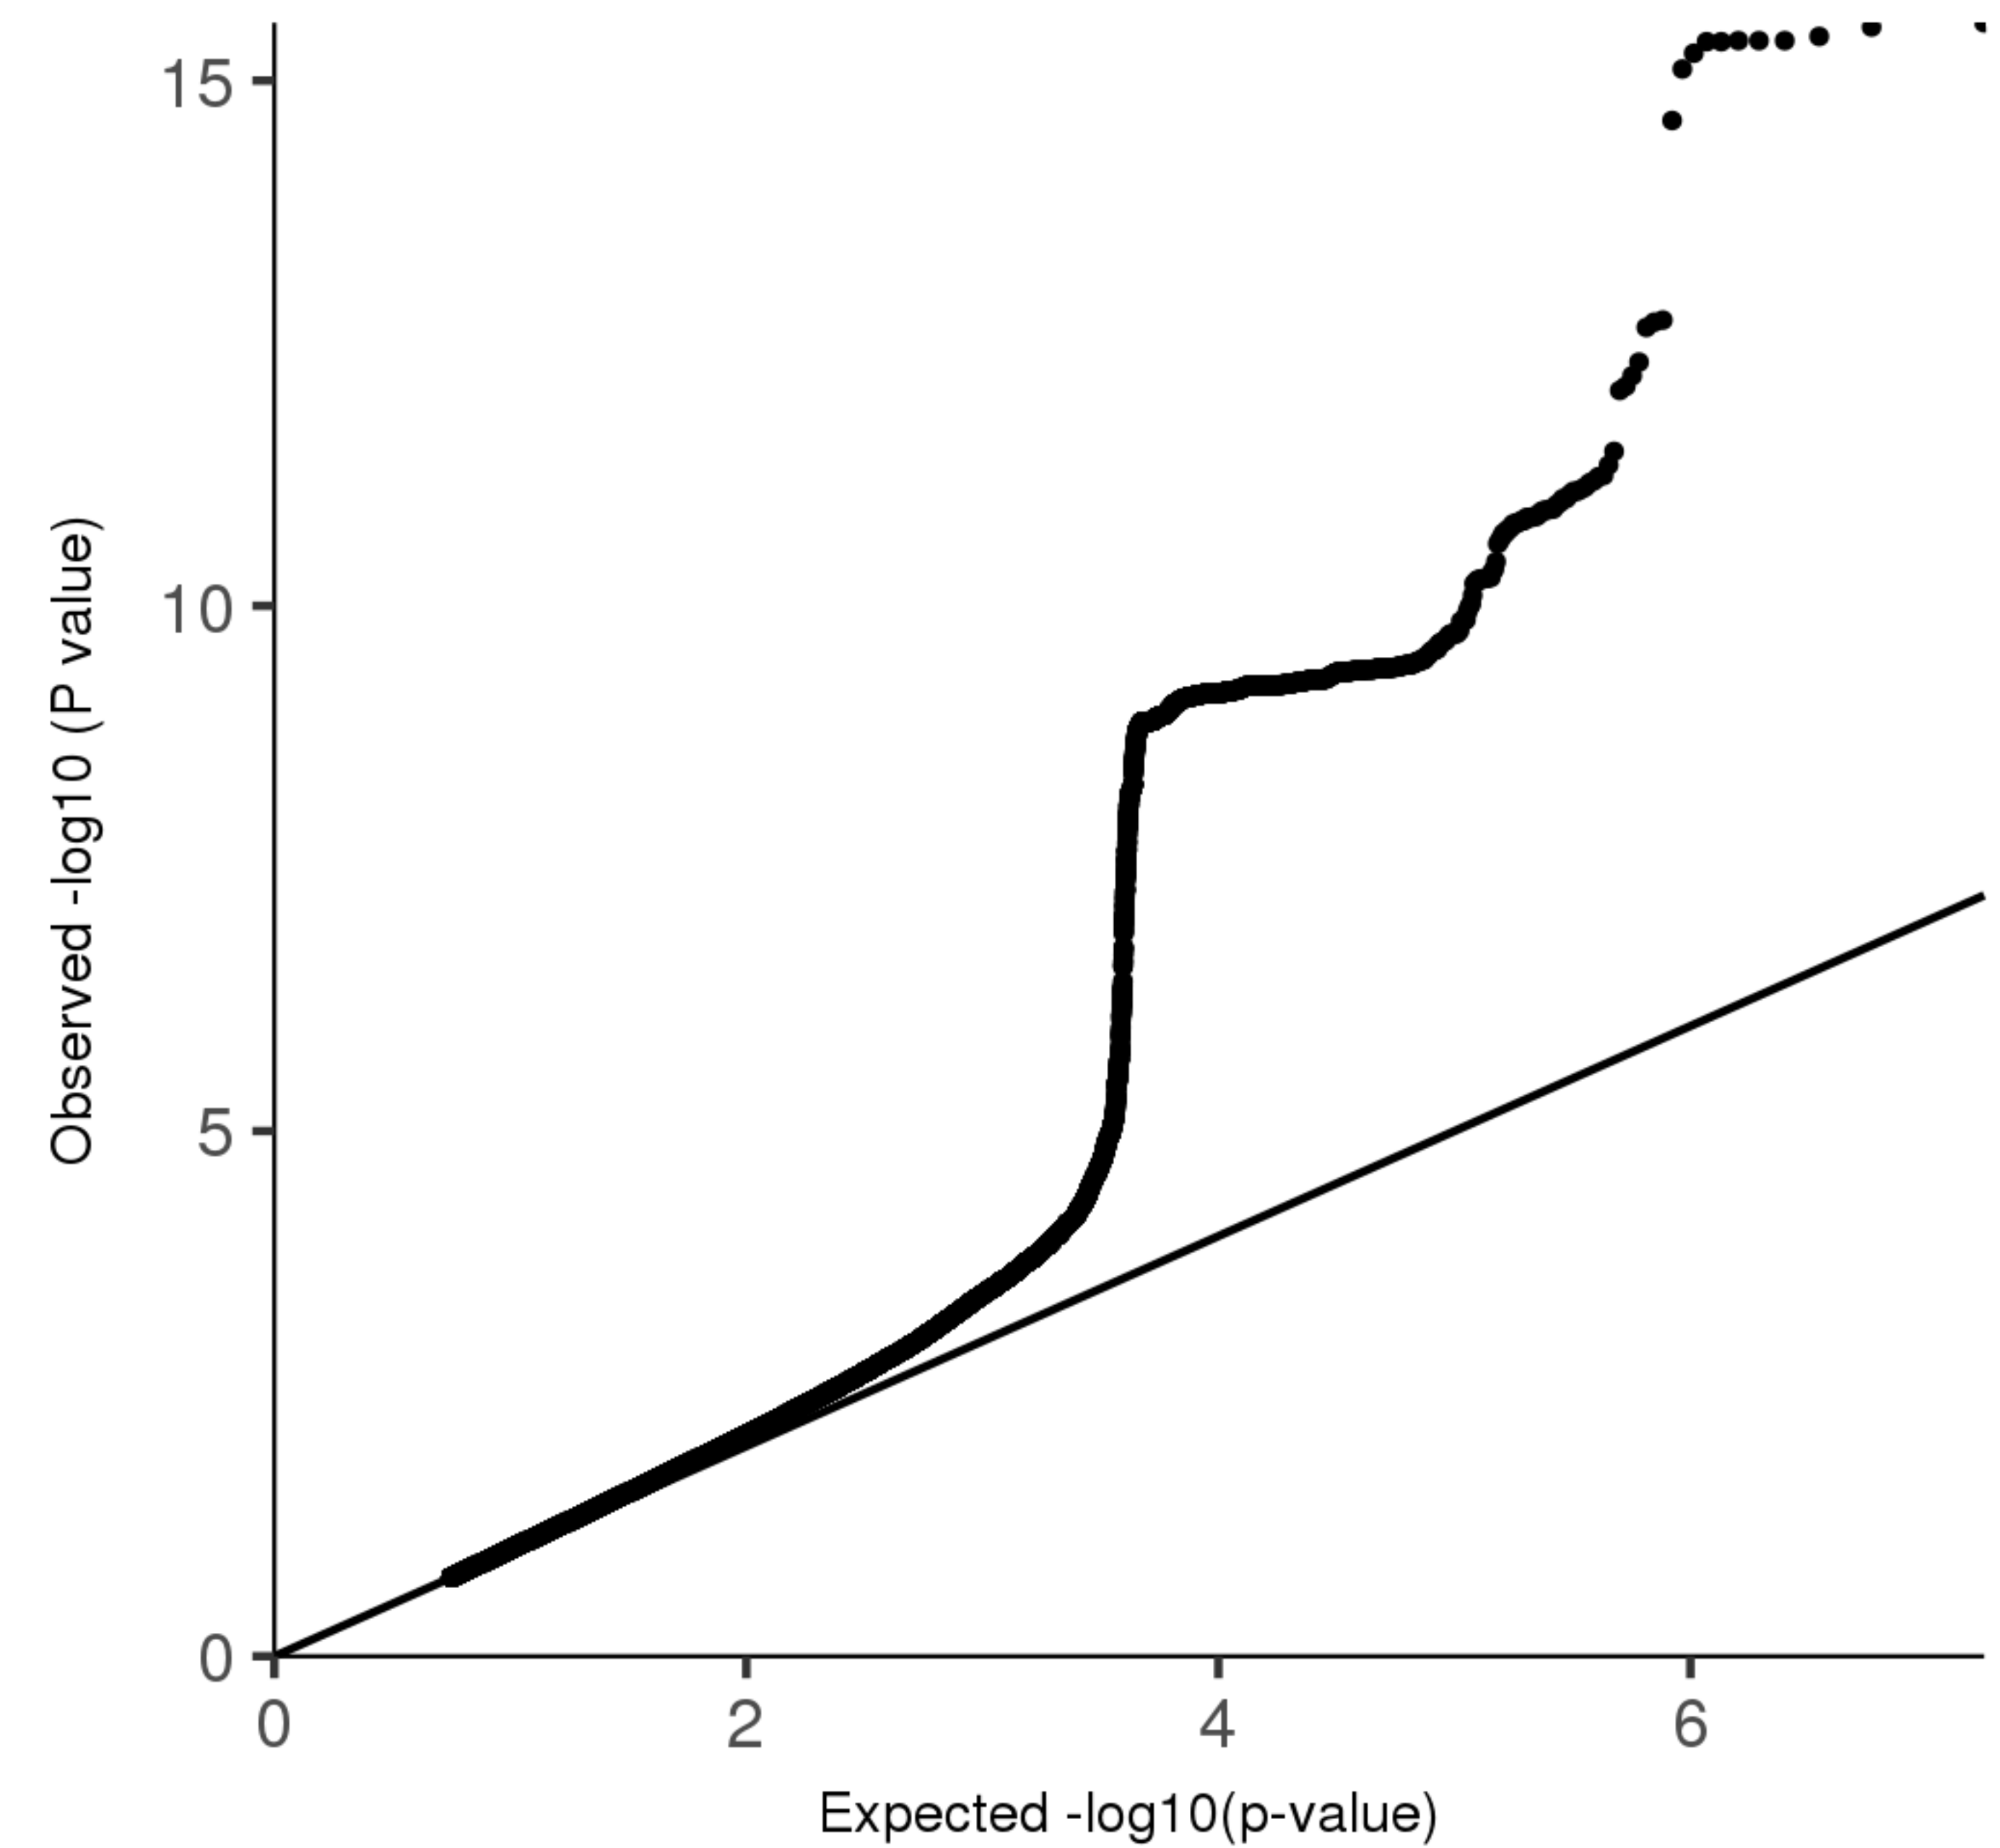

dMRI ICVF

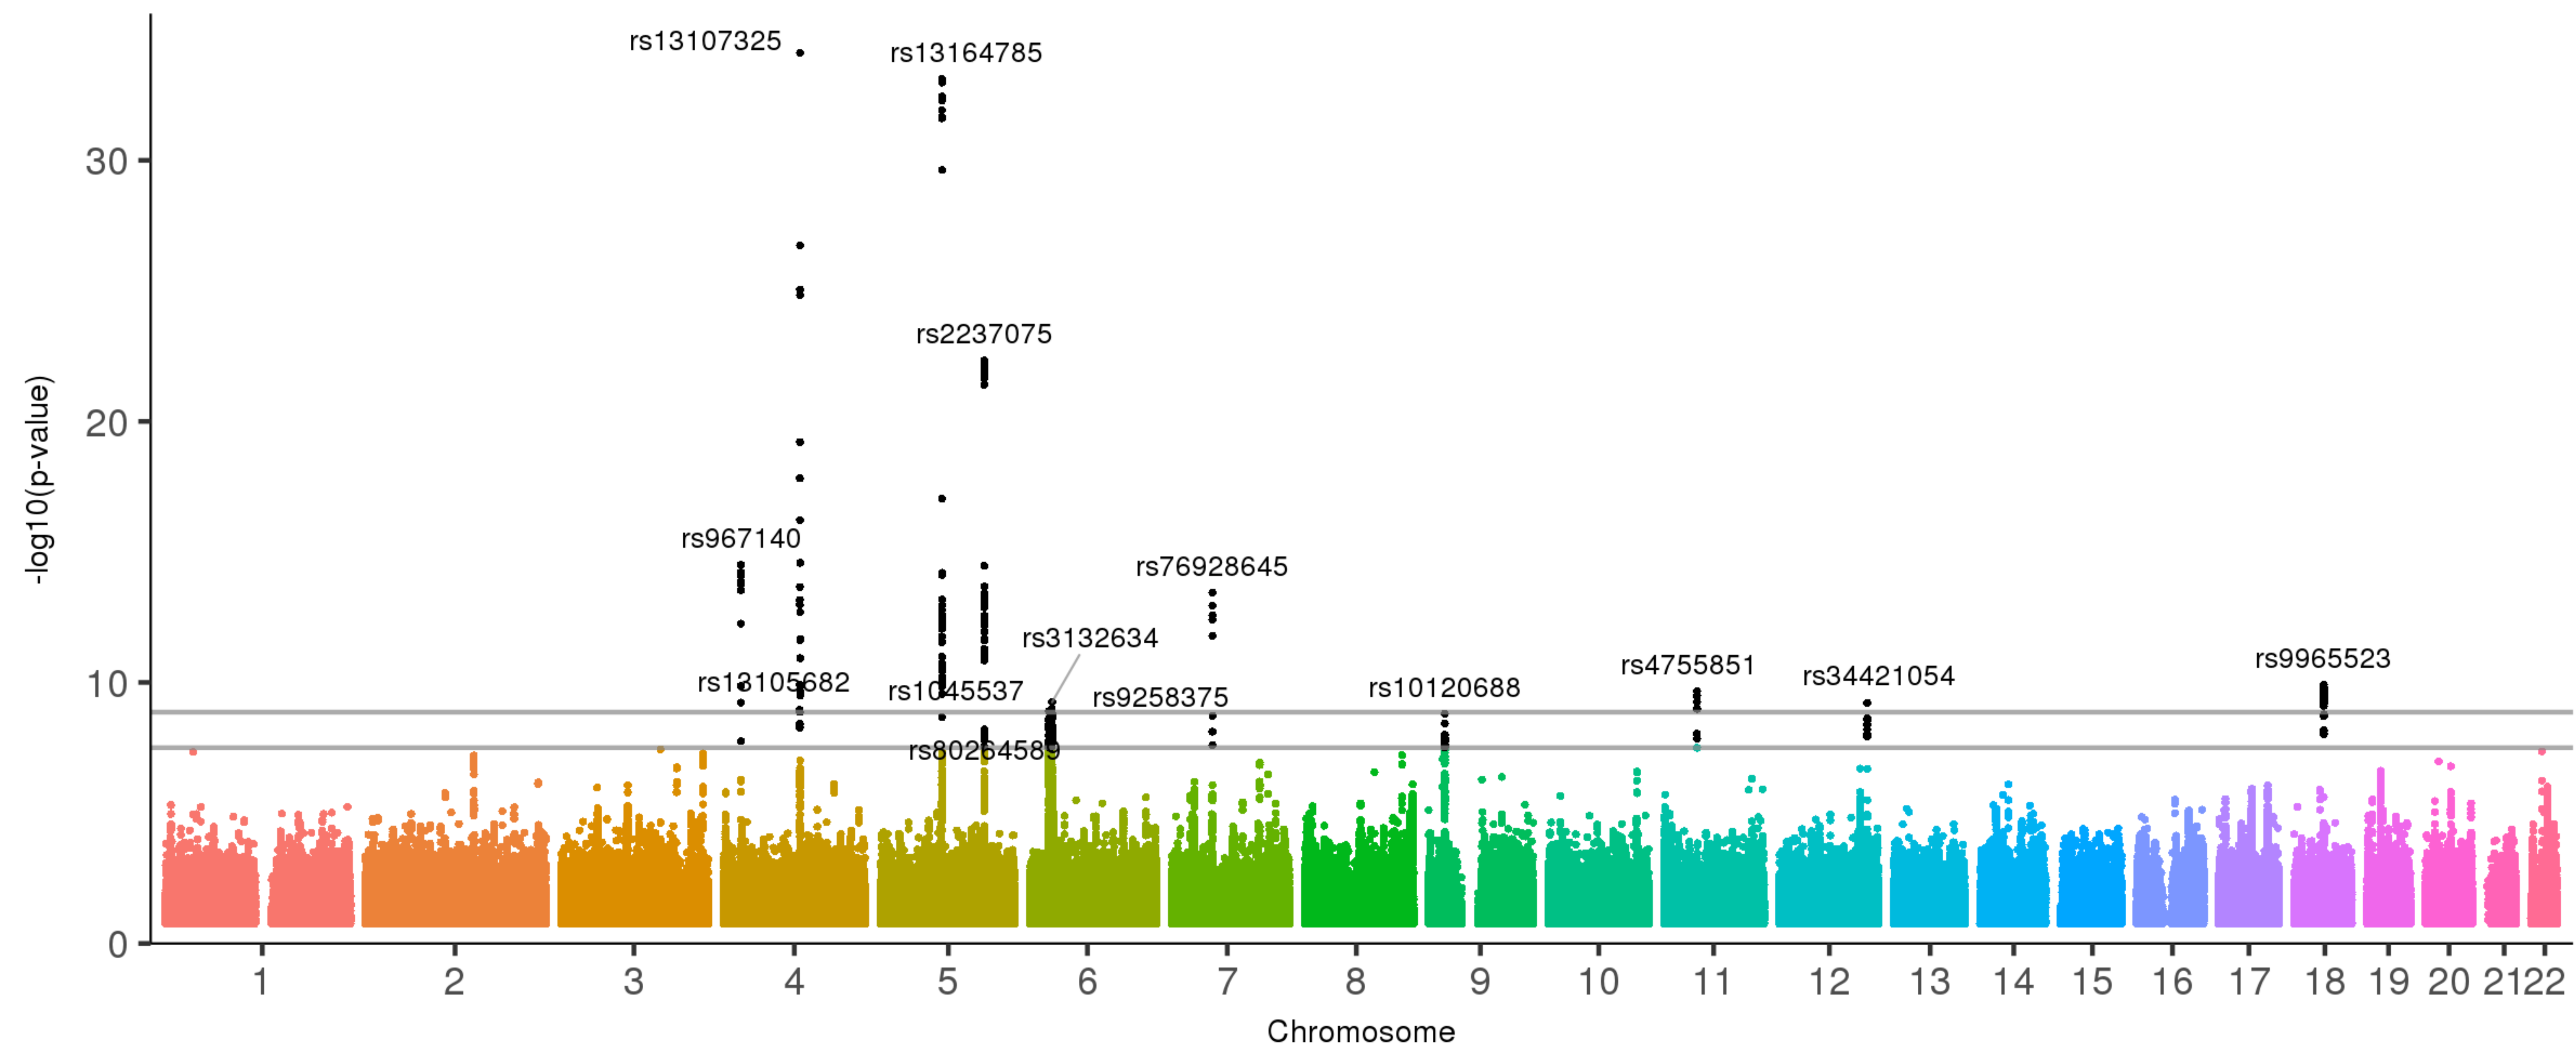

dMRI ICVF

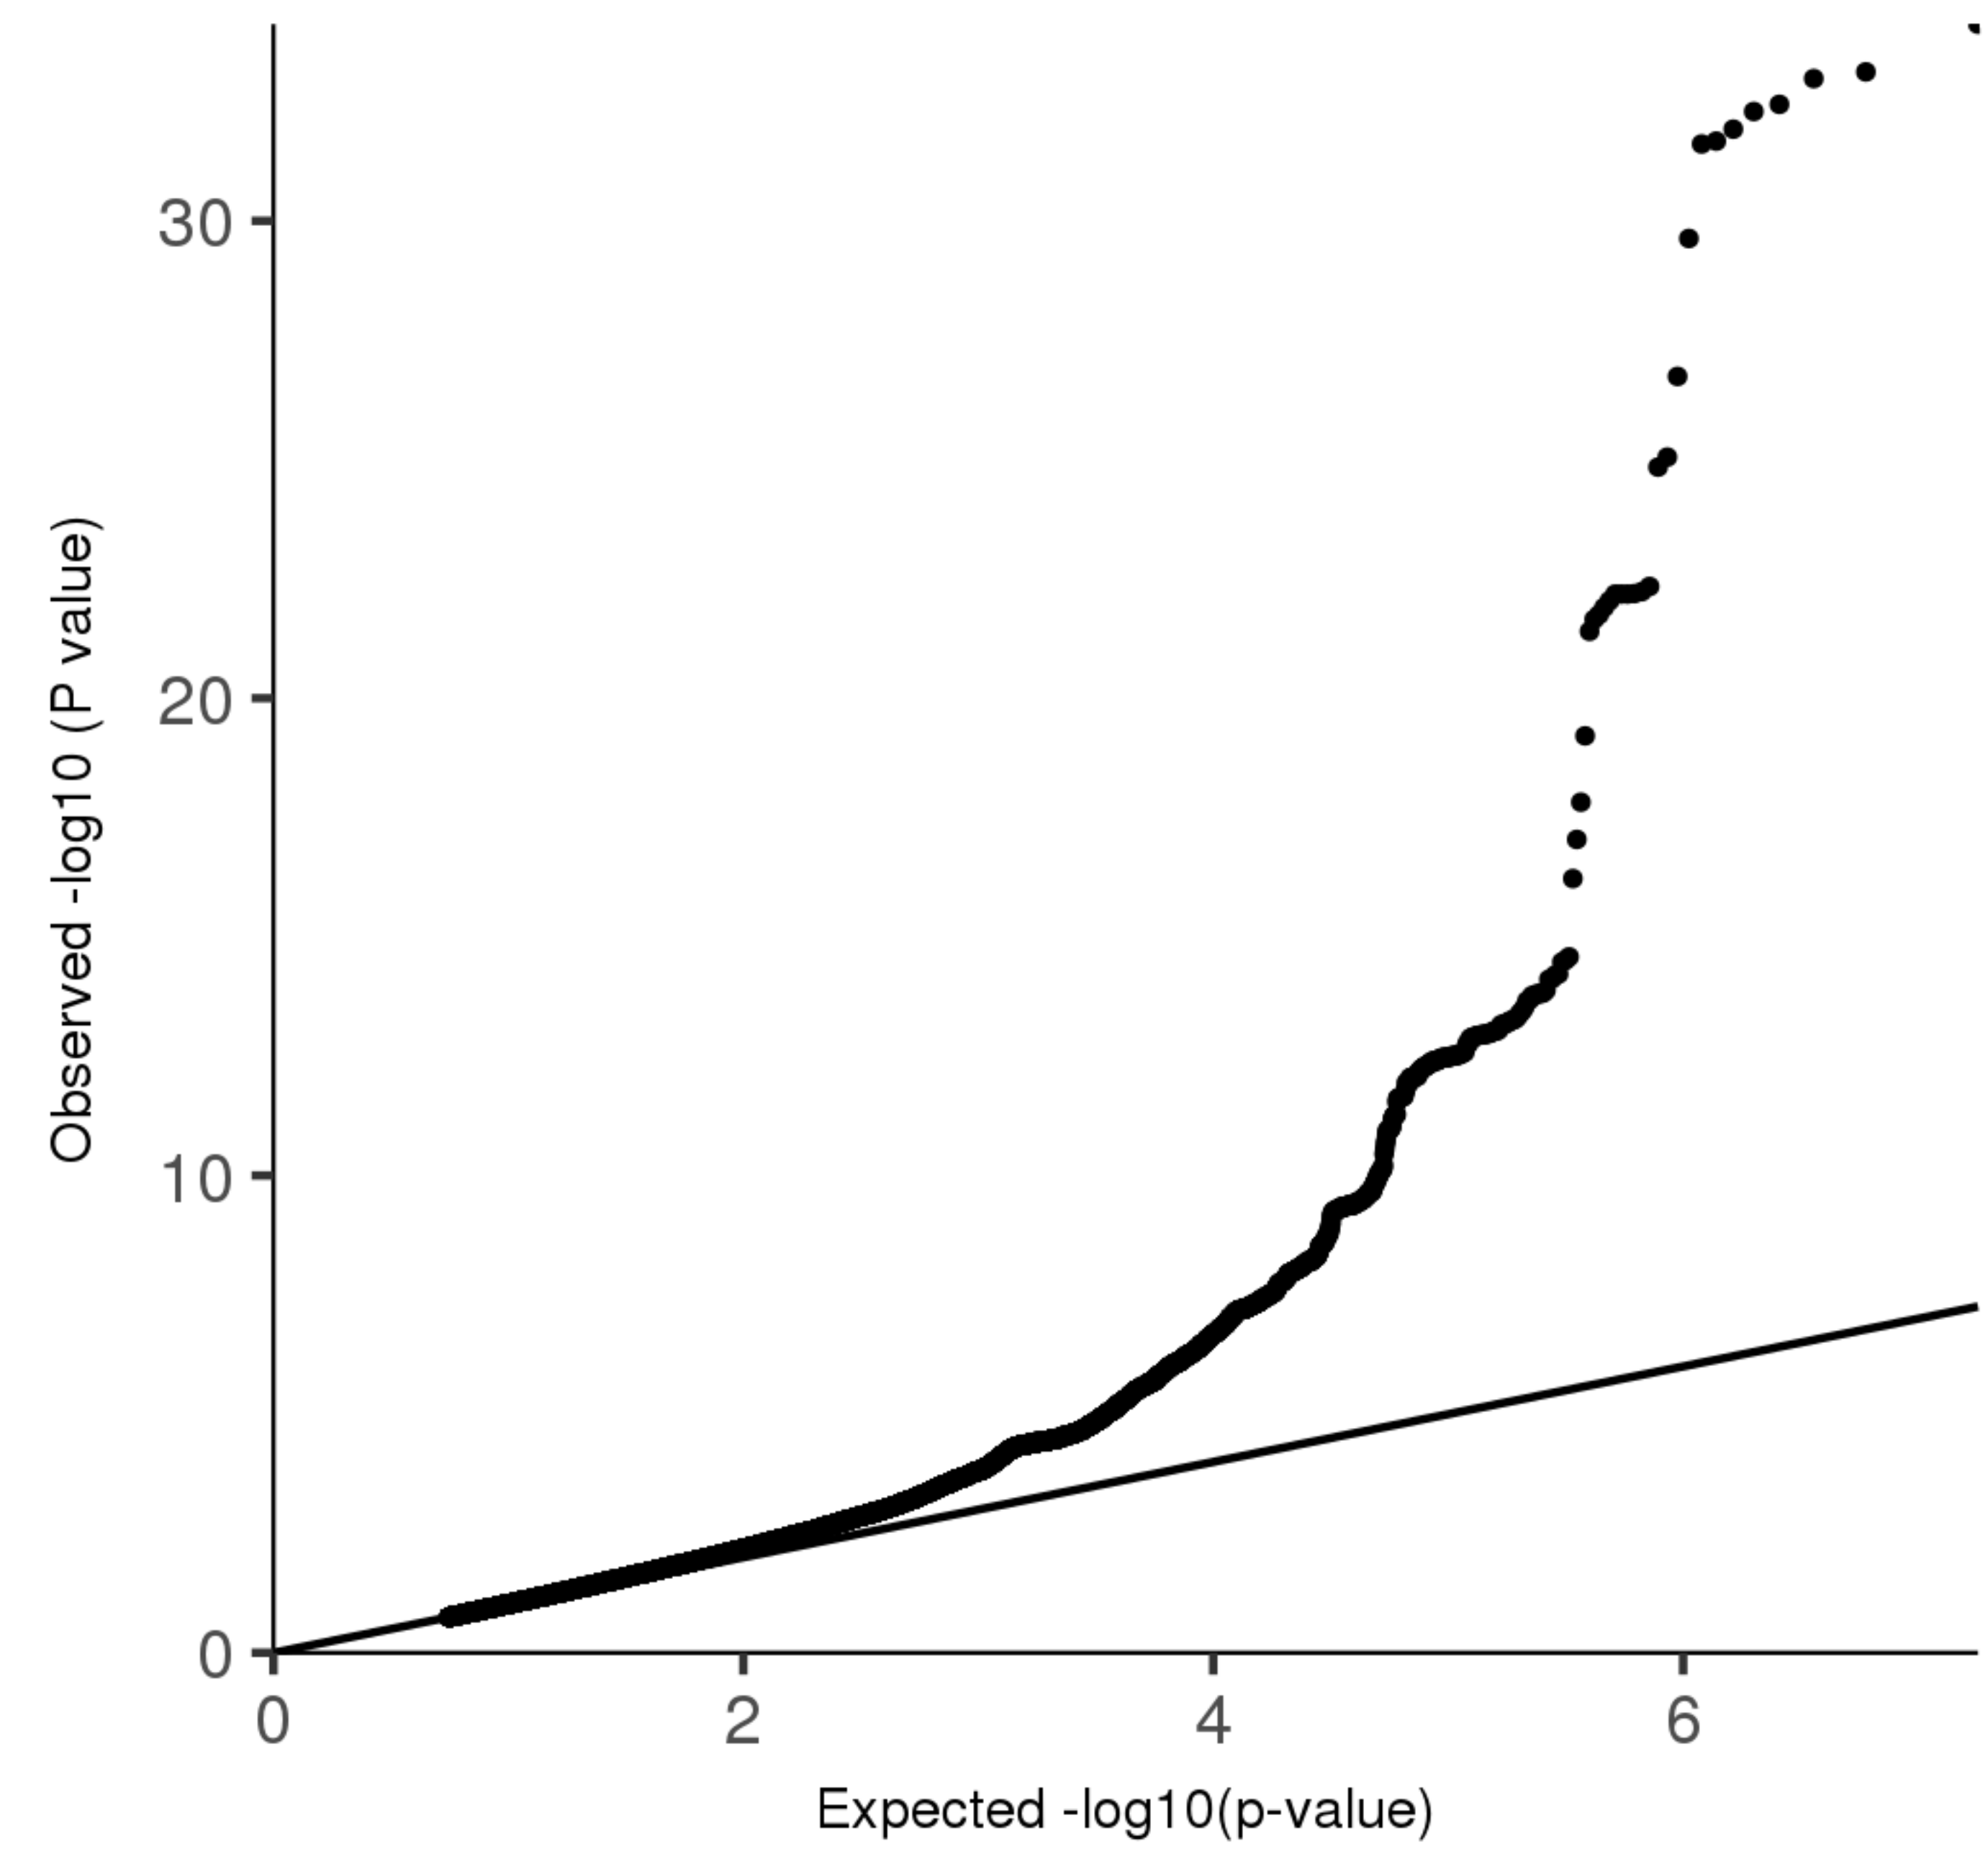

dMRI OD

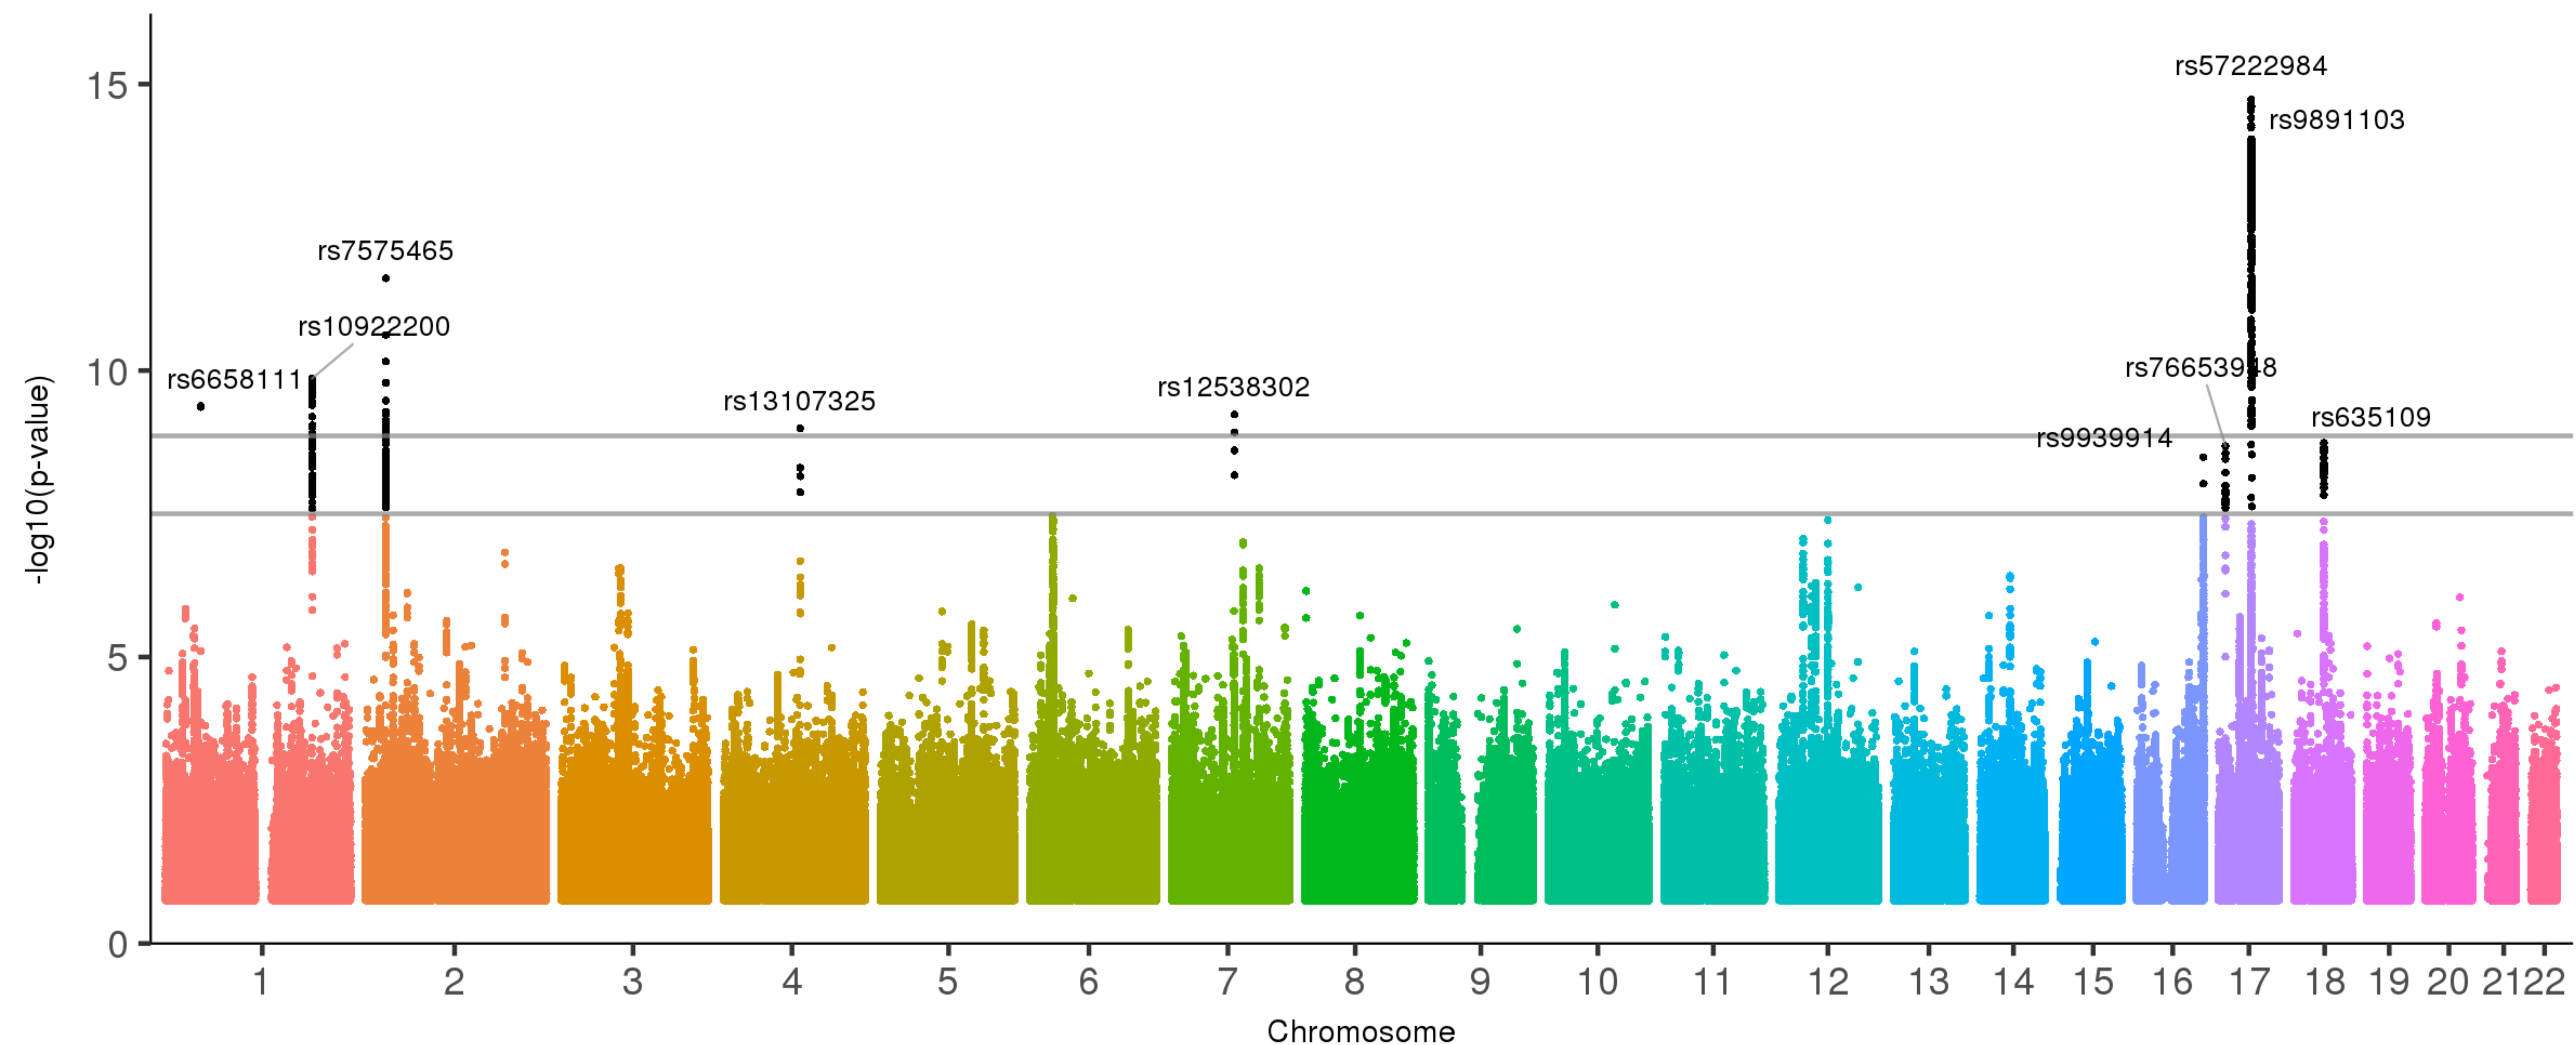

dMRI OD

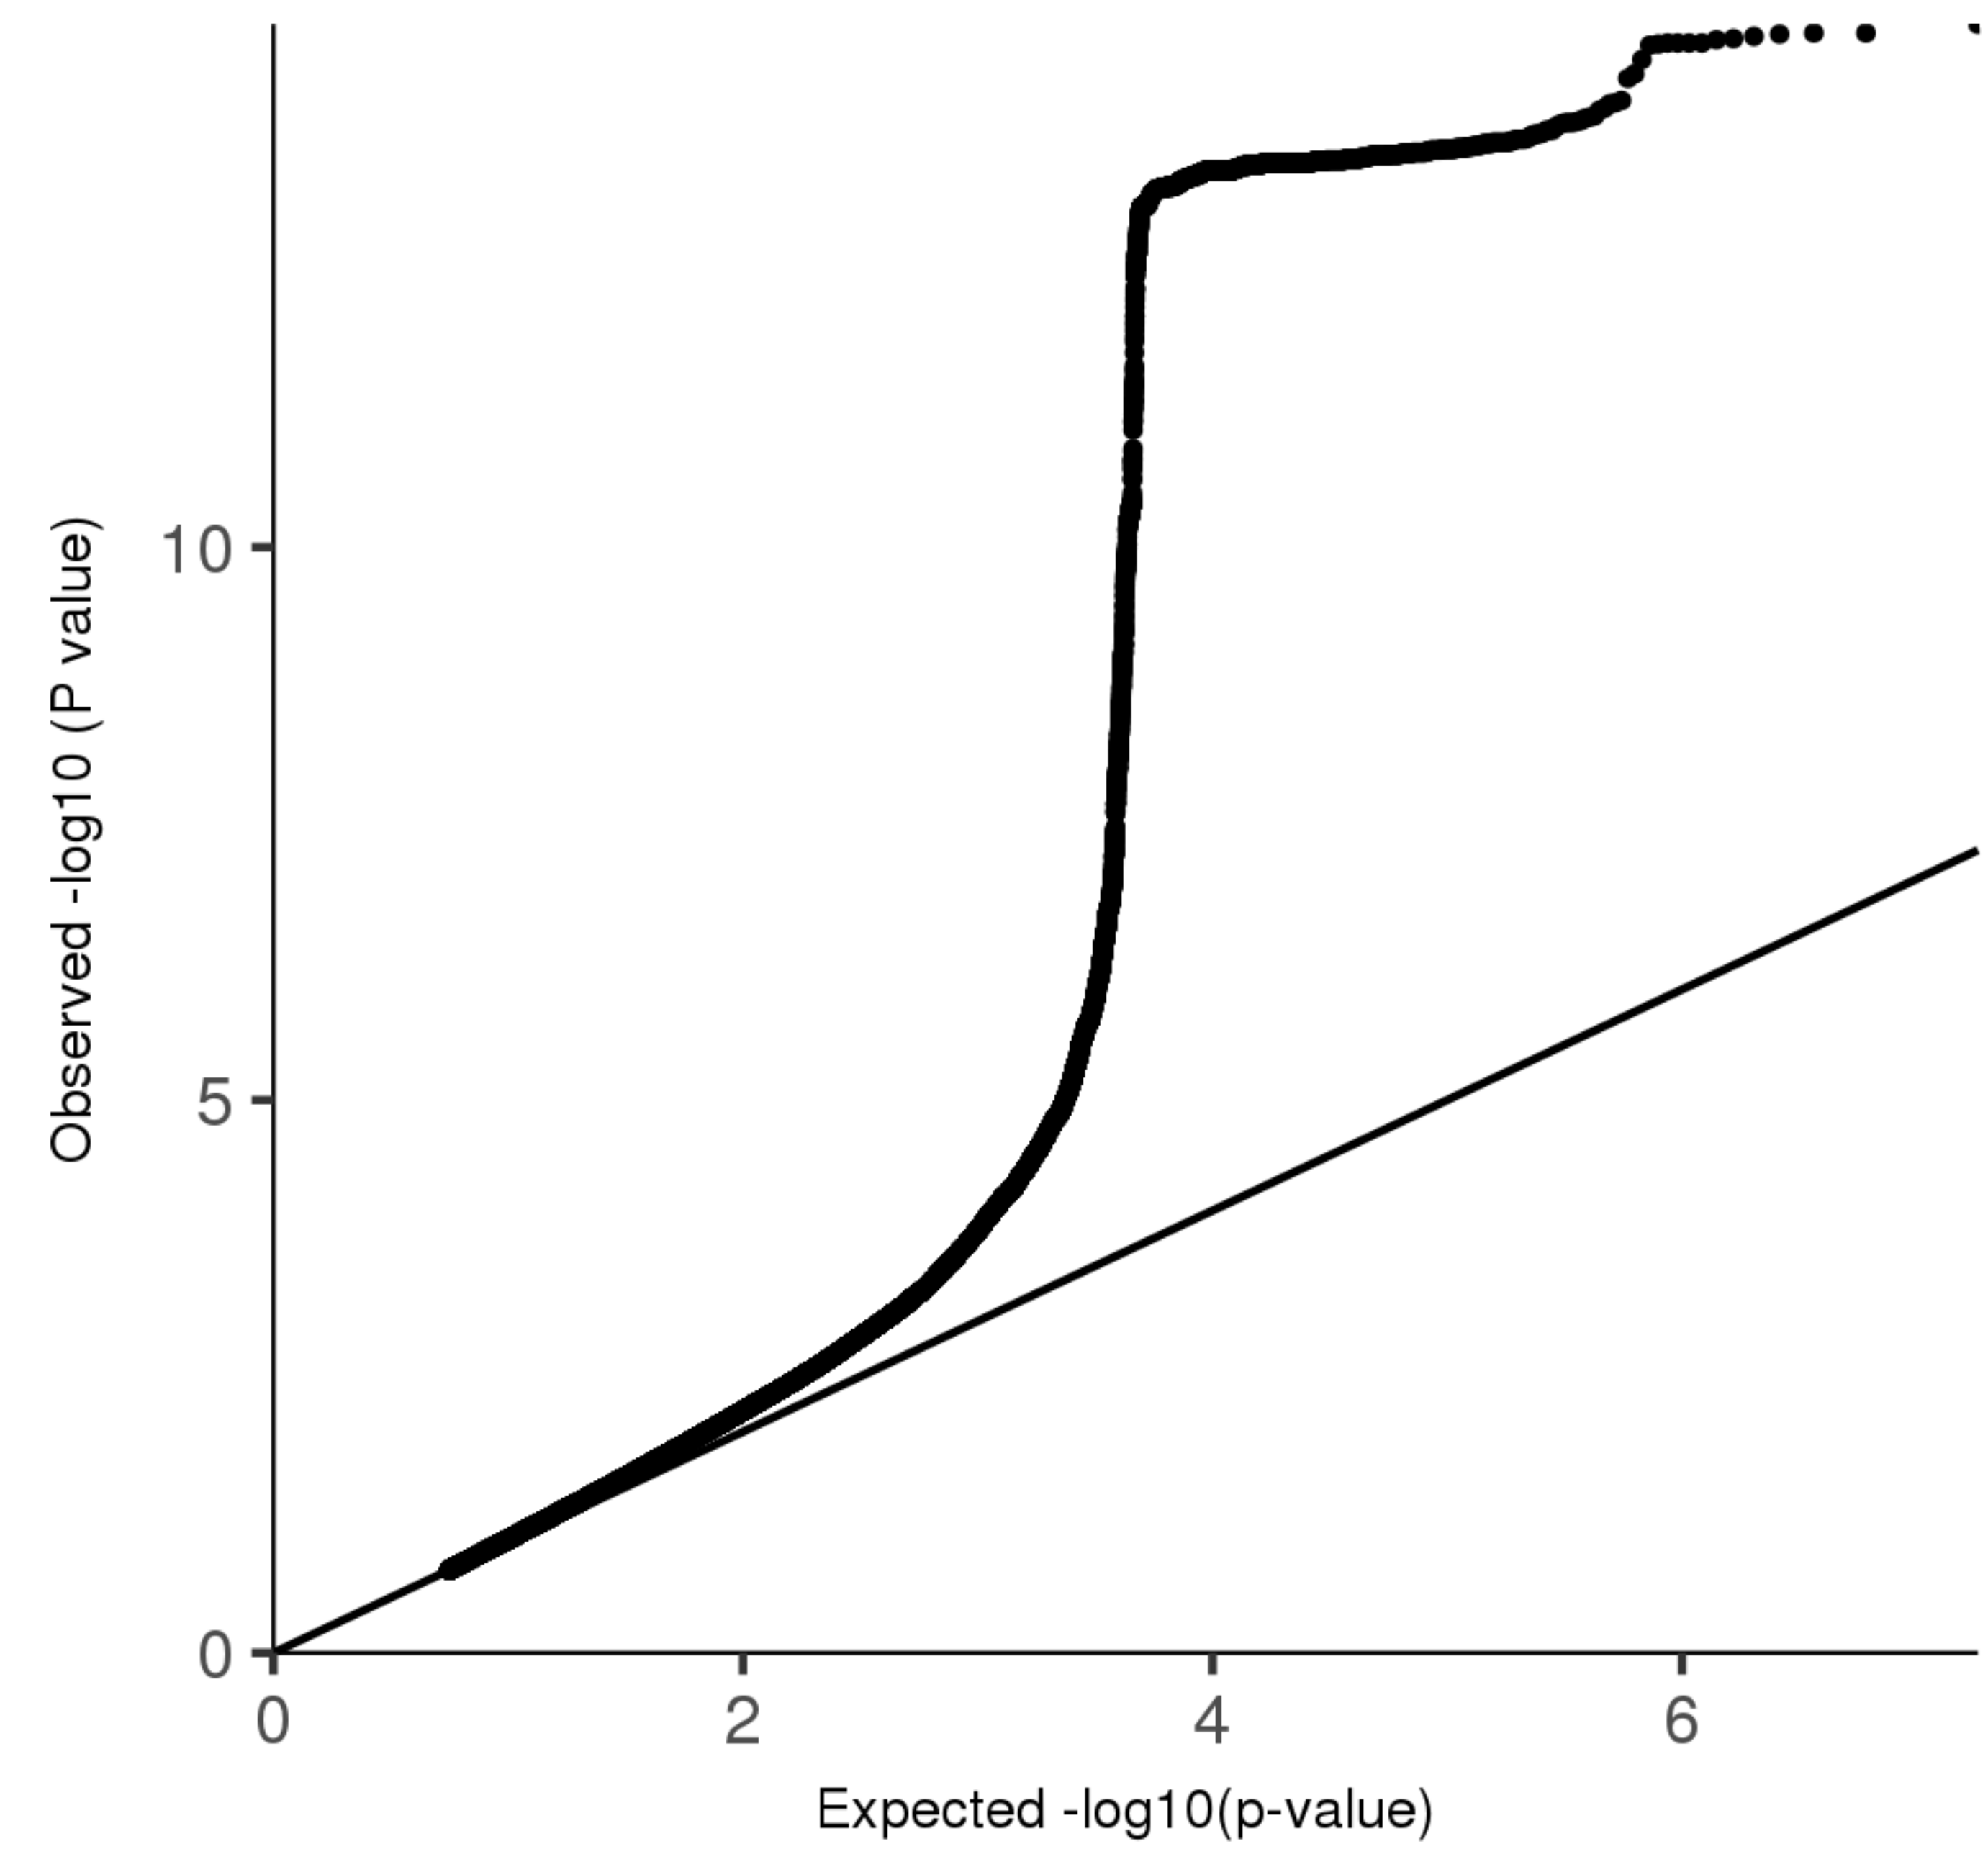

dMRI ISOVF

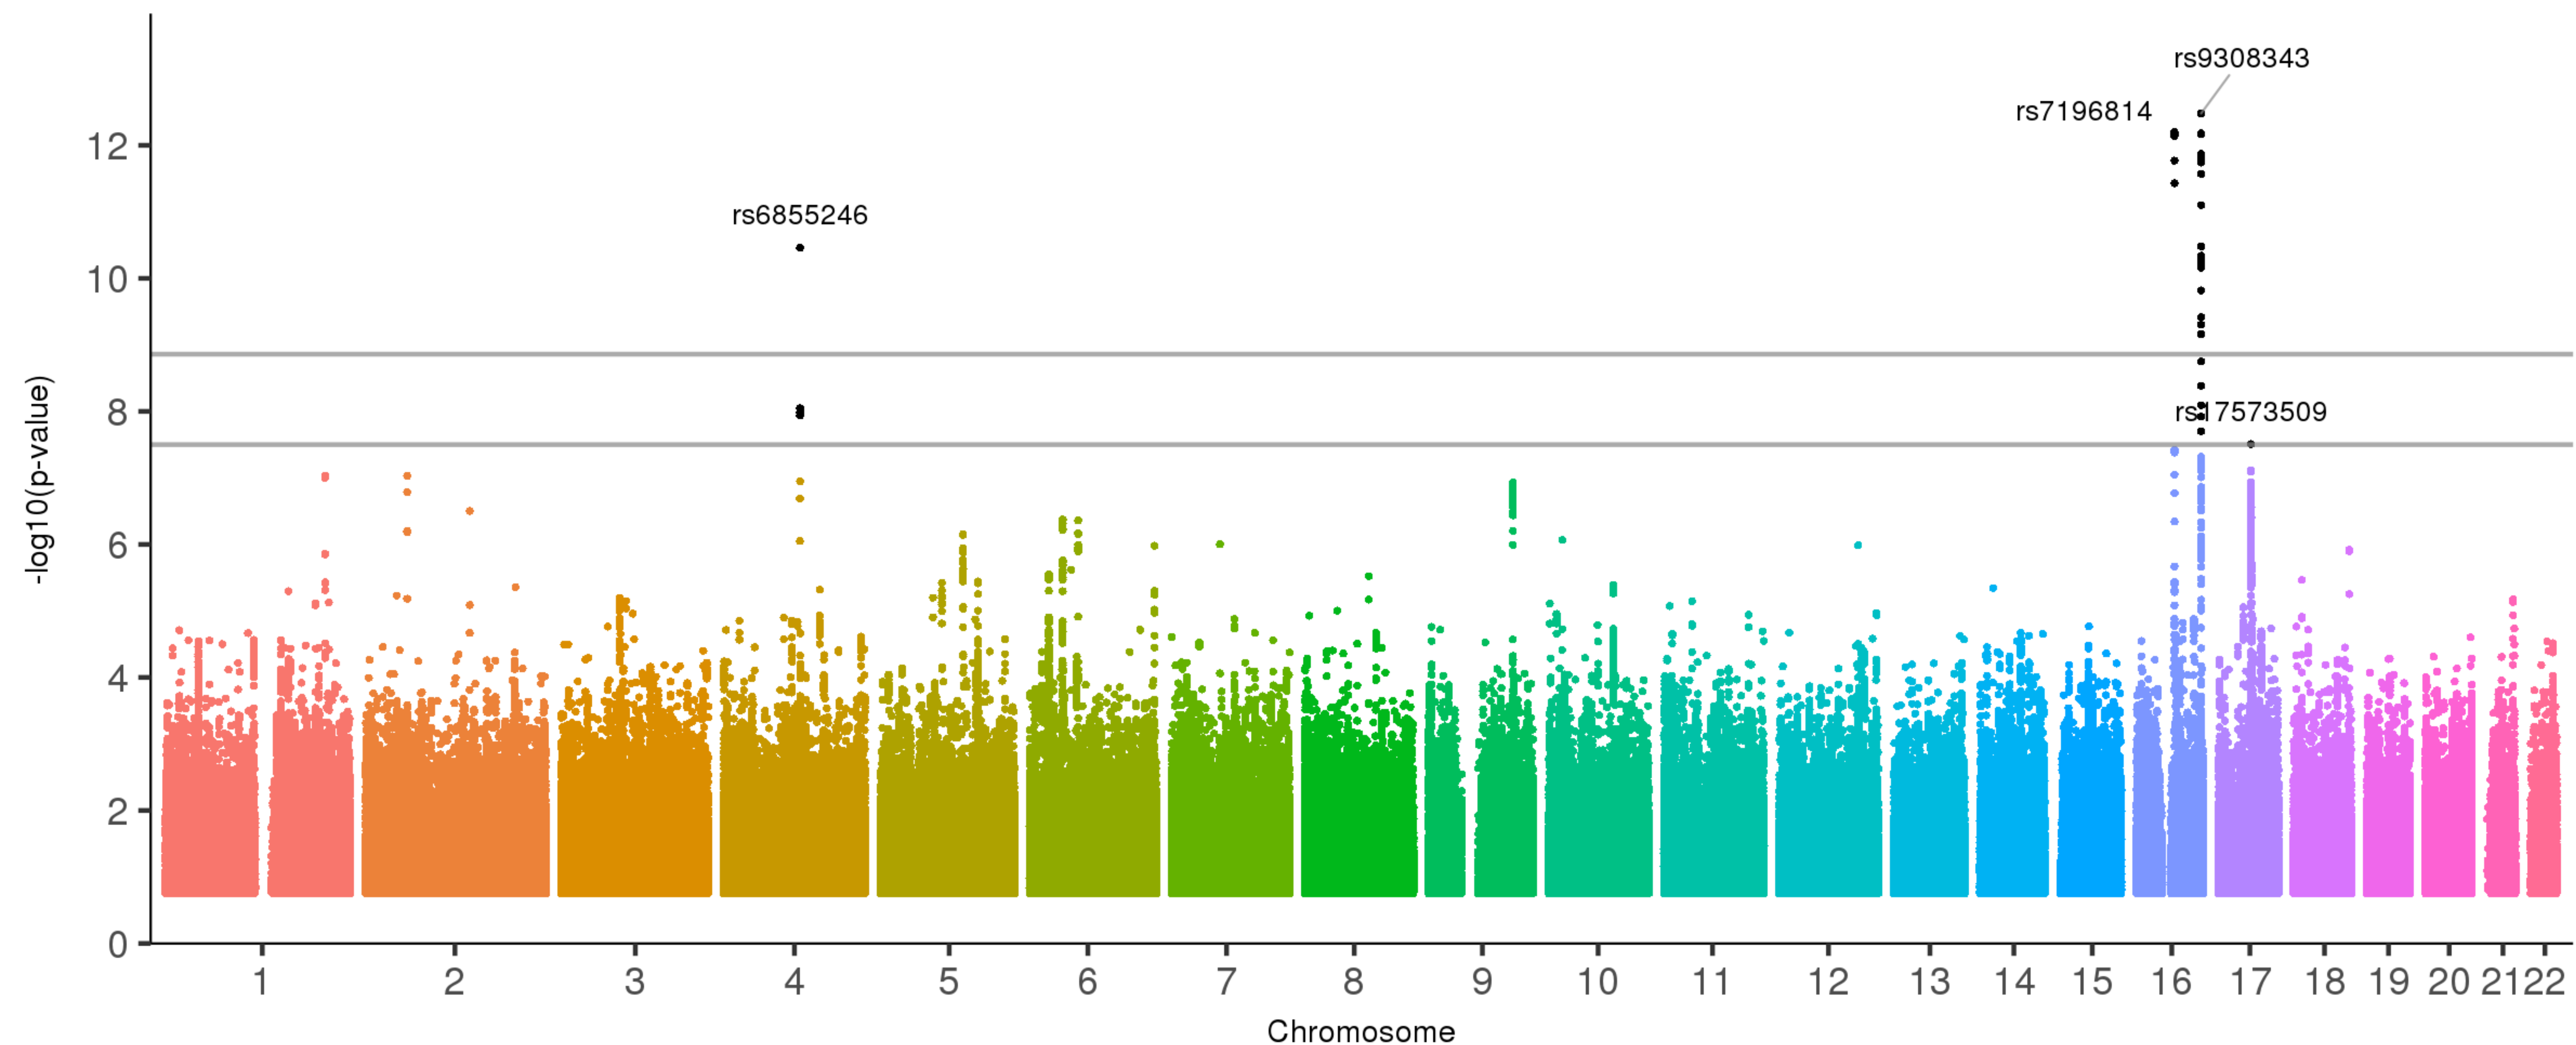

dMRI ISOVF

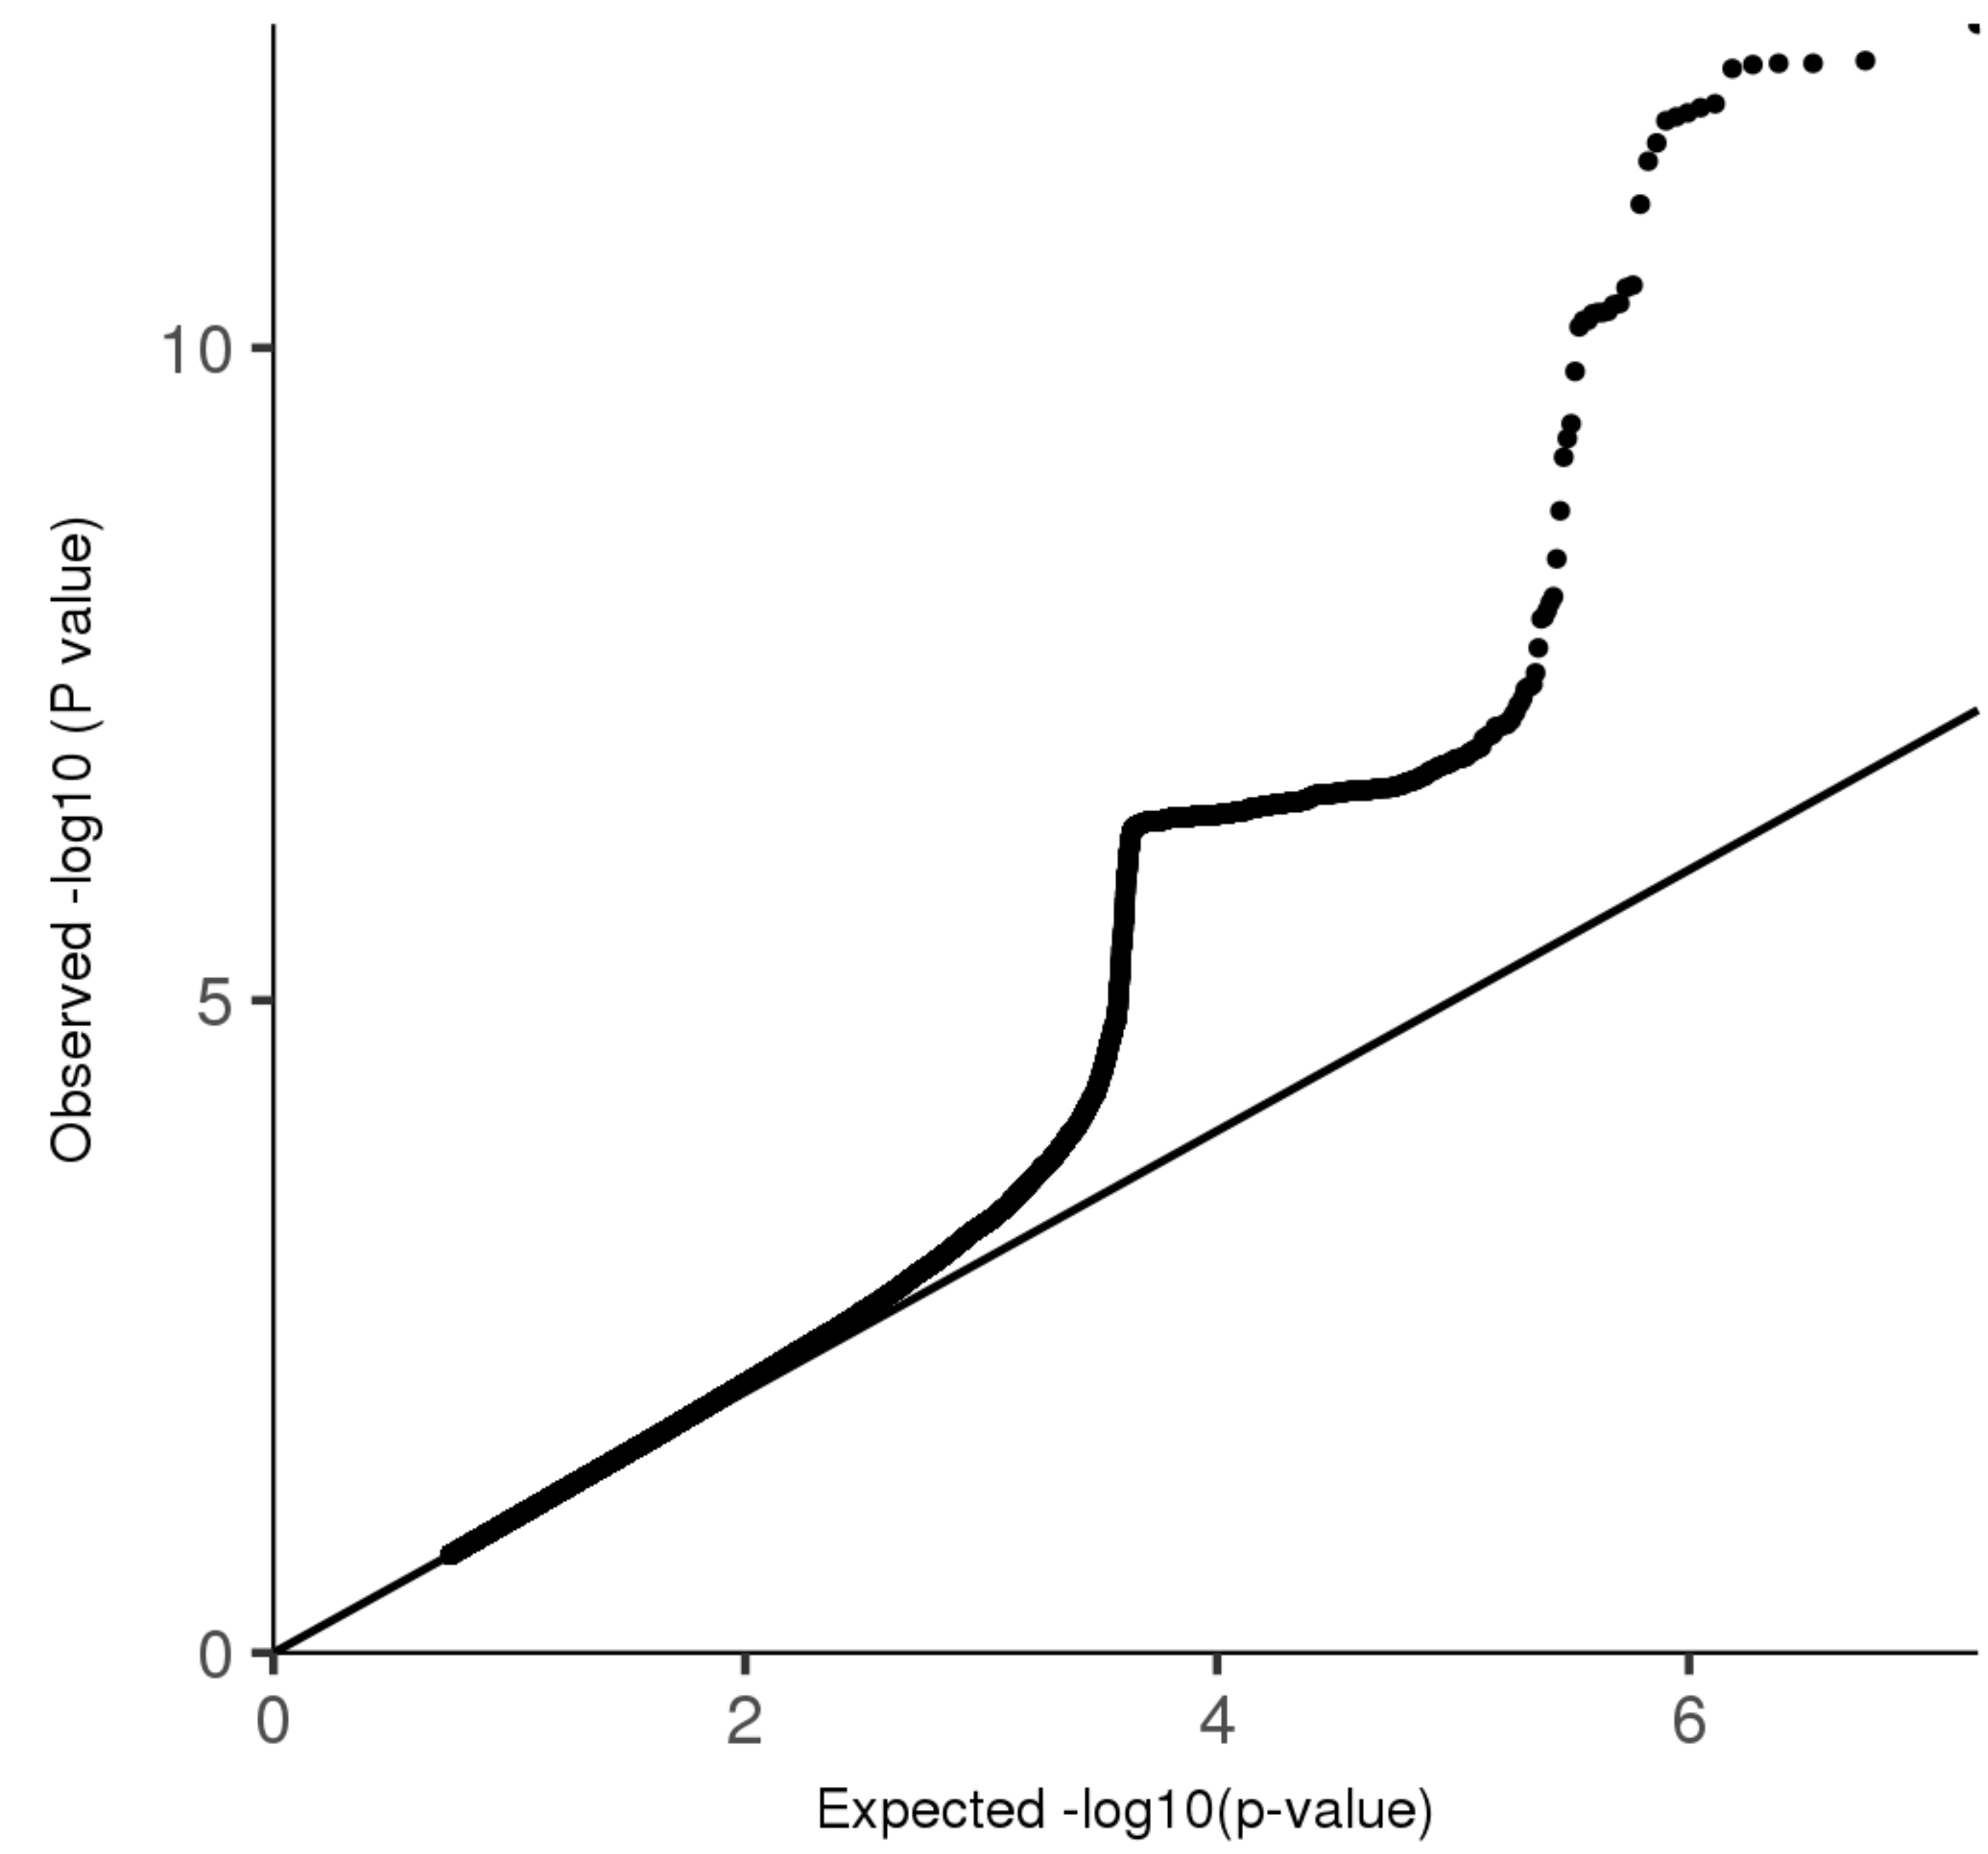

Freesurfer volume

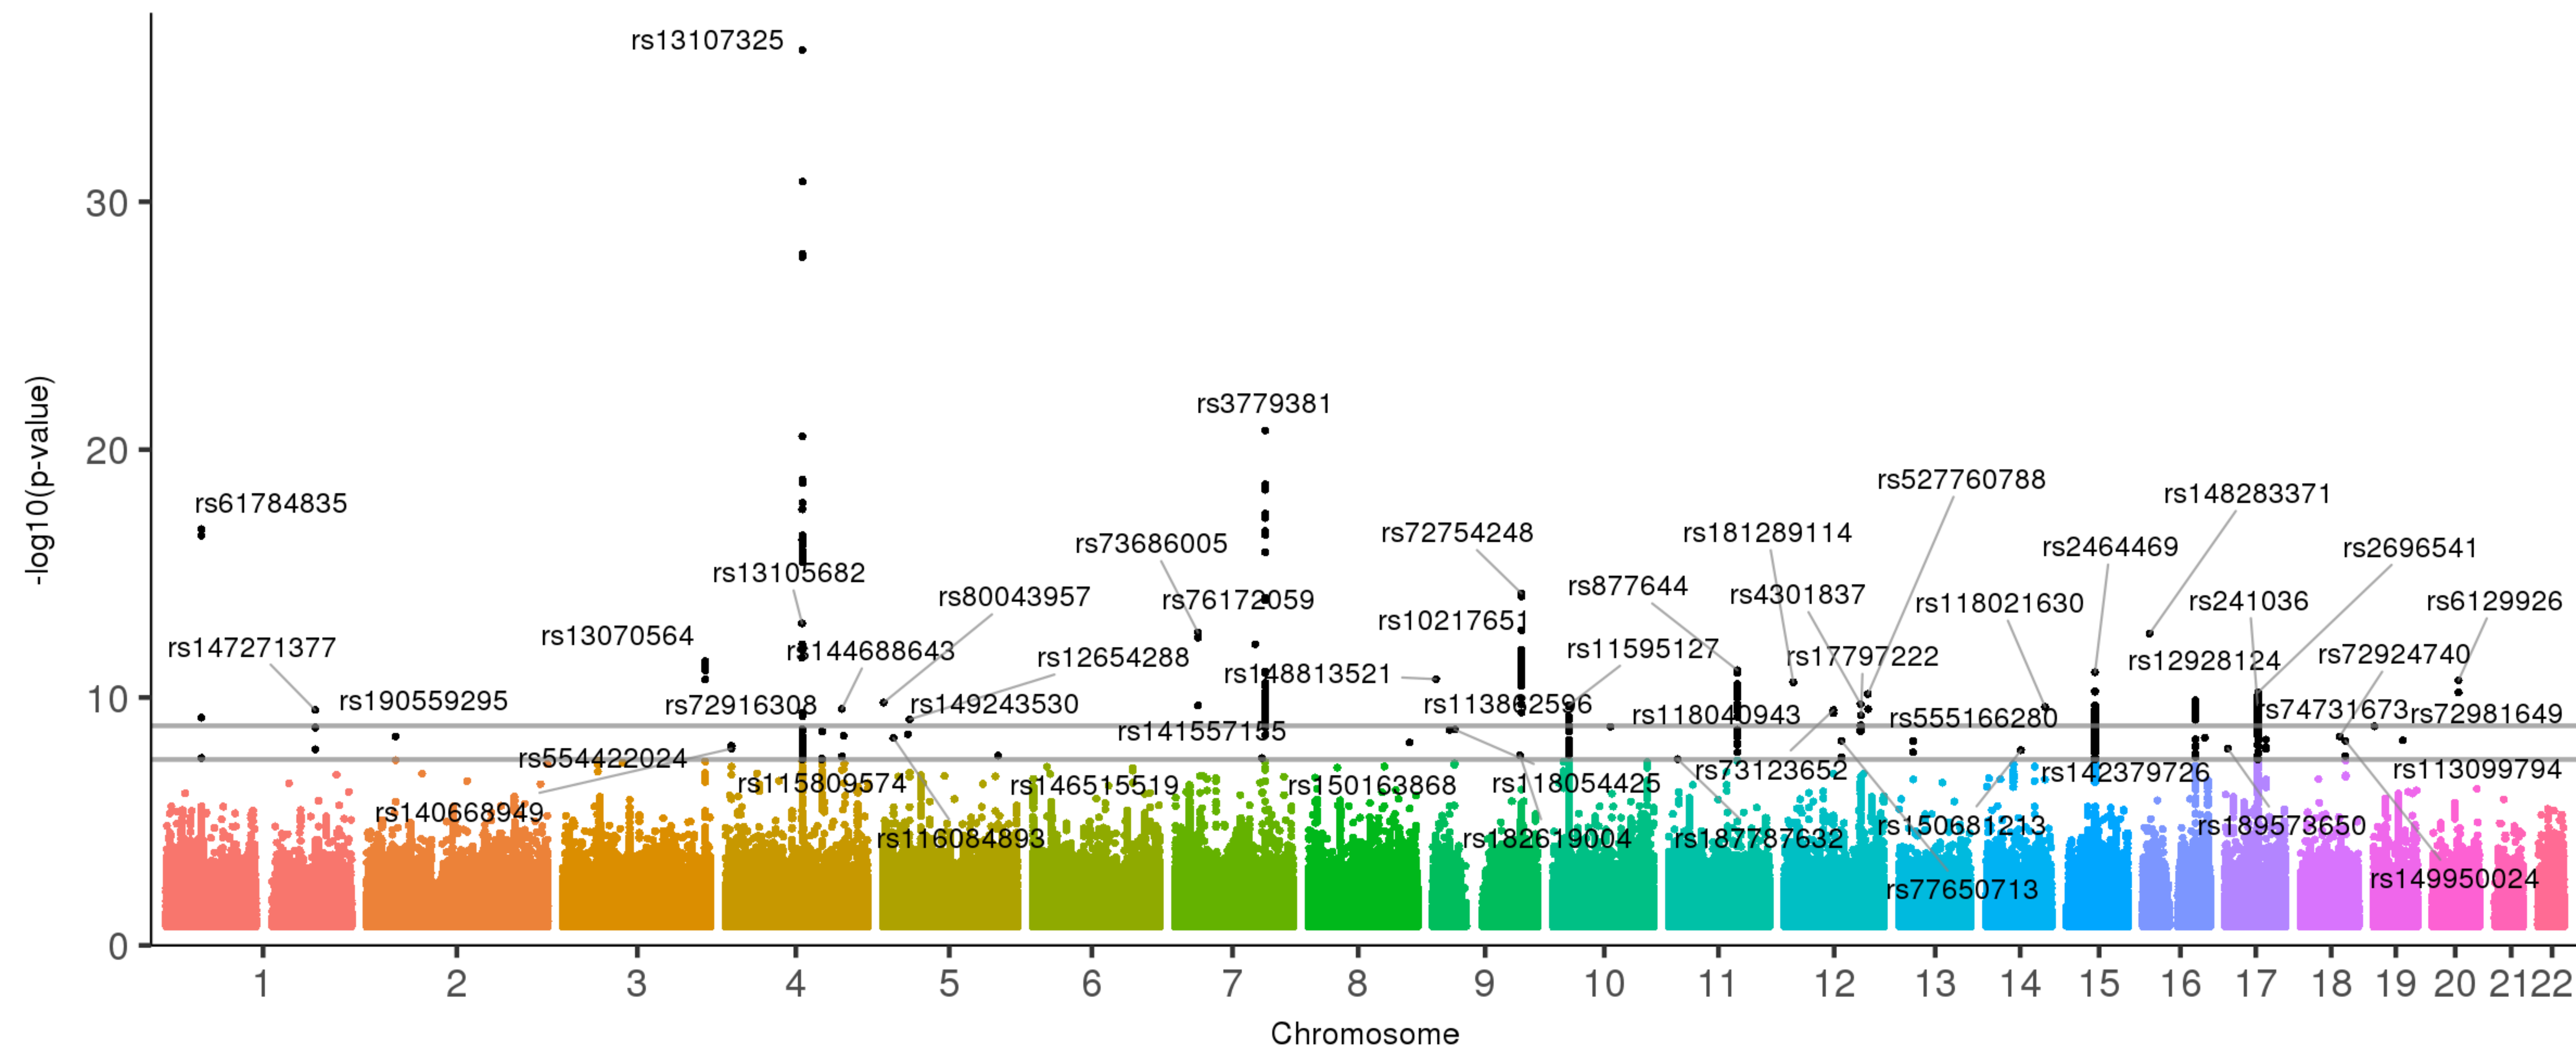

Freesurfer volume

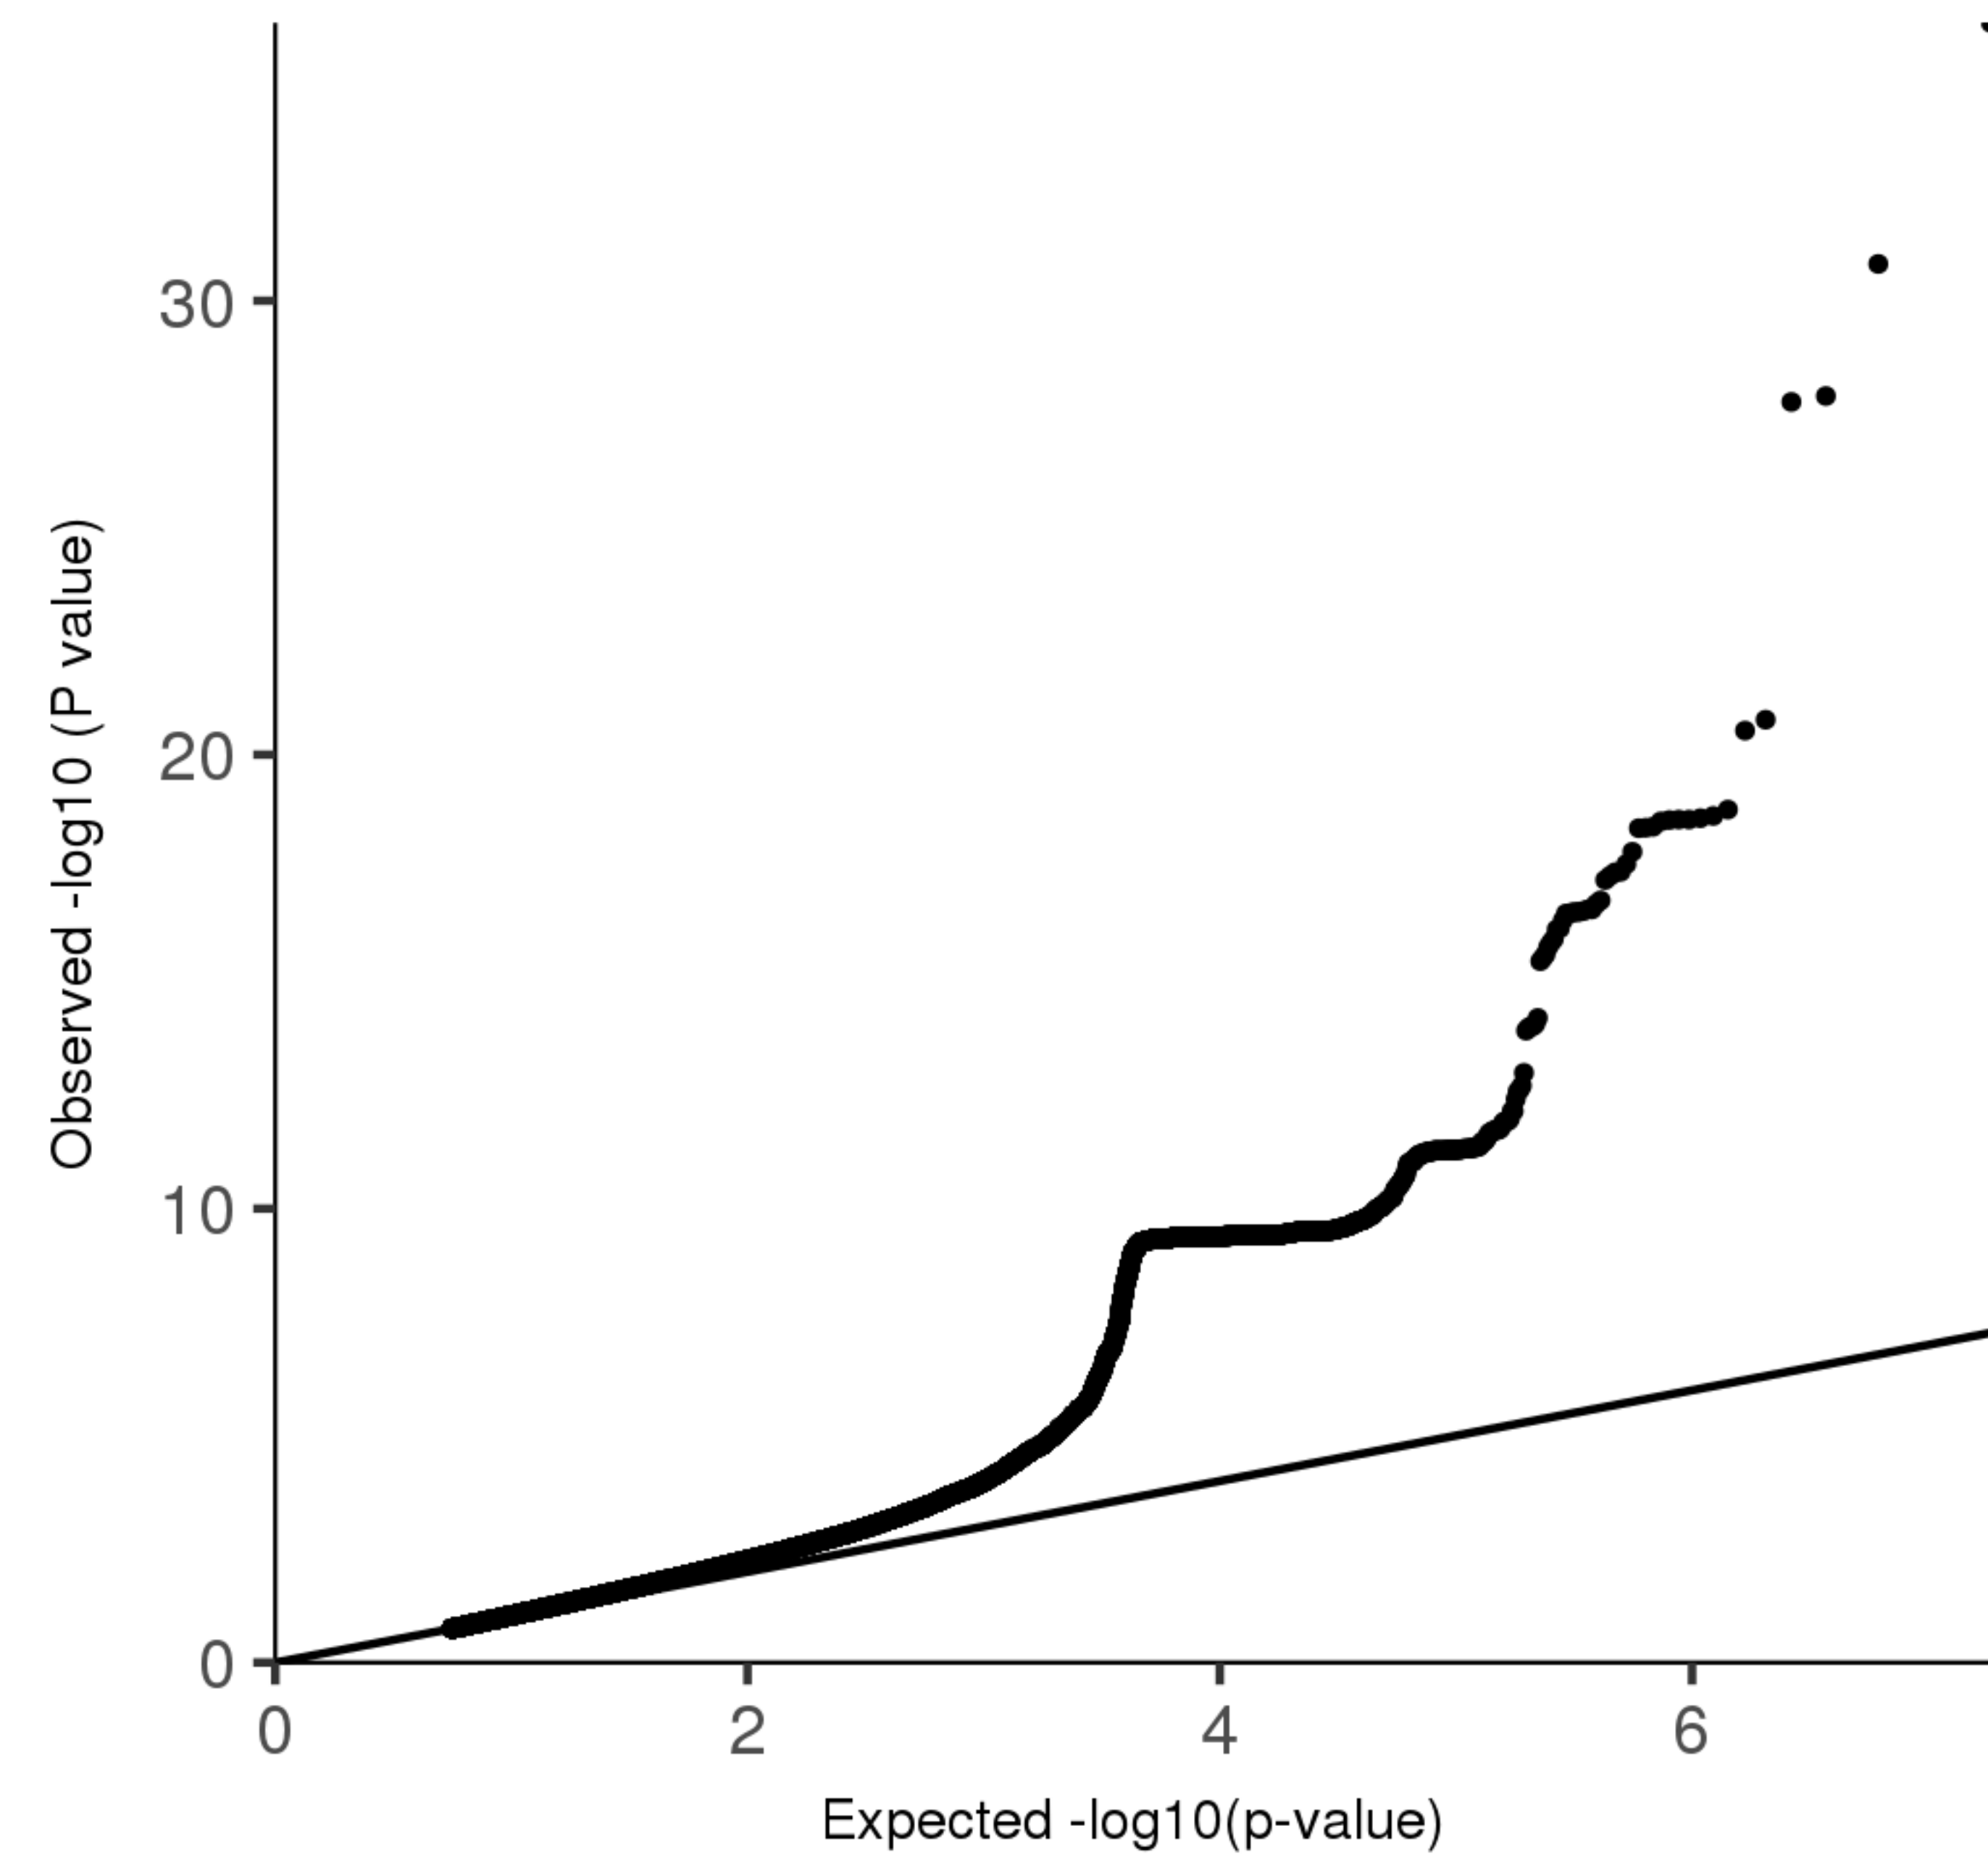

Freesurfer area

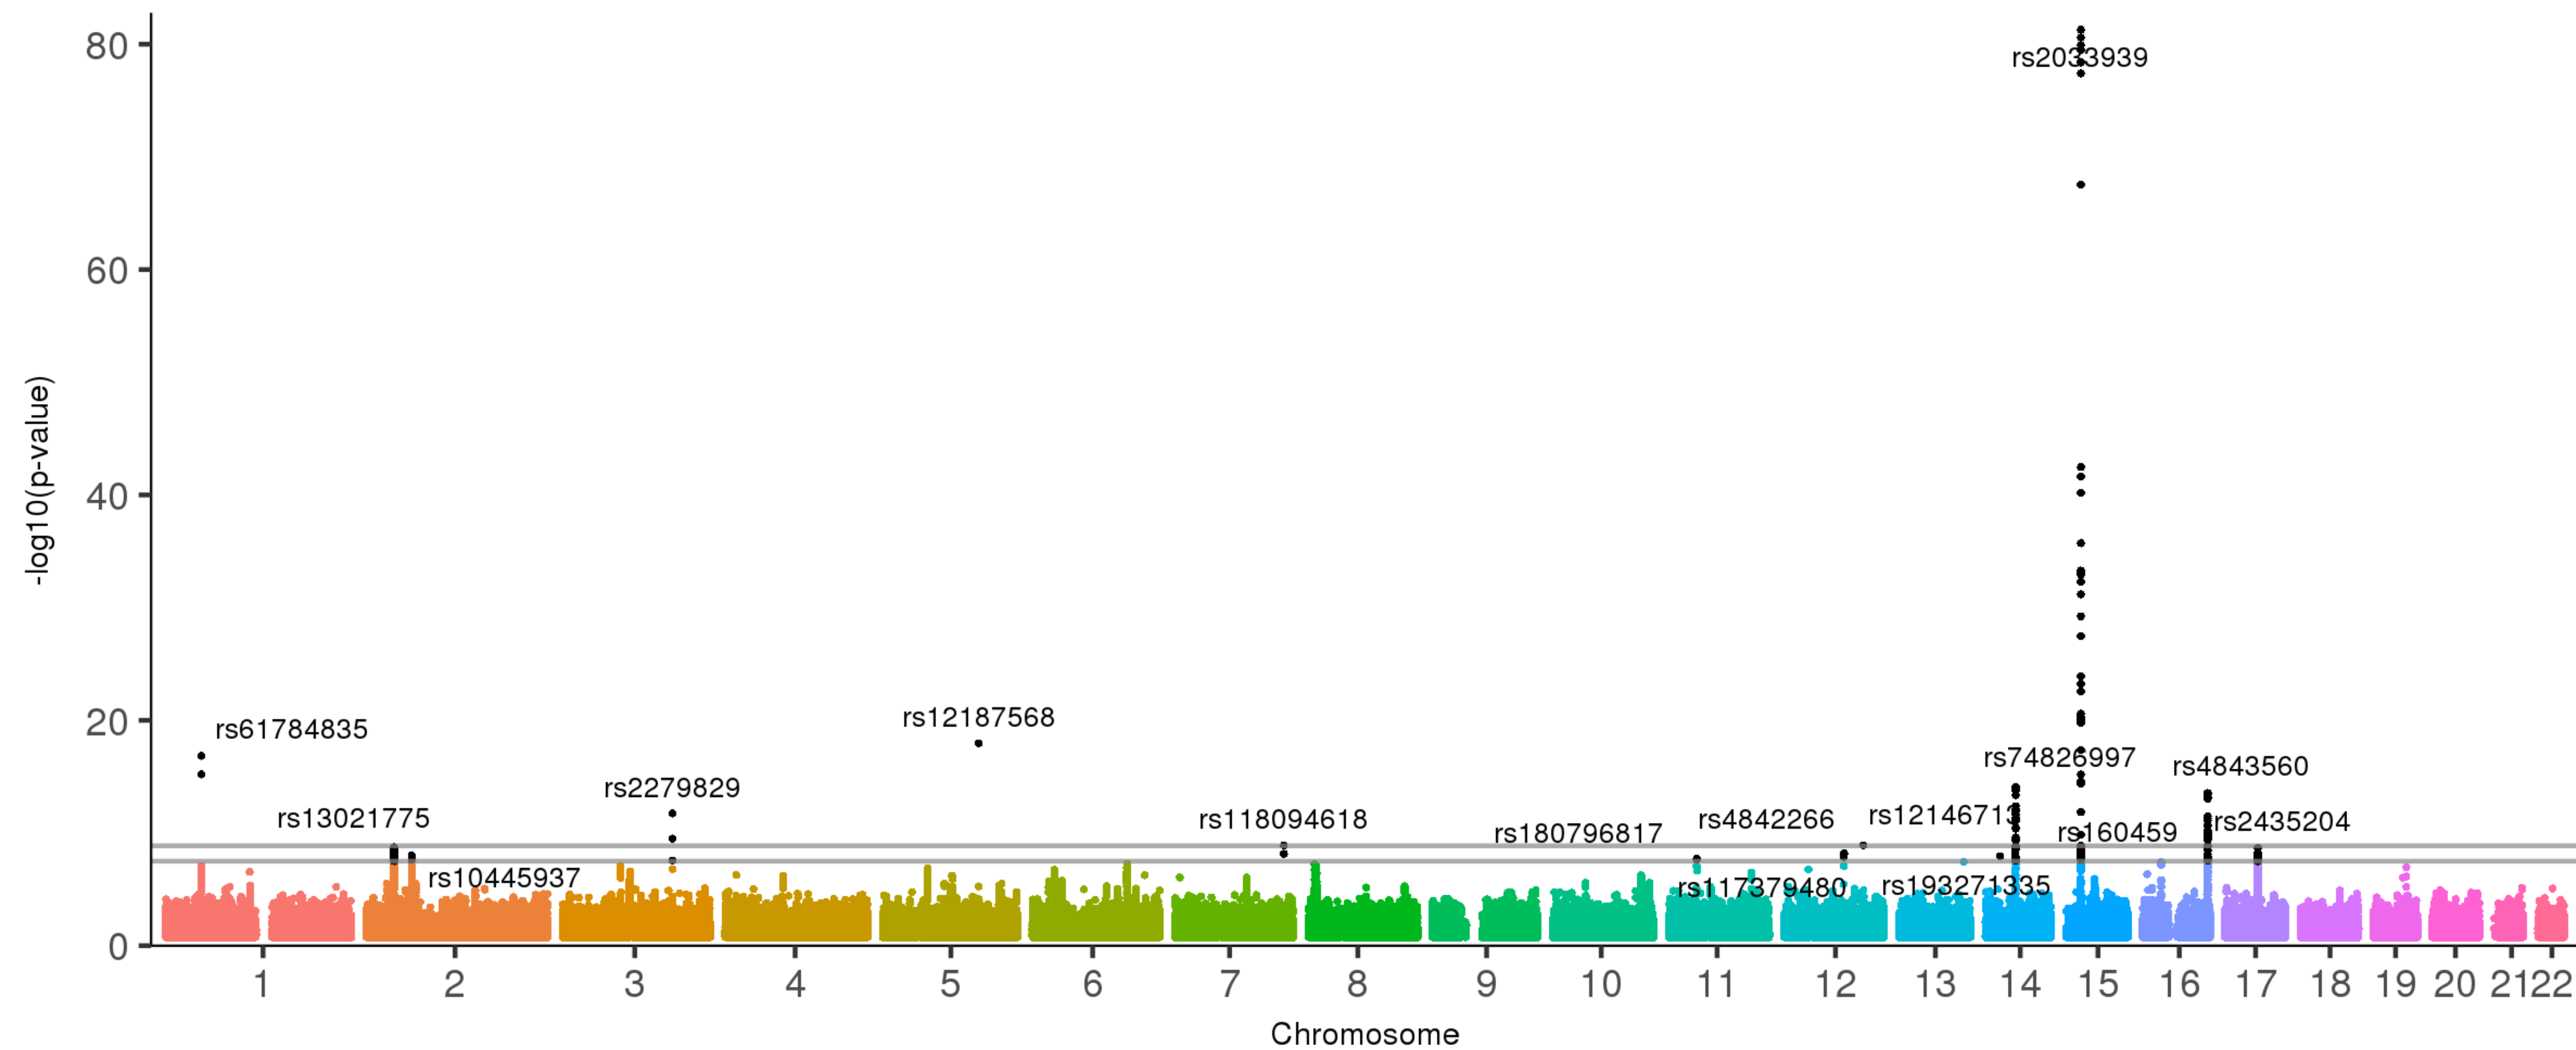

Freesurfer area

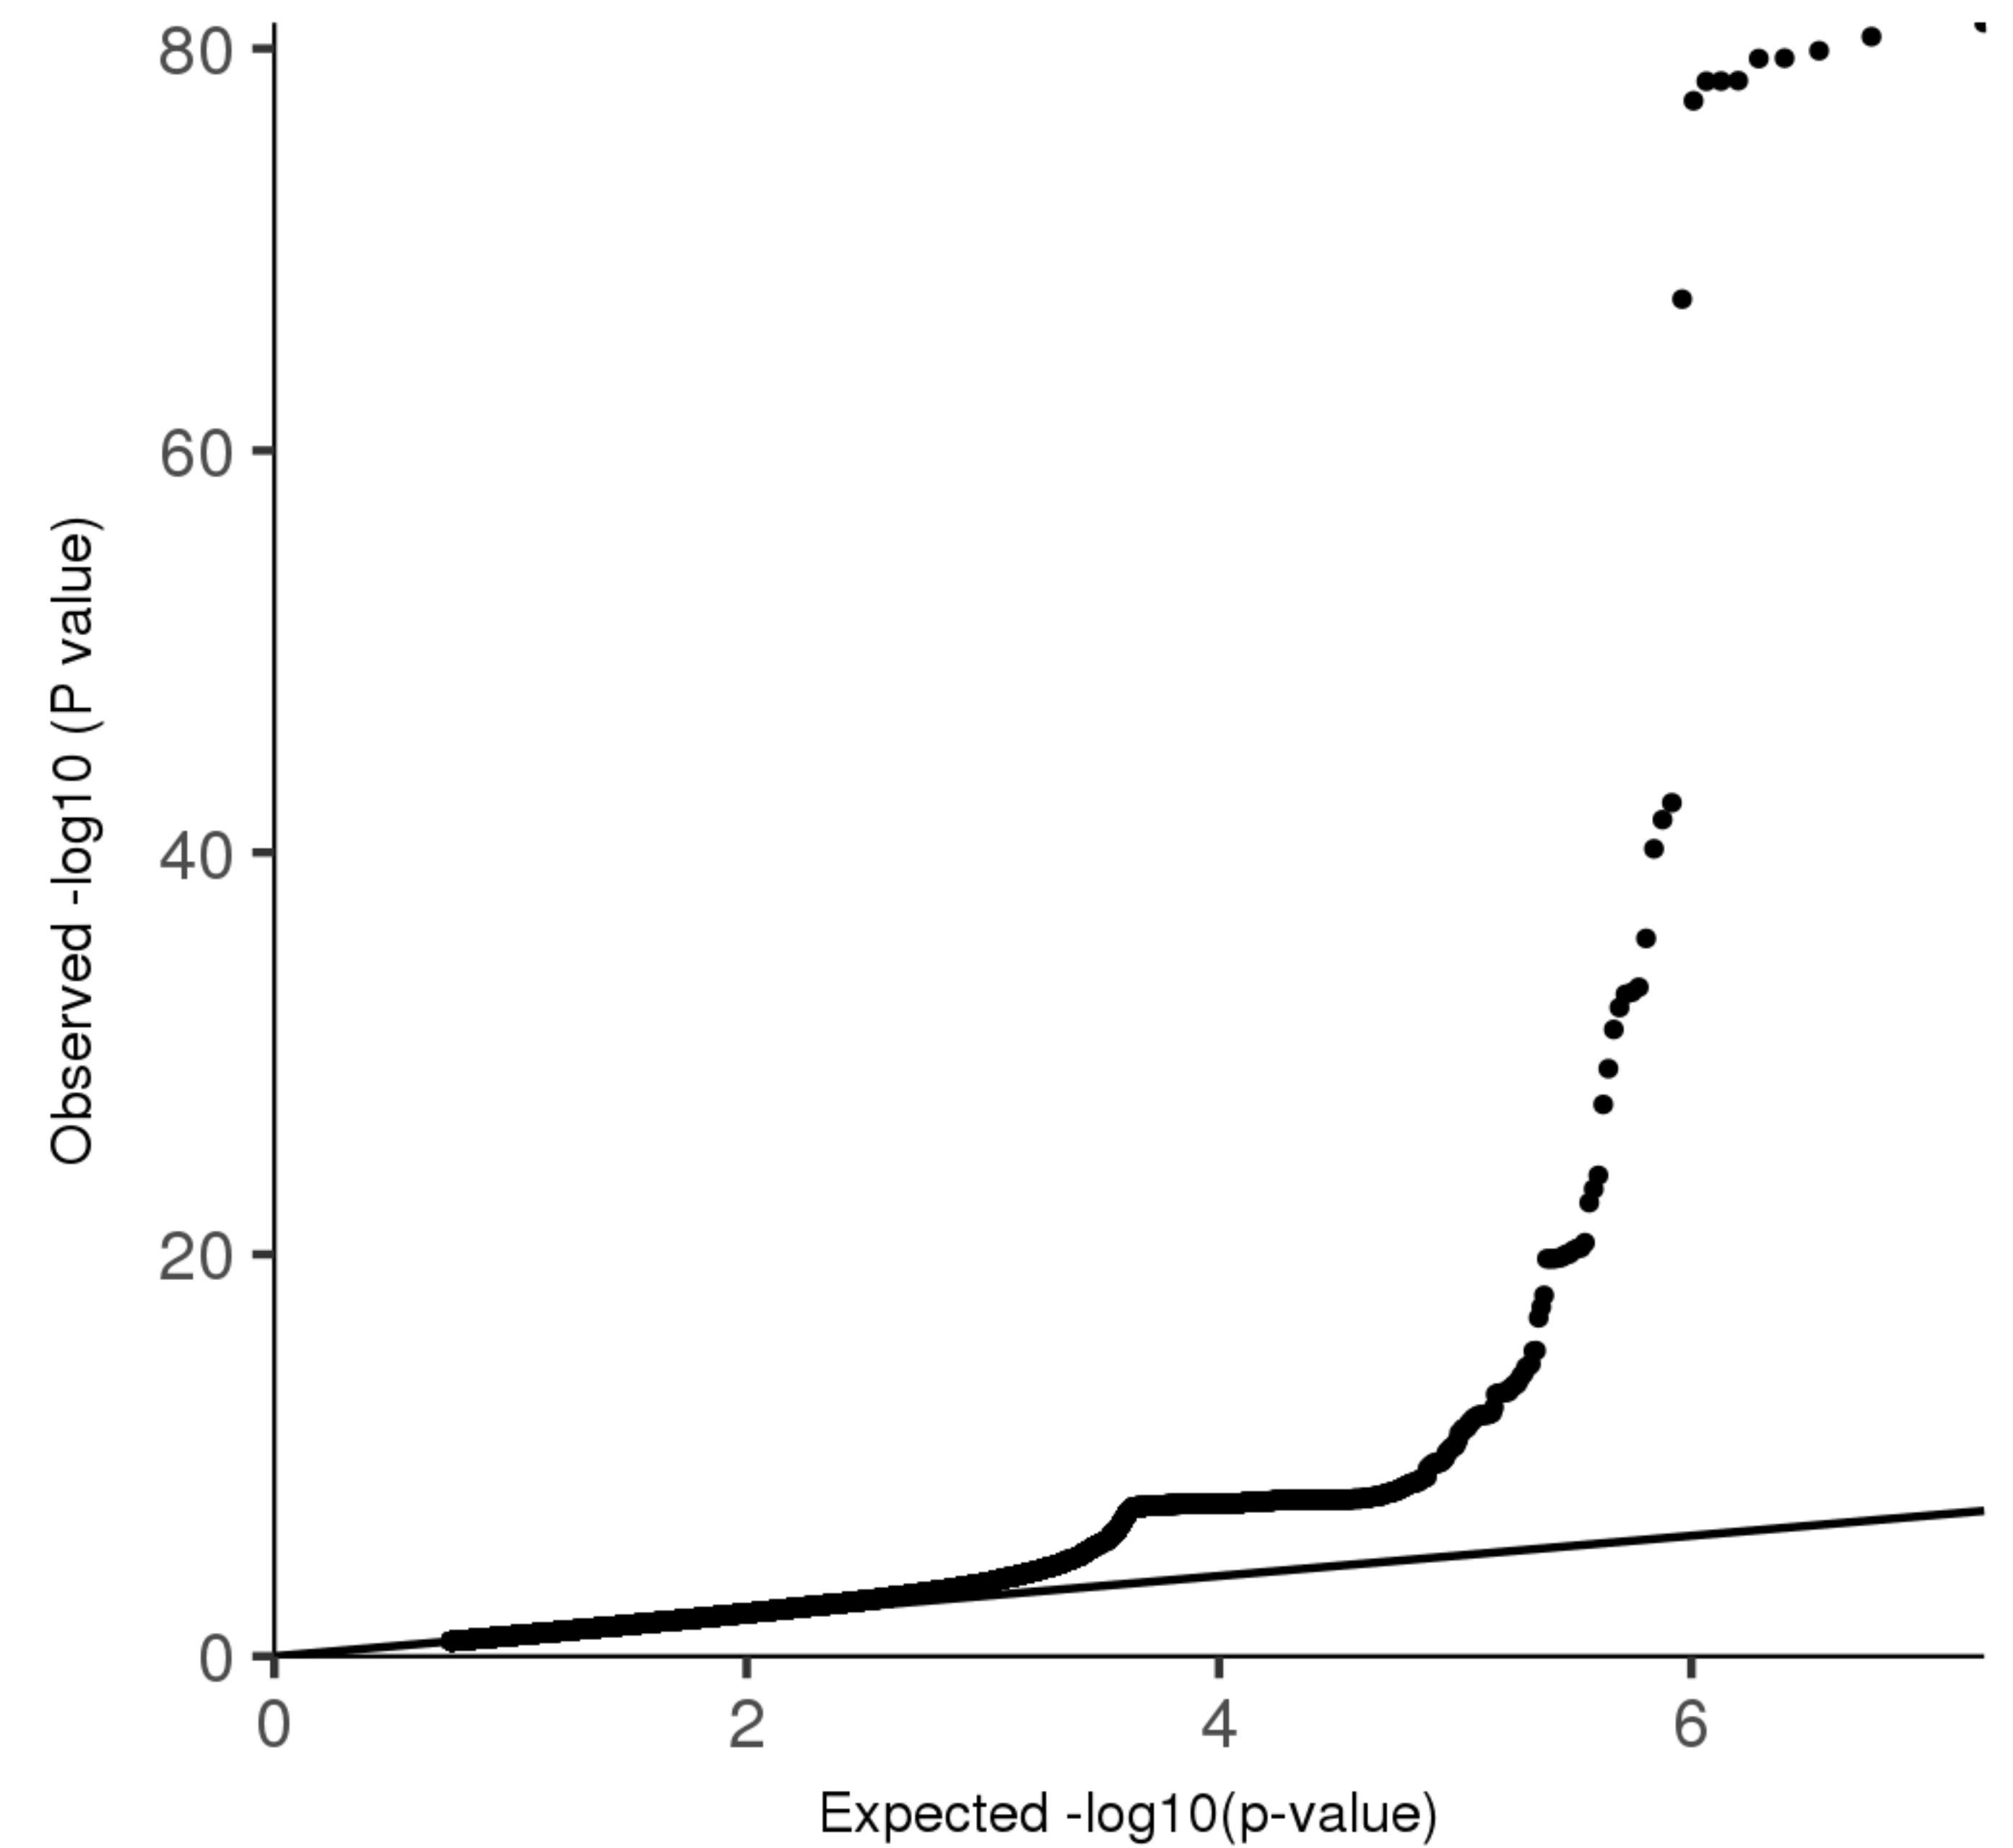

Freesurfer thickness

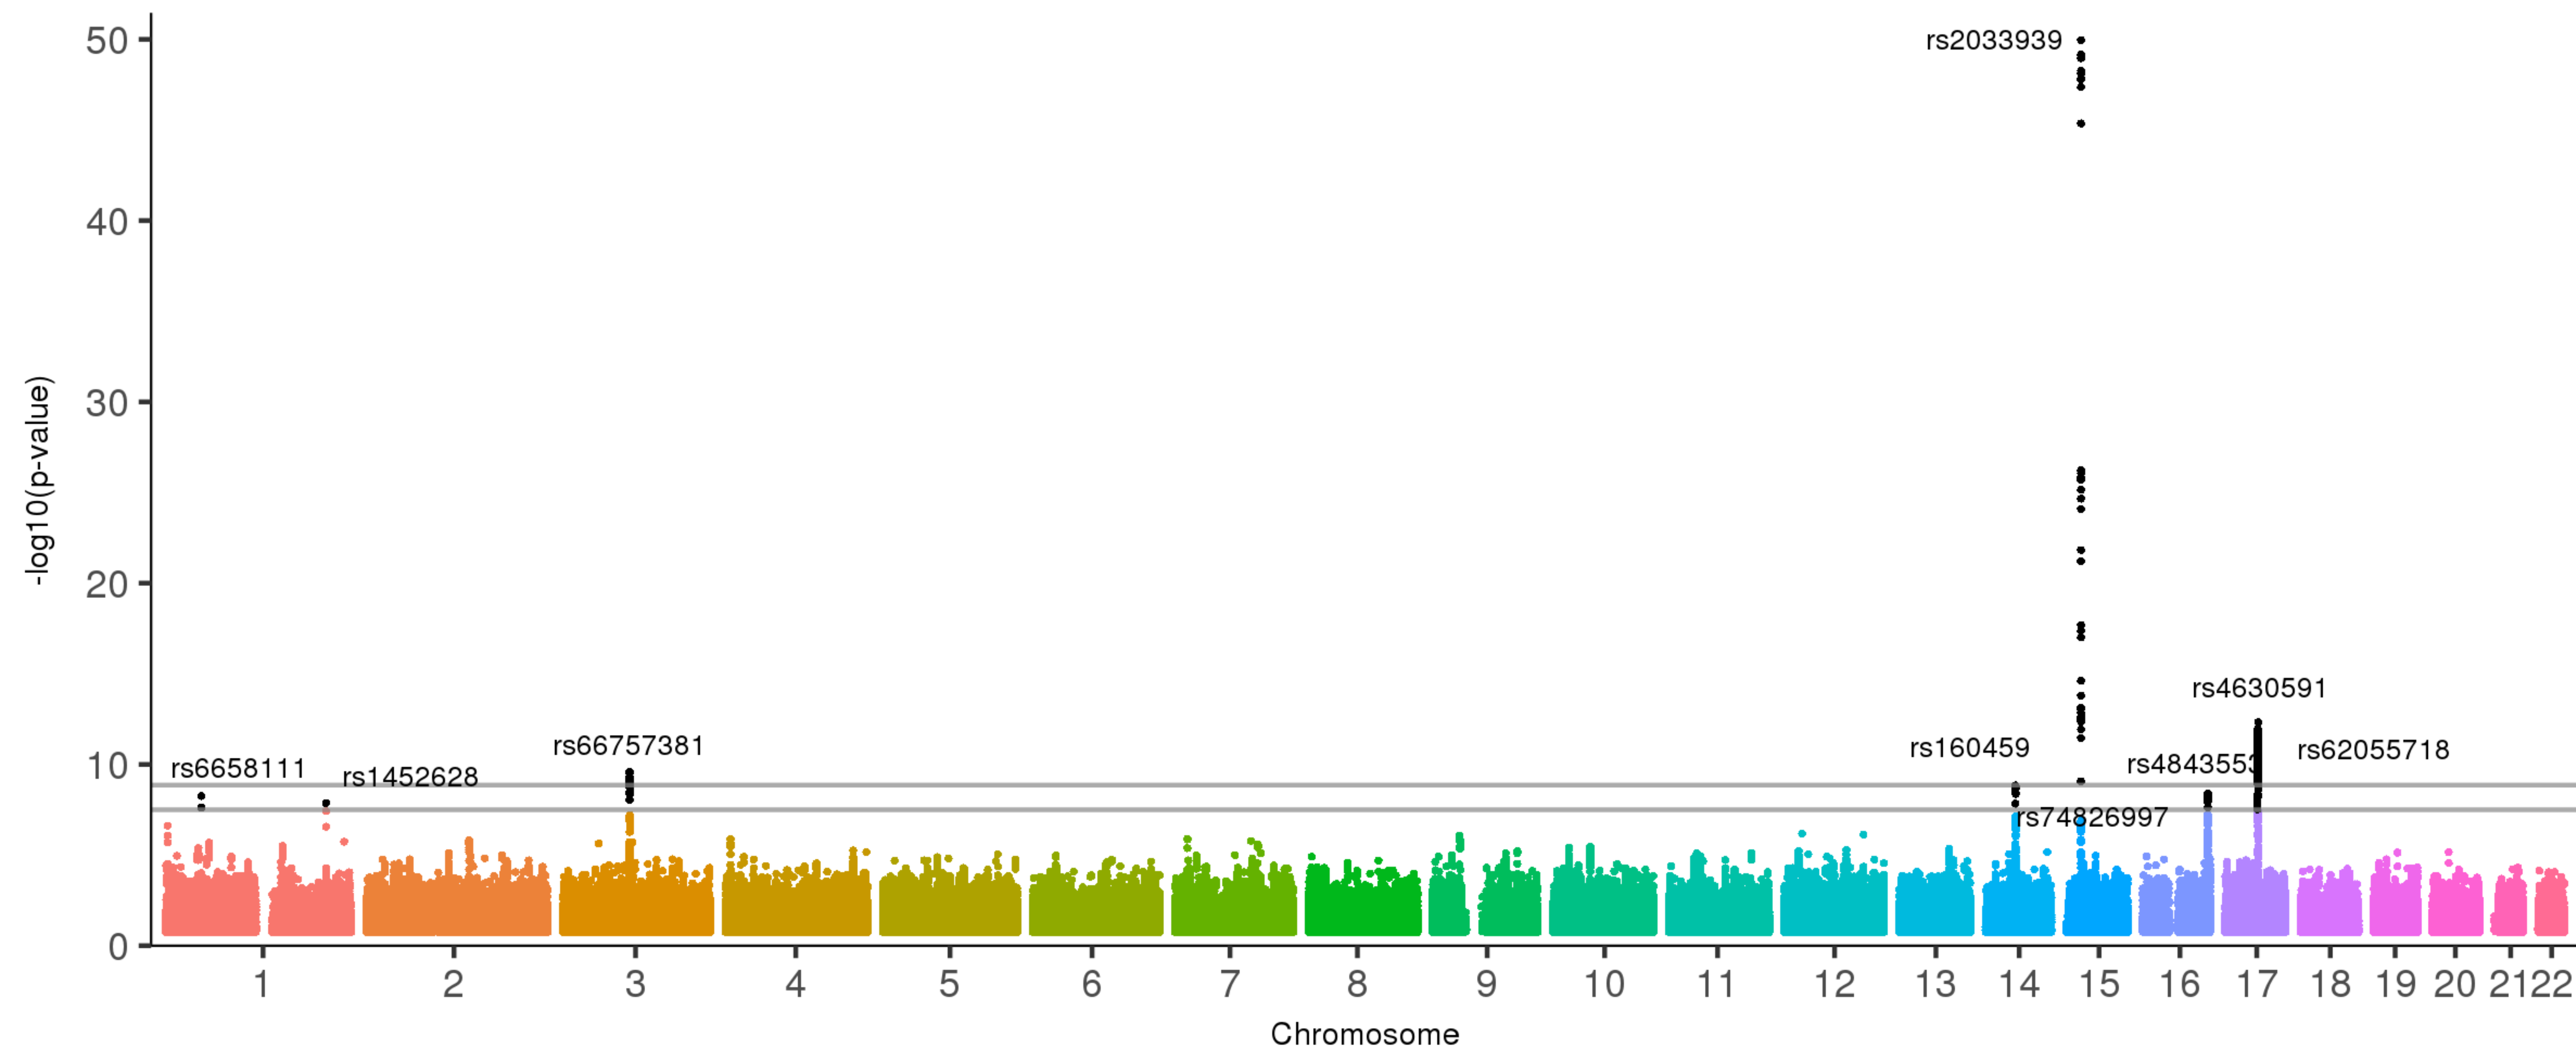

Freesurfer thickness

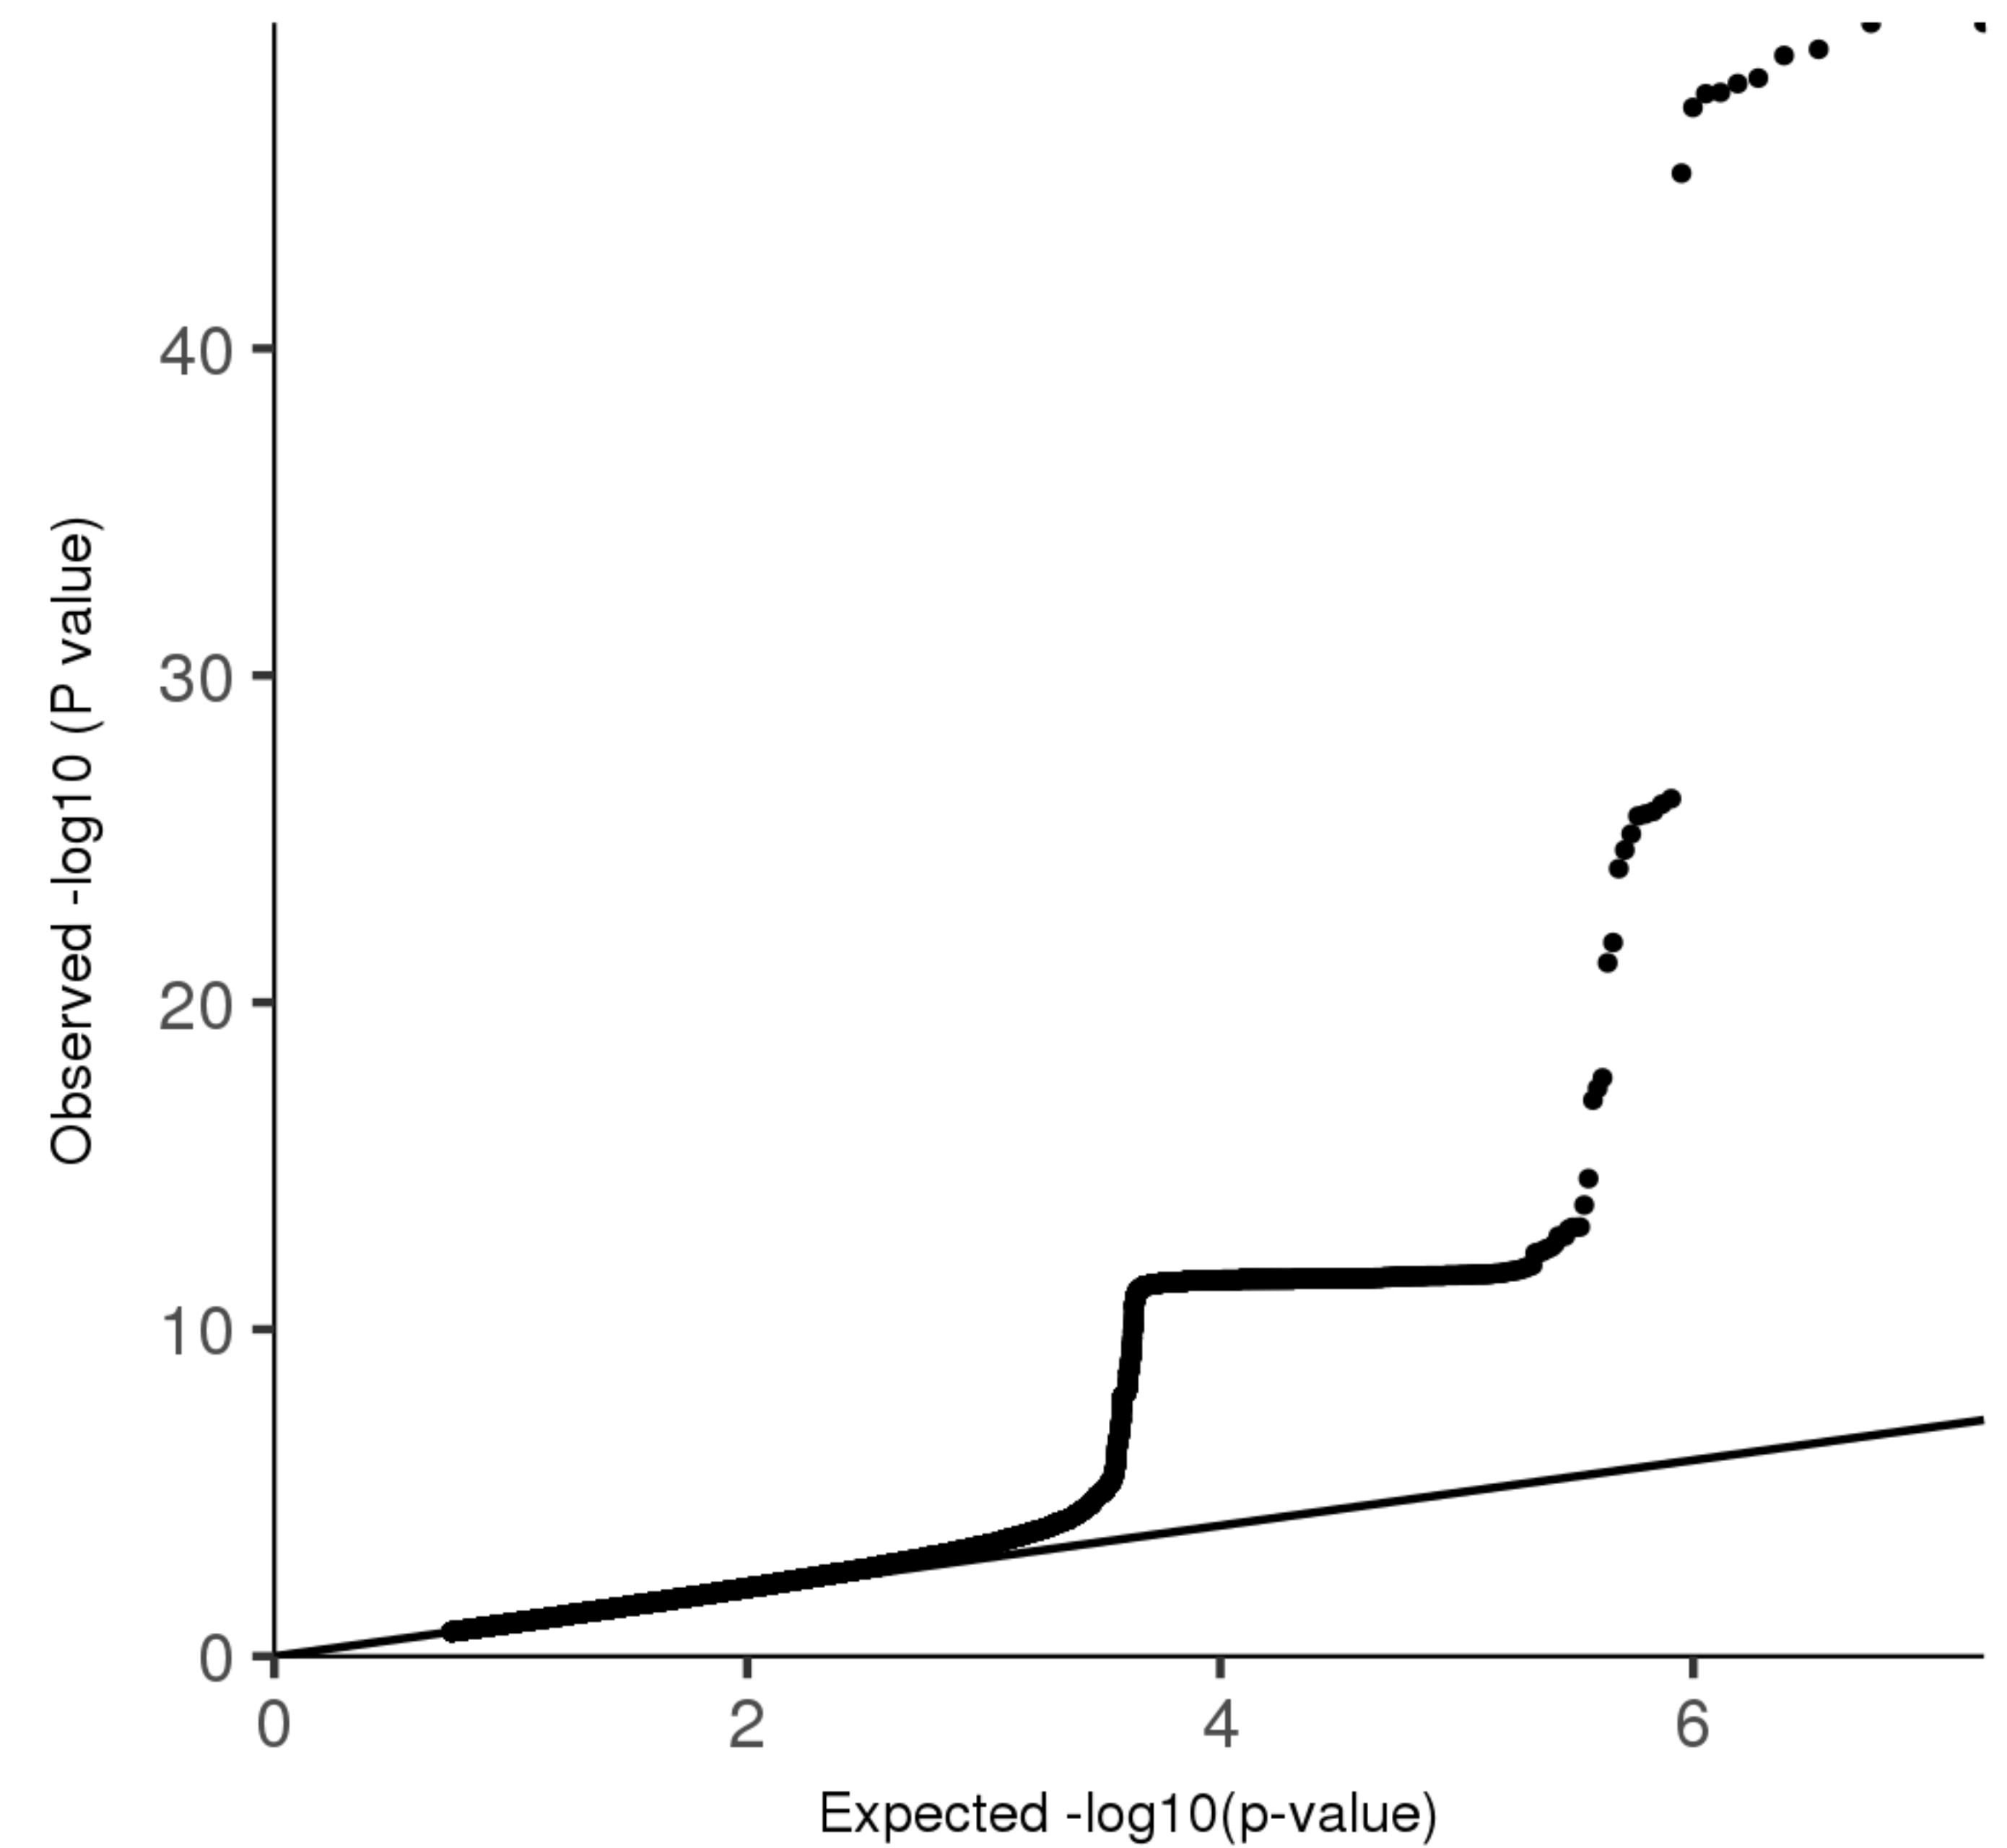

Supplement: Supplementary file [file 178806-12.pdf]
